# Supplementary material
Source: Royal Society of Chemistry journal article supplement (doi:10.1039/d6cc00441e)
Supplement: d6cc00441e1.pdf [file d6cc00441e1.pdf]

Supplemental material for:

## Total Synthesis of (+)-Xiamycin G *via* Acetanilide Assisted Two-Fold Csp<sup>2</sup>-H Functionalization

Rhituparna Nandi,<sup>a§</sup> Souvik Biswas,<sup>b§</sup> Sreyashi Sadhukhan,<sup>b</sup> Apurba Das,<sup>b</sup> and Alakesh Bisai<sup>\*a,b</sup>

<sup>a</sup>Department of Chemistry, Indian Institute of Science Education and Research Bhopal, Bhopal Bypass Road, Bhopal, MP - 462 066, India.

<sup>b</sup>Department of Chemical Sciences, Indian Institute of Science Education and Research Kolkata, Mohanpur, Nadia, WB - 741 246, India.

*e*-Mail: [alakesh@iiserkol.ac.in](mailto:alakesh@iiserkol.ac.in); [alakeshb@gmail.com](mailto:alakeshb@gmail.com)

### Table of Contents

|                                                                                    |         |
|------------------------------------------------------------------------------------|---------|
| Materials and Methods                                                              | S2      |
| Synthesis of compound <b>13</b>                                                    | S3-S4   |
| Dealkylative <i>ipso</i> -Nitration of (+)- <b>13</b>                              | S4-S5   |
| Synthesis of (+)- <b>11</b> and (+)- <b>14</b>                                     | S5-S7   |
| First generation approach following directed double Csp <sup>2</sup> -H activation | S8-S9   |
| Aniline directed <i>o</i> -hydroxylation (+)- <b>15</b>                            | S9-S10  |
| Synthesis of (+)- <b>10</b>                                                        | S10-S11 |
| Chemoselective methylation of (+)- <b>10</b>                                       | S12-S14 |
| Synthesis of (+)- <b>21</b> and (+)- <b>22</b>                                     | S14-S16 |
| Buchwald's oxidative C-N bond formation                                            | S17-S18 |
| Syntheses of (+)- <b>22a-c</b> , and (+)- <b>23a-f</b>                             | S19-S31 |
| Synthesis of (+)- <b>27</b> and (+)- <b>28</b>                                     | S32-S34 |
| Total Synthesis of xiamycin G [(+)- <b>1b</b> ]                                    | S34-S37 |
| References                                                                         | S37     |
| Spectral Traces                                                                    | S38-S83 |
| X-Ray Crystallographic data of (+)- <b>12</b>                                      | S84     |
| X-Ray Crystallographic data of (+)- <b>15</b>                                      | S85     |

## Materials and Methods

Unless otherwise stated, reactions were carried out using oven dried glass ware with Teflon coated magnetic stirring bars were used to stir the reactions. The Syringe was used to transfer the solvents and liquid reagents. Tetrahydrofuran (THF) Diethyl ether (Et<sub>2</sub>O) were distilled over sodium/benzophenone ketyl. Dichloromethane (CH<sub>2</sub>Cl<sub>2</sub>) was distilled over calcium hydride. All other solvents like MeOH, EtOAc, DMF, Dichloroethane (DCE) and reagents were used as received. Reaction temperatures above 25 °C were maintained by using oil bath on a magnetic stirrer. Thin layer chromatography (TLC) analysis was performed by using silica gel precoated plates (0.25 mm) 60 (F-254), Visualized by UV irradiation, yellow dip stain and other stains. Silica gel of particle size 230-400 and 100-200 mesh were used to perform flash chromatography. Digital melting point apparatus is used to record the melting points. <sup>1</sup>H-NMR spectra was recorded by using 400, 500 MHz spectrometers, <sup>13</sup>C-NMR operating frequencies are 100, 125 MHz respectively. Chemical shifts (δ) are reported in ppm relative to the residual solvents (CDCl<sub>3</sub>) signal (δ = 7.29 for <sup>1</sup>H NMR and δ = 77.0 for <sup>13</sup>C NMR) and (CD<sub>3</sub>OD) signal (δ = 3.33 for <sup>1</sup>H NMR and δ = 49.0 for <sup>13</sup>C NMR). Data for <sup>1</sup>H NMR spectra are reported as follows: chemical shift (multiplicity, coupling constants, and number of hydrogen). Abbreviations are as follows: s (singlet), d (doublet), t (triplet), q (quartet), m (multiplet), br (broad). IR spectra were recorded on a FT-IR system (Spectrum BX) and are reported in frequency of absorption (cm<sup>-1</sup>). Only selected IR absorbencies are reported. High Resolution Mass Spectrometry (HRMS) data was recorded on MicrOTOF-Q-II mass spectrometer using methanol as solvent. Optical rotations were measured on an automatic polarimeter.

## Acetylation of (+)-5:

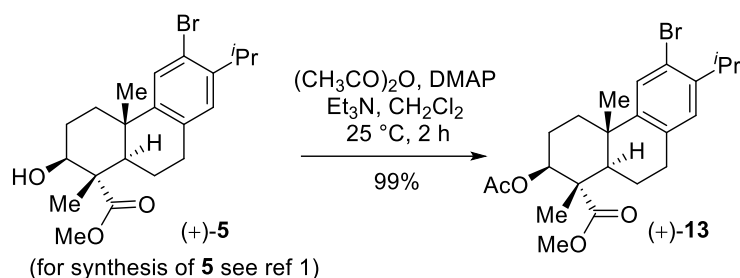

Carbotricyclic compound (+)-**5** (5 g, 12.2 mmol, 1.0 equiv.) was taken in CH<sub>2</sub>Cl<sub>2</sub> (30 mL) under an inert atmosphere. To this solution was added Et<sub>3</sub>N (2.61 mL, 18.3 mmol., 1.5 equiv.) followed by the addition of catalytic amount of DMAP (149 mg, 1.22 mmol, 0.1 equiv.) at room temperature. After 5 minutes of stirring, acetic anhydride (Ac<sub>2</sub>O, 1.4 mL, 14.64 mmol, 1.2 equiv.) was added to the reaction mixture dropwise at 25 °C and the stirring was continued till the consumption of starting material (2 h). Upon completion of the reaction (TLC analysis), water (10 mL) was added and the reaction mixture was extracted CH<sub>2</sub>Cl<sub>2</sub> (30 mL X 2). The organic layers were dried over Na<sub>2</sub>SO<sub>4</sub> and concentrated on a rotary evaporator under reduced pressure. The crude product was purified by flash column chromatography with 10% EtOAc in *n*-hexane to furnish acetate (+)-**13** as yellow foam (5.45 g, 99% yield).

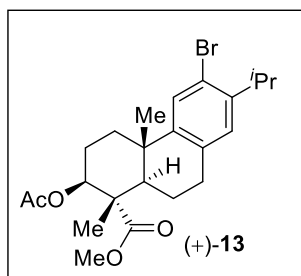

**Methyl** (1*S*,2*S*,4*aS*,10*aR*)-2-acetoxy-6-bromo-7-isopropyl-1,4*a*-dimethyl-1,2,3,4,4*a*,9,10,10*a*-octahydrophenanthrene-1-carboxylate [(+)-**13**]: (+)-**13** was obtained as yellow foam (12.2 mmol scale, 5.45 g, 99% yield). *R<sub>f</sub>* = 0.3 (10% EtOAc in *n*-hexane).

<sup>1</sup>H NMR (500 MHz, CDCl<sub>3</sub>) δ 7.36 (s, 1H), 6.93 (s, 1H), 5.22 (dd, *J* = 11.9, 4.6 Hz, 1H), 3.68 (s, 3H), 3.28 (p, *J* = 6.8 Hz, 1H), 2.94 – 2.75 (m, 2H), 2.31 (dt, *J* = 13.2, 3.5 Hz, 1H), 2.20 (dd, *J* = 12.5, 2.2 Hz, 1H), 2.02 (s, 3H), 2.02 – 1.95 (m, 1H), 1.90 (ddd, *J* = 12.9, 6.6, 4.7 Hz, 1H), 1.86 – 1.80 (m, 1H), 1.72 (ddd, *J* = 13.8, 10.1, 3.5 Hz, 1H), 1.39 (ddt, *J* = 13.7, 7.5, 2.3 Hz, 1H), 1.31 (s, 3H), 1.23 (s, 3H), 1.21 (d, *J* = 7.3 Hz, 6H).

$^{13}\text{C}$  NMR (125 MHz,  $\text{CDCl}_3$ )  $\delta$  176.3, 170.0, 147.8, 144.4, 134.1, 128.7, 127.1, 121.7, 76.7, 52.4, 52.0, 45.3, 36.7, 36.2, 32.3, 29.5, 25.0, 23.9, 23.0, 22.8, 21.1, 21.0, 11.7.

IR (neat)  $\nu_{\text{max}}$  3307, 2887, 2792, 1702, 1687, 1531, 1414, 1208, 1051, 946, 787  $\text{cm}^{-1}$ .

HRMS (ESI)  $m/z$ :  $[\text{M} + \text{Na}]^+$  calcd. for  $[\text{C}_{23}\text{H}_{31}\text{O}_4\text{Br} + \text{Na}]^+$  473.1298, found 473.1288.

$[\alpha]_{589}^{25} = +66.42$  ( $c = 0.85$ ,  $\text{CHCl}_3$ ).

### *ipso*-Nitration of (+)-13:

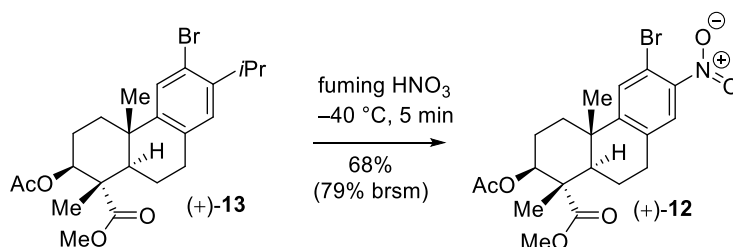

An oven-dried round-bottom flask was charged with 2 mL of fuming nitric acid and it was cooled to  $-40^\circ\text{C}$ . Then compound (+)-13 (800 mg, 1.8 mmol, 1.0 equiv.) was directly charged into the reaction vessel and scratched well with a spatula (5 minutes) maintaining the  $-40^\circ\text{C}$  temperature. After 5 minutes (TLC analysis showed product formation), the reaction mixture was quenched with water (5 mL) and saturated  $\text{NaHCO}_3$  (15 mL) and extracted with  $\text{CH}_2\text{Cl}_2$  (20 mL X 2). The organic layers were dried over  $\text{Na}_2\text{SO}_4$  and concentrated in a rotary evaporator under reduced pressure and purified by column chromatography 10% EtOAc in *n*-hexane to afford compound (+)-12 as white foam [547 mg, 68% yield (79% BRSM)]. Compound (+)-12 was prepared in 2.1 g following several batches.

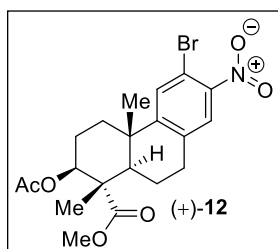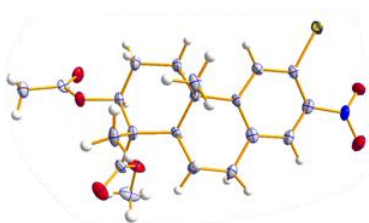

XRD data of (+)-12  
CCDC: 2496283

**Methyl (1*S*,2*S*,4*aS*,10*aR*)-2-acetoxy-6-bromo-1,4*a*-dimethyl-7-nitro-1,2,3,4,4*a*,9,10,10*a*-octahydrophenanthrene-1-carboxylate [(+)-12]:** (+)-12 was obtained as a white foam. (1.8 mmol scale, 547 mg, 68% yield);  $R_f = 0.27$  (20% EtOAc in *n*-hexane).

**<sup>1</sup>H NMR** (500 MHz, CDCl<sub>3</sub>) δ 7.60 (s, 1H), 7.57 (s, 1H), 5.21 (dd, *J* = 11.9, 4.5 Hz, 1H), 3.70 (d, *J* = 1.5 Hz, 3H), 2.97 (dd, *J* = 17.8, 7.0 Hz, 1H), 2.92 – 2.83 (m, 1H), 2.35 (dt, *J* = 13.2, 3.2 Hz, 1H), 2.25 – 2.17 (m, 1H), 2.04 (s, 3H), 2.03 (s, 1H), 1.97 – 1.81 (m, 2H), 1.75 (td, *J* = 13.4, 3.5 Hz, 1H), 1.46 (dd, *J* = 13.8, 7.5 Hz, 1H), 1.33 (s, 3H), 1.26 (s, 3H).

**<sup>13</sup>C NMR** (125 MHz, CDCl<sub>3</sub>) δ 175.7, 169.8, 154.5, 147.5, 135.7, 131.3, 126.2, 111.4, 76.0, 53.0, 51.7, 44.6, 37.3, 35.8, 29.1, 24.7, 23.6, 20.9, 20.3, 11.6.

**IR** (neat)  $\nu_{\max}$  1857, 1705, 1690, 1621, 1363, 1301, 1203, 891, 741 cm<sup>-1</sup>.

**HRMS** (ESI) *m/z*: [M + Na]<sup>+</sup> calcd. for [C<sub>20</sub>H<sub>24</sub>O<sub>6</sub>NBr + Na]<sup>+</sup> 476.0679, found 476.0667.

[ $\alpha$ ]<sub>D</sub><sup>25</sup><sub>589</sub> = +37.5 (*c* = 0.69, CHCl<sub>3</sub>).

### Synthesis of (+)-11:

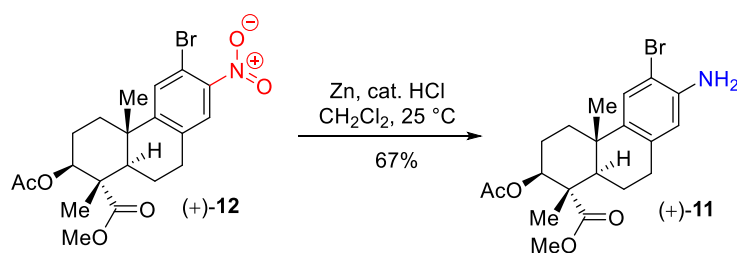

In a round-bottom flask *o*-bromo nitroarene (+)-12 (945 mg, 2.08 mmol, 1 equiv.) was taken in 15 mL CH<sub>2</sub>Cl<sub>2</sub>. Next, Zn dust (1.36 g, 20.80 mmol, 10 equiv.) was added to the reaction solution followed by addition of catalytic amount of Conc. HCl was added to the reaction mixture at 0 °C in dropwise manner. Upon completion of the reaction (3 h), as monitored by TLC analysis, it was extracted with CH<sub>2</sub>Cl<sub>2</sub> (25 mL X 3). The combined organic layers were washed with sodium bicarbonate (15 mL X 1) and dried over Na<sub>2</sub>SO<sub>4</sub> and concentrated in a rotary evaporator under reduced pressure. The crude product was purified by flash chromatography with 25- 35% EtOAc in *n*-hexane to furnish (+)-11 as a colourless liquid (591 mg, 67% yield).

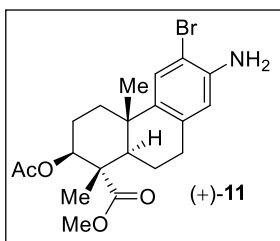

**Methyl (1*S*,2*S*,4*aS*,10*aR*)-2-acetoxy-7-amino-6-bromo-1,4*a*-dimethyl-1,2,3,4,4*a*,9,10,10*a*-octahydrophenanthrene-1-carboxylate [(+)-11]:** (+)-11 was obtained as colorless liquid; (2.08 mmol scale, 591 mg, 67% yield);  $R_f = 0.3$  (20% EtOAc in *n*-hexane).

**<sup>1</sup>H NMR** (500 MHz, CDCl<sub>3</sub>)  $\delta$  7.24 (s, 1H), 6.47 (s, 1H), 5.22 (dd,  $J = 11.9, 4.6$  Hz, 1H), 3.93 (s, 2H), 3.68 (s, 3H), 2.80 – 2.72 (m, 2H), 2.26 (dt,  $J = 13.3, 3.5$  Hz, 1H), 2.17 (dd,  $J = 12.5, 2.3$  Hz, 1H), 2.02 (s, 3H), 2.00 – 1.94 (m, 1H), 1.91 – 1.83 (m, 1H), 1.83 – 1.76 (m, 1H), 1.68 (td,  $J = 13.3, 3.5$  Hz, 1H), 1.34 (ddt,  $J = 13.2, 6.7, 2.2$  Hz, 1H), 1.30 (s, 3H), 1.22 – 1.19 (m, 3H).

**<sup>13</sup>C NMR** (125 MHz, CDCl<sub>3</sub>)  $\delta$  176.4, 170.1, 141.7, 140.6, 135.1, 128.5, 115.5, 107.5, 77.2, 52.4, 52.0, 45.6, 36.4, 36.3, 29.5, 25.2, 24.0, 21.1, 21.0, 11.6.

**IR** (neat)  $\nu_{\max}$  3441, 3357, 1843, 1703, 1687, 1609, 1473, 1278, 883 cm<sup>-1</sup>.

**HRMS** (ESI)  $m/z$ :  $[M + H]^+$  calcd. for  $[C_{20}H_{26}BrO_4N + H]^+$  424.1123, found 424.1132.

$[\alpha]_{589}^{25} = +41.32$  ( $c = 0.78$ , CHCl<sub>3</sub>).

#### Synthesis of (+)-14:

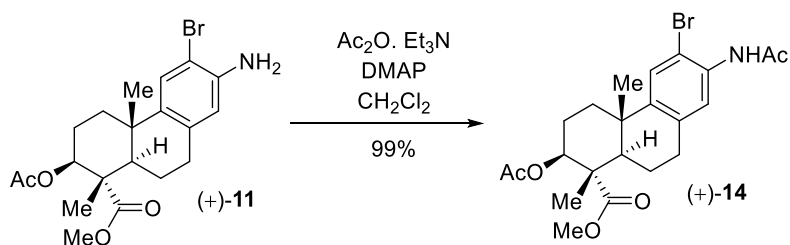

In an oven dried round-bottom flask, (+)-11 (42 mg, 0.098 mmol, 1.0 equiv.) was taken in dry CH<sub>2</sub>Cl<sub>2</sub> (6 mL). To the solution was added Et<sub>3</sub>N (21  $\mu$ L, 0.147 mmol., 1.5 equiv.) and catalytic amount of DMAP (1.1 mg, 0.009 mmol., 0.1 equiv.) at 25 °C. Acetic anhydride (13  $\mu$ L, 0.127 mmol., 1.3 equiv.) was added at 25 °C and it was allowed to stir until the full consumption of

starting material (3 h). Upon completion of the reaction (as monitored by TLC analysis), water (4 mL) was added and then extracted with CH<sub>2</sub>Cl<sub>2</sub> (6 mL X 2). The organic layers were separated and dried over Na<sub>2</sub>SO<sub>4</sub> and concentrated on a rotary evaporator under the reduced pressure. The crude bis-acetate was purified by flash column chromatography with 40% EtOAc in *n*-hexane to afford (+)-**14** as yellow liquid (45 mg, 99% yield).

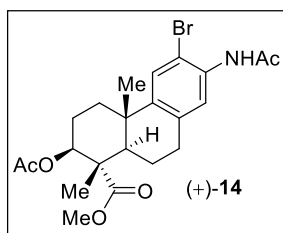

**Methyl** (1*S*,2*S*,4*aS*,10*aR*)-7-acetamido-2-acetoxy-6-bromo-1,4*a*-dimethyl-1,2,3,4,4*a*,9,10,10*a*-octahydrophenanthrene-1-carboxylate [(+)-**14**]: (+)-**14** was obtained as colorless liquid; (0.098mmol scale, 45 mg, 99% yield);  $R_f = 0.2$  (30% EtOAc in *n*-hexane).

<sup>1</sup>H NMR (500 MHz, CDCl<sub>3</sub>):  $\delta$  7.97 (s, 1H), 7.49 (s, 1H), 7.36 (s, 1H), 5.21 (dd,  $J = 11.9, 4.5$  Hz, 1H), 3.68 (s, 3H), 2.95 – 2.78 (m, 2H), 2.31 – 2.24 (m, 1H), 2.22 (s, 3H), 2.19 – 2.15 (m, 1H), 2.02 (s, 3H), 1.84 (dtd,  $J = 37.3, 12.5, 4.0$  Hz, 2H), 1.70 (ddd,  $J = 17.1, 10.6, 3.9$  Hz, 2H), 1.39 (dt,  $J = 13.3, 6.8$  Hz, 1H), 1.30 (s, 3H), 1.21 (s, 3H).

<sup>13</sup>C NMR (125 MHz, CDCl<sub>3</sub>):  $\delta$  176.3, 170.1, 168.3, 146.2, 135.5, 133.3, 128.2, 124.2, 122.4, 76.7, 52.5, 52.1, 45.4, 36.9, 36.4, 29.8, 25.1, 24.9, 24.0, 21.2, 21.0, 11.8.

IR (neat)  $\nu_{\max}$  3387, 3271, 3093, 2804, 1709, 1687, 1564, 1267, 762, 655 cm<sup>-1</sup>.

$[\alpha]_{589}^{25} = +41.62$  ( $c = 0.28$ , CHCl<sub>3</sub>).

**Our first-generation approach towards xiamycin G (1b):**

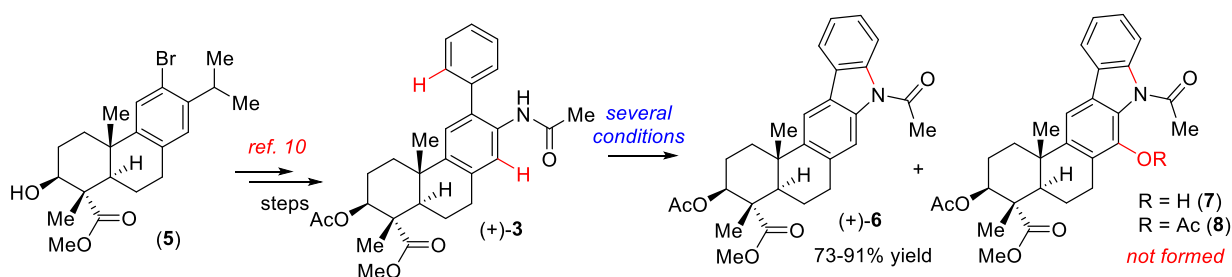

**Table 1:** Optimization Table for directed double Csp<sup>2</sup>-H activation

| Entry | Reagent                                                                                             | Solvent                                                          | Temp.  | Time | Result             |
|-------|-----------------------------------------------------------------------------------------------------|------------------------------------------------------------------|--------|------|--------------------|
| 1     | Pd(OAc) <sub>2</sub> , PhI(OAc) <sub>2</sub> , O <sub>2</sub>                                       | AcOH: Ac <sub>2</sub> O (3:1)                                    | 100 °C | 9 h  | 13% of <b>6</b>    |
| 2     | Pd(OAc) <sub>2</sub> , K <sub>2</sub> S <sub>2</sub> O <sub>8</sub>                                 | TFA: TFAA (9:1)                                                  | 100 °C | 8 h  | 86% of <b>6</b>    |
| 3     | BBr <sub>3</sub> then NaBO <sub>3</sub> ·4H <sub>2</sub> O                                          | CH <sub>2</sub> Cl <sub>2</sub> then THF: H <sub>2</sub> O (1:1) | 25 °C  | 3 h  | Multitude of spots |
| 4     | Pd(OAc) <sub>2</sub> , K <sub>2</sub> S <sub>2</sub> O <sub>8</sub>                                 | DCE: AcOH (2:1)                                                  | 80 °C  | 12 h | 89% of <b>6</b>    |
| 5     | Pd(OAc) <sub>2</sub> , TBHP in decane                                                               | Toluene                                                          | 100 °C | 10 h | 73% of <b>6</b>    |
| 6     | Pd(OAc) <sub>2</sub> , TFA, TBHP in H <sub>2</sub> O                                                | -                                                                | 25 °C  | 24 h | Multitude of spots |
| 7     | AgOTf, PIFA                                                                                         | DCE                                                              | 25 °C  | 1 h  | 91% of <b>6</b>    |
| 8     | [Ru( <i>p</i> -cymene)Cl <sub>2</sub> ] <sub>2</sub> , K <sub>2</sub> S <sub>2</sub> O <sub>8</sub> | TFA: TFAA (9:1)                                                  | 80 °C  | 8 h  | Multitude of spots |

<sup>a</sup>all reactions were done using 0.1 mmol of 2-phenyl acetanilide **3** and yields are reported after column purification.

**Table 2:** Optimization for aniline/ acetanilide directed *o*-hydroxylation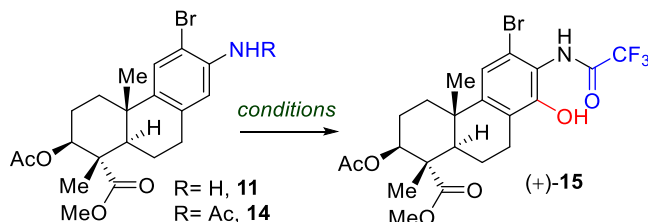

| Entry | Substrate | Reagent                                                                                             | Solvent            | Temp.  | Time | Result           |
|-------|-----------|-----------------------------------------------------------------------------------------------------|--------------------|--------|------|------------------|
| 1     | <b>14</b> | [Ru( <i>p</i> -cymene)Cl <sub>2</sub> ] <sub>2</sub> , K <sub>2</sub> S <sub>2</sub> O <sub>8</sub> | TFA: TFAA (3:1)    | 80 °C  | 12 h | 83% of <b>15</b> |
| 2     | <b>11</b> | Oxone, TFA                                                                                          | CH <sub>3</sub> CN | 80 °C  | 10 h | 21% of <b>15</b> |
| 3     | <b>11</b> | Oxone, TFA                                                                                          | DMSO               | 120 °C | 10 h | 29% of <b>15</b> |
| 4     | <b>11</b> | Oxone, TFA                                                                                          | 1,4-dioxane        | 90 °C  | 6 h  | 94% of <b>15</b> |
| 5     | <b>11</b> | K <sub>2</sub> S <sub>2</sub> O <sub>8</sub> , TFA                                                  | 1,4-dioxane        | 90 °C  | 6 h  | 33% of <b>15</b> |
| 6     | <b>11</b> | TBHP, TFA                                                                                           | 1,4-dioxane        | 90 °C  | 17 h | NR               |
| 7     | <b>11</b> | Oxone, AcOH                                                                                         | 1,4-dioxane        | 90 °C  | 6 h  | decomposition    |

|   |           |                                     |             |       |     |                  |
|---|-----------|-------------------------------------|-------------|-------|-----|------------------|
| 8 | <b>11</b> | H <sub>2</sub> O <sub>2</sub> , TFA | 1,4-dioxane | 90 °C | 6 h | 19% of <b>15</b> |
|---|-----------|-------------------------------------|-------------|-------|-----|------------------|

<sup>a</sup>all reactions were done using 0.1 mmol of substrate and yields are reported after column purification. <sup>b</sup>starting materials were recovered in 15-37% yield.

### Aniline directed *o*-hydroxylation (+)-**15**:

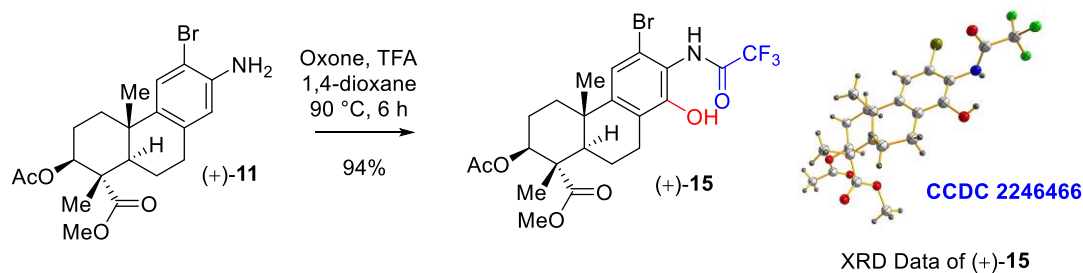

In an oven dried sealed tube oxone (302 mg, 0.981 mmol, 1.2 equiv.) was taken in 1,4-dioxane (4 mL) under argon atmosphere and TFA (158 mL, 2.045 mmol, 2.5 equiv.) was added to it and stirred the reaction mixture for another 10 min. After that 2-bromo aniline derivative (+)-**11** (347 mg, 0.818 mmol, 1.0 equiv.) dissolved in 1,4-dioxane (3 mL) was added to the mixture dropwise manner. The reaction mixture was sonicated and degassed and refilled with N<sub>2</sub> from the double manifold (this sequence was carried out 3 times). The sealed tube was set into a pre-heated oil bath at 90 °C and stirred for 6 h (complete consumption of starting materials). After cooling it to room temperature, the reaction mixture was diluted with water (4 mL) and extracted with EtOAc (6 mL X 3). The combined organic layers were washed with aqueous saturated Na<sub>2</sub>S<sub>2</sub>O<sub>3</sub> solution (3 mL) and dried over anhydrous Na<sub>2</sub>SO<sub>4</sub>, and concentrated in a rotary evaporator under reduced pressure. The residue was purified by silica gel column chromatography with 23% EtOAc in *n*-hexane to afford to provide (+)-**15** as yellow foam (412 mg, 94% yield).

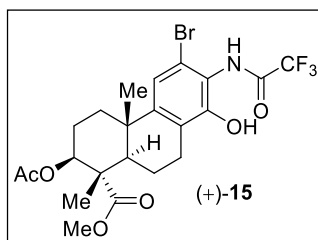

**Methyl** (1*S*,2*S*,4*aS*,10*aR*)-2-acetoxy-6-bromo-8-hydroxy-1,4*a*-dimethyl-7-(2,2,2-trifluoroacetamido)-1,2,3,4,4*a*,9,10,10*a*-octahydrophenanthrene-1-carboxylate [(+)-**15**]: (+)-**15** was obtained as a yellow foam (0.818 mmol scale, 412 mg, 94% yield); *R*<sub>f</sub> = 0.2 (20% EtOAc in *n*-hexane).

**<sup>1</sup>H NMR** (500 MHz, CDCl<sub>3</sub>): 8.41 (s, 1H), 7.57 (s, 1H), 7.13 (s, 1H), 5.22 (dd, *J* = 11.9, 4.5 Hz, 1H), 3.70 (s, 3H), 2.94 (ddd, *J* = 18.5, 6.9, 1.3 Hz, 1H), 2.66 (ddd, *J* = 19.0, 11.4, 8.1 Hz, 1H), 2.28 (dt, *J* = 13.1, 3.5 Hz, 1H), 2.17 (dd, *J* = 12.7, 2.2 Hz, 1H), 2.03 (s, 3H), 2.02 – 1.98 (m, 1H), 1.91 – 1.79 (m, 2H), 1.70 (td, *J* = 13.4, 3.6 Hz, 1H), 1.49 – 1.43 (m, 1H), 1.31 (s, 3H), 1.24 (s, 3H).

**<sup>13</sup>C NMR** (125 MHz, CDCl<sub>3</sub>): δ 176.1, 170.1, 157.0 – 155.6 (m), 150.9, 148.3, 127.0, 120.9, 118.4, 116.8, 114.4, 76.5, 52.5, 51.9, 44.9, 37.0, 36.2, 24.8, 24.5, 23.8, 21.1, 20.2, 11.7.

**<sup>19</sup>F NMR** (470 MHz, CDCl<sub>3</sub>) δ -74.54.

**IR** (neat)  $\nu_{\max}$  3293, 2805, 1821, 1701, 1697, 1645, 1357, 1178, 965, cm<sup>-1</sup>.

**HRMS** (ESI) *m/z*: [M+ Na]<sup>+</sup> calcd. for [C<sub>22</sub>H<sub>25</sub>BrF<sub>3</sub>O<sub>6</sub>N + Na]<sup>+</sup> 558.0710, found 558.0727.

[ $\alpha$ ]<sub>D</sub><sup>25</sup> = +28.0 (*c* = 0.89, CH<sub>3</sub>OH).

### Synthesis of (+)-10:

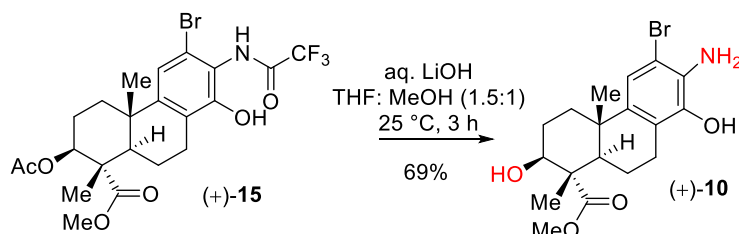

Trifluoroacetamido derivative (+)-15 (390 mg, 0.727 mmol, 1.0 equiv.) was dissolved in THF: MeOH (1.5:1) (6 mL) and 2 M solution of aq. LiOH solution (727  $\mu$ L, 1.45 mmol, 2 equiv.) was added to it at room temperature and stirred the reaction mixture for another 3 h at the same temperature. Upon completion of the reaction, as monitored by TLC analysis, THF: MeOH solvent mixture was evaporated and it was extracted with CH<sub>2</sub>Cl<sub>2</sub> (6 mL X 3). The combined organic layers were dried over Na<sub>2</sub>SO<sub>4</sub> and concentrated in a rotary evaporator under reduced pressure. The crude product was purified by flash chromatography with 25- 50- 60% EtOAc in *n*-hexane to furnish (+)-10 as a colourless liquid (199 mg, 69% yield).

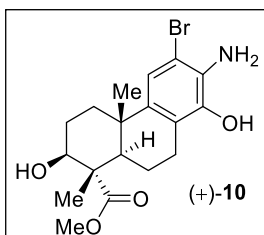

**Methyl** (1*S*,2*S*,4*aS*,10*aR*)-7-amino-6-bromo-2,8-dihydroxy-1,4*a*-dimethyl-1,2,3,4,4*a*,9,10,10*a*-octahydrophenanthrene-1-carboxylate [(+)-10]: (+)-10 was obtained as a red oil (0.727 mmol scale, 199 mg, 69% yield);  $R_f = 0.25$  (50% EtOAc in *n*-hexane).

$^1\text{H NMR}$  (400 MHz,  $\text{CDCl}_3$ ):  $\delta$  6.98 (s, 1H), 4.02 (dd,  $J = 11.6, 4.6$  Hz, 1H), 3.76 (s, 3H), 2.80 – 2.70 (m, 1H), 2.58 (dt,  $J = 17.4, 9.0$  Hz, 1H), 2.26 (d,  $J = 13.0$  Hz, 1H), 2.07 (s, 1H), 1.91 (s, 1H), 1.88 (d,  $J = 3.9$  Hz, 1H), 1.79 (d,  $J = 11.8$  Hz, 1H), 1.62 (d,  $J = 12.3$  Hz, 1H), 1.58 – 1.50 (m, 1H), 1.26 (s, 3H), 1.21 (s, 3H).

$^{13}\text{C NMR}$  (101 MHz,  $\text{CDCl}_3$ ):  $\delta$  177.7, 142.7, 142.2, 125.0, 120.3, 119.9, 109.9, 75.1, 53.6, 52.3, 45.1, 36.8, 36.6, 27.2, 25.3, 24.0, 20.5, 10.6.

**IR** (neat)  $\nu_{\text{max}}$  3498, 3437, 3387, 1809, 1699, 1653, 1598, 1481, 1262, 798  $\text{cm}^{-1}$ .

**HRMS** (ESI)  $m/z$ :  $[\text{M} + \text{H}]^+$  calcd. for  $[\text{C}_{18}\text{H}_{24}\text{BrO}_4\text{N} + \text{H}]^+$  398.0967, found 398.0966.

$[\alpha]_{589}^{25} = +88.0$  ( $c = 0.67$ ,  $\text{CHCl}_3$ ).

### Chemoselective methylation of (+)-10:

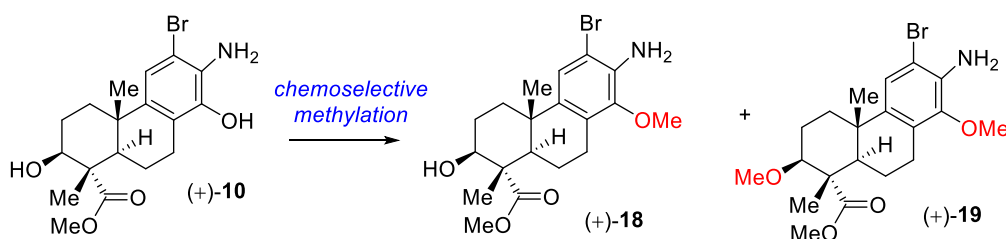

**Table 3:** Optimization table

| Entry | Methylating Reagent      | Base                    | Solvent                  | Temp. | Time  | Yield                                 |
|-------|--------------------------|-------------------------|--------------------------|-------|-------|---------------------------------------|
| 1     | $\text{Me}_2\text{SO}_4$ | $\text{K}_2\text{CO}_3$ | Acetone                  | 55 °C | 5 h   | 28% of <b>18</b> + multitude of spots |
| 2     | $\text{Me}_2\text{SO}_4$ | $\text{K}_2\text{CO}_3$ | Acetone                  | 55 °C | 1.5 h | 17% of <b>18</b> + other spots        |
| 3     | MeI                      | $\text{Et}_3\text{N}$   | $\text{CH}_2\text{Cl}_2$ | 25 °C | 4 h   | Multitude of spots                    |
| 4     | MeI                      | NaH                     | DMF                      | 25 °C | 2 h   | 15% ( <b>18</b> ) + 31% ( <b>19</b> ) |

|   |     |                    |             |       |        |                                       |
|---|-----|--------------------|-------------|-------|--------|---------------------------------------|
| 5 | MeI | NaH                | DMF         | 0 °C  | 20 min | 71% of <b>18</b>                      |
| 6 | MeI | NaH                | DMF         | 0 °C  | 45 min | 32% ( <b>18</b> )+ 27% ( <b>19</b> )  |
| 7 | MeI | KO <sup>t</sup> Bu | THF         | 25 °C | 2 h    | 7% ( <b>18</b> )+ 13% ( <b>19</b> )   |
| 8 | MeI | KO <sup>t</sup> Bu | 1,4-dioxane | 25 °C | 2 h    | 11% ( <b>18</b> )+ multitude of spots |

<sup>a</sup>all reactions were done using 0.12 mmol of substrate and yields are reported after column purification.

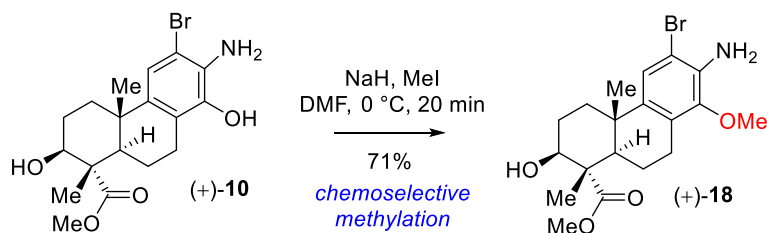

In an oven dried round-bottom flask (+)-**10** (179 mg, 0.449 mmol, 1.0 equiv.) was taken in dry DMF (4 mL) under argon atmosphere and to it NaH (48.5 mg, 2.022 mmol, 4.5 equiv.) was added at 0 °C. After 10 min. MeI (31.2  $\mu$ L, 0.494 mmol, 1.1 equiv.) was added to the reaction mixture in dropwise manner at 0 °C and the reaction mixture was stirred at the same temperature for another 20 min. After complete consumption of starting materials the reaction mixture was diluted with water (2 mL) and extracted with 50% EtOAc in *n*-hexane (6 mL X 2). The combined organic layers were dried over anhydrous Na<sub>2</sub>SO<sub>4</sub>, and concentrated in a rotary evaporator under reduced pressure. The residue was purified by silica gel column chromatography with 25% EtOAc in *n*-hexane to afford (+)-**18** as yellow oil (131 mg, 71% yield).

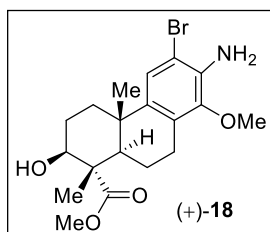

**Methyl** (1*S*,2*S*,4*aS*,10*aR*)-7-amino-6-bromo-2-hydroxy-8-methoxy-1,4*a*-dimethyl-1,2,3,4,4*a*,9,10,10*a*-octahydrophenanthrene-1-carboxylate [(+)-**18**]: (+)-**18** was obtained as a yellow oil (0.449 mmol scale, 131 mg, 71% yield); *R*<sub>f</sub> = 0.3 (30% EtOAc in *n*-hexane).

<sup>1</sup>H NMR (500 MHz, CDCl<sub>3</sub>):  $\delta$  7.09 (s, 1H), 4.04 (dd, *J* = 11.8, 4.5 Hz, 1H), 3.76 (s, 3H), 3.73 (s, 3H), 2.97 – 2.90 (m, 1H), 2.71 – 2.62 (m, 1H), 2.25 (dt, *J* = 13.1, 3.4 Hz, 1H), 2.09 – 2.02

(m, 1H), 1.92 – 1.86 (m, 1H), 1.86 – 1.81 (m, 1H), 1.80 – 1.76 (m, 1H), 1.62 (dd,  $J = 13.3, 3.6$  Hz, 1H), 1.46 (ddt,  $J = 13.4, 7.9, 1.9$  Hz, 1H), 1.25 (s, 3H), 1.19 (s, 3H).

$^{13}\text{C}$  NMR (125 MHz,  $\text{CDCl}_3$ ):  $\delta$  177.8, 144.7, 140.7, 135.8, 128.0, 123.8, 107.5, 75.2, 58.5, 53.6, 52.3, 45.4, 36.9, 36.7, 27.3, 25.4, 24.3, 20.7, 10.7.

IR (neat)  $\nu_{\text{max}}$  3501, 3435, 3379, 1778, 1702, 1656, 1452, 1248, 693  $\text{cm}^{-1}$ .

HRMS (ESI)  $m/z$ :  $[\text{M} + \text{H}]^+$  calcd. for  $[\text{C}_{19}\text{H}_{26}\text{BrO}_4\text{N} + \text{H}]^+$  412.1123, found 412.1136.

$[\alpha]_{589}^{25} = +34.0$  ( $c = 0.97$ ,  $\text{CHCl}_3$ ).

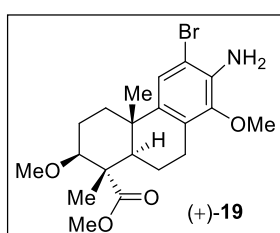

**Methyl (1*S*,2*S*,4*aS*,10*aR*)-7-amino-6-bromo-2,8-dimethoxy-1,4*a*-dimethyl-1,2,3,4,4*a*,9,10,10*a*-octahydrophenanthrene-1-carboxylate [(+)-19]:** (+)-19 was obtained as a colorless oil (0.449 mmol scale, 24.8 mg, 13% yield);  $R_f = 0.28$  (30% EtOAc in *n*-hexane).

$^1\text{H}$  NMR (500 MHz,  $\text{CDCl}_3$ ):  $\delta$  7.10 (s, 1H), 4.22 – 3.92 (m, 2H), 3.74 (s, 3H), 3.73 (s, 3H), 3.66 (dd,  $J = 11.4, 4.2$  Hz, 1H), 3.32 (s, 3H), 2.96 – 2.87 (m, 1H), 2.67 – 2.58 (m, 1H), 2.31 – 2.24 (m, 1H), 2.09 – 2.02 (m, 1H), 2.00 (dd,  $J = 12.6, 2.2$  Hz, 1H), 1.87 – 1.77 (m, 1H), 1.68 – 1.58 (m, 2H), 1.41 – 1.34 (m, 1H), 1.22 (s, 3H), 1.18 (s, 3H).

$^{13}\text{C}$  NMR (125 MHz,  $\text{CDCl}_3$ ):  $\delta$  178.1, 144.7, 140.8, 135.8, 127.9, 123.8, 107.5, 84.5, 58.5, 57.0, 53.1, 52.1, 46.3, 36.8, 36.8, 25.4, 24.2, 22.8, 20.2, 11.2.

IR (neat)  $\nu_{\text{max}}$  3498, 3415, 3356, 1793, 1710, 1656, 1452, 1248, 1179, 721  $\text{cm}^{-1}$ .

HRMS (ESI)  $m/z$ :  $[\text{M} + \text{H}]^+$  calcd. for  $[\text{C}_{20}\text{H}_{28}\text{BrO}_4\text{N} + \text{H}]^+$  426.1280, found 426.1274.

$[\alpha]_{589}^{25} = +49.0$  ( $c = 0.63$ ,  $\text{CHCl}_3$ ).

**Suzuki-Miyaura Coupling of (+)-18:**

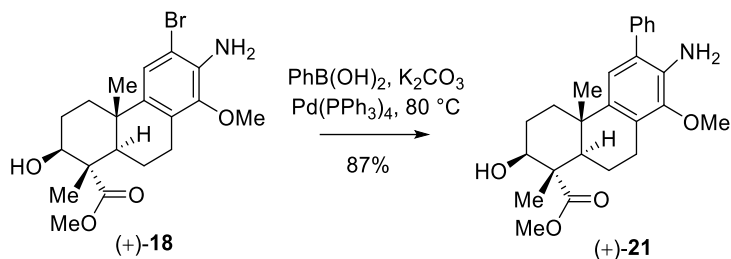

A round-bottom flask was charged with (+)-**18** (172 mg, 0.417 mmol, 1.0 equiv.) and benzene boronic acid (61 mg, 0.501 mmol, 1.2 equiv.) in a mixture of benzene (4 mL), EtOH (1 mL), and water (1 mL) at room temperature under argon atmosphere. Next, potassium carbonate (231 mg, 1.67 mmol, 4.0 equiv.) was added to the reaction mixture followed by the addition of catalyst, tetrakis(triphenylphosphine)palladium(0) (9.6 mg, 0.008 mmol, 0.02 equiv.) at the same temperature. Then the reaction mixture was placed on a pre-heated oil bath maintaining temperature of 80 °C. Upon completion of the reaction (10 h), as monitored by TLC analysis, it was extracted with 50% EtOAc in *n*-hexane (6 mL X 3). The combined organic layers were washed with brine (4 mL X 1) and dried over Na<sub>2</sub>SO<sub>4</sub> and concentrated in a rotary evaporator under reduced pressure. The crude product was purified by flash chromatography with 30% EtOAc in *n*-hexane to furnish (+)-**21** as white foam (148.5 g, 87% yield).

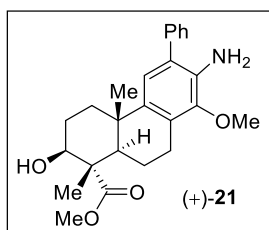

**Methyl (1S,2S,4aS,10aR)-7-amino-2-hydroxy-8-methoxy-1,4a-dimethyl-6-phenyl-1,2,3,4,4a,9,10,10a-octahydrophenanthrene-1-carboxylate [(+)-21]:** (+)-**21** was obtained as a white foam (0.417 mmol scale, 148.5 mg, 87% yield);  $R_f = 0.32$  (30% EtOAc in *n*-hexane).

<sup>1</sup>H NMR (500 MHz, CDCl<sub>3</sub>): δ 7.89 – 7.85 (m, 1H), 7.48 – 7.45 (m, 3H), 7.40 – 7.34 (m, 2H), 6.86 (s, 1H), 4.10 – 4.04 (m, 1H), 3.80 (s, 3H), 3.76 (s, 3H), 3.07 – 3.00 (m, 1H), 2.79 (ddd,  $J = 17.7, 11.5, 7.7$  Hz, 1H), 2.31 (dt,  $J = 13.2, 3.4$  Hz, 1H), 2.15 (dd,  $J = 12.5, 2.1$  Hz, 1H), 1.90 – 1.85 (m, 2H), 1.81 – 1.76 (m, 1H), 1.69 – 1.66 (m, 1H), 1.53 – 1.48 (m, 1H), 1.28 (s, 3H), 1.25 (s, 3H).

<sup>13</sup>C NMR (125 MHz, CDCl<sub>3</sub>): δ 177.9, 144.4, 139.7, 139.6, 134.7, 129.1, 128.8, 128.6, 127.8, 127.1, 126.8, 121.7, 119.8, 75.3, 58.4, 53.7, 52.3, 45.6, 37.0, 36.6, 27.4, 25.5, 24.5, 20.9, 10.7.

**IR** (neat)  $\nu_{\max}$  3496, 3389, 2913, 2863, 1710, 1569, 1455, 1243, 915, 540  $\text{cm}^{-1}$ .

**HRMS** (ESI)  $m/z$ :  $[M+H]^+$  calcd. for  $[\text{C}_{25}\text{H}_{31}\text{O}_4\text{N} + \text{H}]^+$  410.2331, found 410.2345.

$[\alpha]_{589}^{25} = +30.5$  ( $c = 0.79$ ,  $\text{CHCl}_3$ )

### Synthesis of 2-phenylacetanilide [(+)-22]:

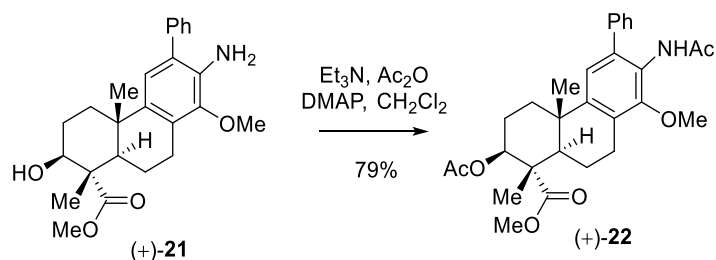

In an oven dried round-bottom flask, (+)-**21** (132 mg, 0.322 mmol, 1.0 equiv.) was taken in dry  $\text{CH}_2\text{Cl}_2$  (6 mL). To the solution was added  $\text{Et}_3\text{N}$  (139  $\mu\text{L}$ , 0.998 mmol., 3.1 equiv.) and catalytic amount of DMAP (4 mg, 0.032 mmol., 0.1 equiv.) at 25  $^\circ\text{C}$ . Acetic anhydride (82  $\mu\text{L}$ , 0.805 mmol., 2.5 equiv.) was added at 25  $^\circ\text{C}$  and it was allowed to stir until the full consumption of starting material (8 h). Upon completion of the reaction (as monitored by TLC analysis), water (4 mL) was added and then extracted with  $\text{CH}_2\text{Cl}_2$  (6 mL X 2). The organic layers were separated and dried over  $\text{Na}_2\text{SO}_4$  and concentrated on a rotary evaporator under the reduced pressure. The crude bis-acetate was purified by flash column chromatography with 45- 50%  $\text{EtOAc}$  in *n*-hexane to afford (+)-**22** as yellow liquid (125.6 mg, 79% yield).

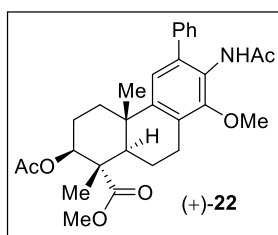

**Methyl (1*S*,2*S*,4*aS*,10*aR*)-7-acetamido-2-acetoxy-8-methoxy-1,4*a*-dimethyl-6-phenyl-1,2,3,4,4*a*,9,10,10*a*-octahydrophenanthrene-1-carboxylate [(+)-22]:** (+)-**22** was obtained as a yellow liquid (0.322 mmol scale, 125.6 mg, 79% yield);  $R_f = 0.25$  (40%  $\text{EtOAc}$  in *n*-hexane).

**$^1\text{H NMR}$**  (400 MHz,  $\text{CDCl}_3$ ):  $\delta$  7.38 – 7.30 (m, 5H), 7.00 (s, 1H), 6.67 (s, 1H), 5.20 (dd,  $J = 11.2, 4.4$  Hz, 1H), 3.71 (s, 3H), 3.67 (s, 3H), 3.03 – 2.96 (m, 1H), 2.79 – 2.70 (m, 1H), 2.31 (d,  $J = 11.9$  Hz, 1H), 2.23 – 2.20 (m, 1H), 1.99 (s, 3H), 1.97 (s, 3H), 1.81 (s, 1H), 1.75 (s, 2H), 1.65 (s, 2H), 1.29 (s, 3H), 1.24 (s, 3H).

$^{13}\text{C}$  NMR (126 MHz,  $\text{CDCl}_3$ ):  $\delta$  176.4, 170.1, 169.6, 153.6, 149.2, 139.7, 138.8, 129.0, 128.6, 128.3, 127.2, 124.8, 122.2, 76.7, 60.0, 52.5, 52.0, 45.2, 37.1, 36.4, 25.1, 24.5, 24.0, 23.2, 21.1, 20.5, 11.7.

IR(neat)  $\nu_{\text{max}}$  2971, 2755, 1816, 1739, 1627, 1201, 1069, 981  $\text{cm}^{-1}$ .

HRMS(ESI)  $m/z$ :  $[\text{M} + \text{H}]^+$  calcd. for  $[\text{C}_{29}\text{H}_{35}\text{NO}_6 + \text{H}]^+$  494.2543, found 494.2564.

$[\alpha]_{589}^{25} = +91.0$  ( $c = 0.73$ ,  $\text{CHCl}_3$ )

### Buchwald's Oxidative C-N bond Formation of (+)-22:

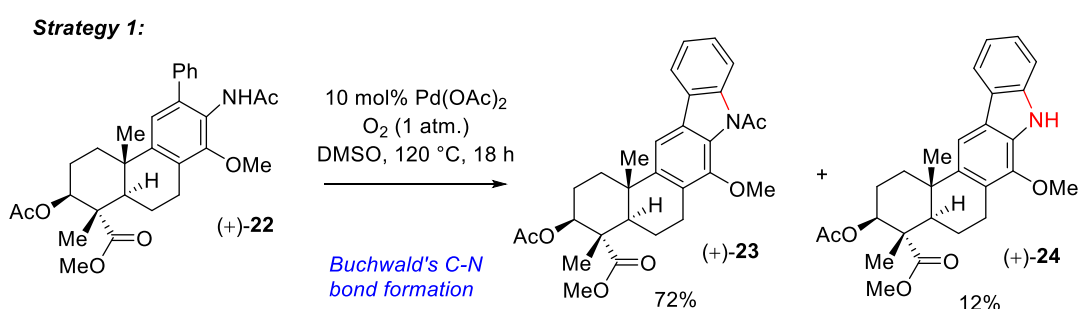

2-Phenyl acetanilide derivative (+)-22 (102 mg, 0.207 mmol, 1.0 equiv.) was taken in DMSO (5 mL) under argon atmosphere and  $\text{Pd}(\text{OAc})_2$  (4.7 mg, 0.021 mmol, 0.1 equiv.) was added to it. The reaction mixture was sonicated and degassed and refilled with  $\text{O}_2$  from the double manifold (this sequence was carried out 3 times). The sealed tube was set into a pre-heated oil bath at 120 °C and stirred for 18 h (complete consumption of starting materials). After cooling it to room temperature, the reaction mixture was diluted with water (6 mL) and extracted with 50% EtOAc in *n*-hexane (8 mL X 3). The combined organic layers were dried over anhydrous  $\text{Na}_2\text{SO}_4$ , and concentrated in a rotary evaporator under reduced pressure. The residue was purified by silica gel column chromatography with 10% EtOAc in *n*-hexane to afford to provide (+)-23 as brown foam (67 mg, 72% yield) and (+)-24 as white foam (10 mg, 12% yield).

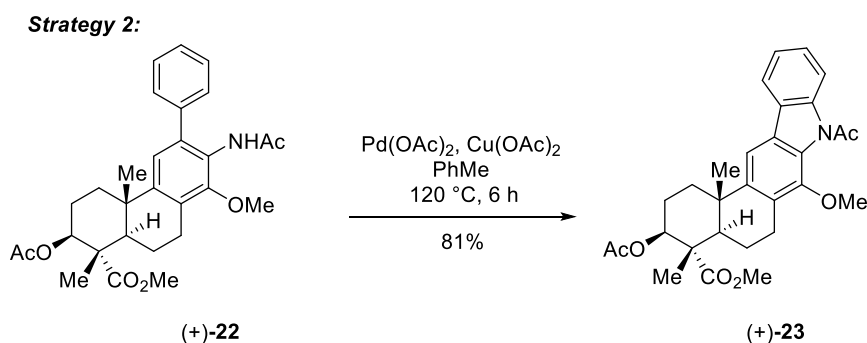

In an oven-dried sealed tube, compound (+)-**22** (40.0 mg, 0.081 mmol, 1.0 equiv.) was taken in dry toluene (2 mL). The reaction mixture was degassed by purging Argon gas for 10 min after that purged with O<sub>2</sub> gas for 20 min. Next, Pd(OAc)<sub>2</sub> (2.0 mg, 0.0081 mmol, 0.1 equiv.), and Cu(OAc)<sub>2</sub> (3.0 mg, 0.016 mmol, 0.2 equiv.) were added to the solution and the tube was sealed. Then the reaction mixture was allowed to heat to 120 °C on a preheated oil bath for 6 h. After completion of the reaction (monitored by TLC) the crude reaction mixture was diluted with water (3 mL) and EtOAc (3 mL). The resulting biphasic mixture was then transferred to a separatory funnel. The organic phase was collected, and the aqueous phase was further extracted with EtOAc (5 mL X 2). The combined organic layer was concentrated under vacuum and the crude product was purified by column chromatography (10% Ethyl acetate in *n*-hexane) to afford (+)-**23**.

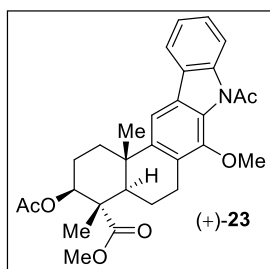

**Methyl** (3*S*,4*S*,4*aR*,13*bS*)-**3-acetoxy-8-acetyl-7-methoxy-4,13*b*-dimethyl-2,3,4,4*a*,5,6,8,13*b*-octahydro-1*H*-naphtho[2,1-*b*]carbazole-4-carboxylate** [(+)-**23**]: (+)-**23** was obtained as light yellow coloured liquid (strategy 1: 0.207 mmol scale, 67 mg, 72% yield and strategy 2: 0.081 mmol scale of reaction; 32.0 mg; 81% yield); *R*<sub>f</sub> = 0.30 (15% EtOAc in *n*-hexane).

<sup>1</sup>H NMR (400 MHz, CDCl<sub>3</sub>): δ 8.29 – 8.27 (m, 1H), 7.88 (ddd, *J* = 7.6, 1.4, 0.7 Hz, 1H), 7.64 (s, 1H), 7.45 – 7.41 (m, 1H), 7.35 – 7.31 (m, 1H), 5.27 – 5.23 (m, 1H), 3.69 (s, 3H), 3.68 (s, 3H), 3.13 (ddd, *J* = 18.1, 6.8, 1.5 Hz, 1H), 2.89 – 2.80 (m, 1H), 2.61 (s, 3H), 2.53 (dd, *J* = 9.8,

3.5 Hz, 1H), 2.29 – 2.25 (m, 1H), 2.06 – 2.03 (m, 1H), 2.02 (s, 3H), 1.95 – 1.91 (m, 1H), 1.86 (d,  $J = 10.1$  Hz, 2H), 1.52 – 1.47 (m, 1H), 1.34 (s, 3H), 1.32 (s, 3H).

$^{13}\text{C}$  NMR (126 MHz,  $\text{CDCl}_3$ ):  $\delta$  176.4, 172.7, 170.1, 146.7, 145.1, 140.6, 129.0, 128.0, 127.7, 127.5, 125.9, 123.5, 119.2, 115.6, 111.3, 76.8, 59.0, 52.5, 52.1, 45.4, 37.3, 37.0, 26.6, 25.5, 24.7, 24.1, 21.12, 20.6, 11.8.

IR(neat)  $\nu_{\text{max}}$  3410, 2873, 2847, 1745, 1683, 1499, 1278, 968  $\text{cm}^{-1}$ .

HRMS(ESI)  $m/z$ :  $[\text{M} + \text{H}]^+$  calcd. for  $[\text{C}_{29}\text{H}_{33}\text{NO}_6 + \text{H}]^+$  492.2386, found 492.2384.

$[\alpha]_{589}^{25} = +53.0$  ( $c = 0.63$ ,  $\text{CHCl}_3$ )

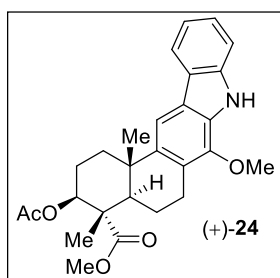

**Methyl (3*S*,4*S*,4*aR*,13*bS*)-3-hydroxy-7-methoxy-4,13*b*-dimethyl-2,3,4,4*a*,5,6,8,13*b*-octahydro-1*H*-naphtho[2,1-*b*]carbazole-4-carboxylate [(+)-24]:** (+)-24 was obtained as a white foam (0.207 mmol scale, 10 mg, 12% yield);  $R_f = 0.3$  (30% EtOAc in *n*-hexane).

$^1\text{H}$  NMR (500 MHz,  $\text{CDCl}_3$ ):  $\delta$  9.35 (s, 1H), 8.61 (d,  $J = 8.3$  Hz, 1H), 8.28 (s, 1H), 8.10 (d,  $J = 7.9$  Hz, 1H), 7.90 (q,  $J = 6.2, 5.0$  Hz, 1H), 7.79 – 7.71 (m, 1H), 5.30 (dd,  $J = 11.5, 4.7$  Hz, 1H), 4.15 (s, 3H), 3.73 (s, 3H), 3.72 – 3.68 (m, 1H), 3.36 – 3.28 (m, 1H), 3.04 (ddd,  $J = 18.6, 11.1, 8.1$  Hz, 1H), 2.69 (dd,  $J = 9.4, 3.3$  Hz, 1H), 2.37 (dd,  $J = 12.7, 2.3$  Hz, 1H), 2.06 (s, 3H), 2.04 – 1.96 (m, 3H), 1.57 (dd,  $J = 13.4, 8.0$  Hz, 1H), 1.40 (d,  $J = 3.4$  Hz, 6H).

$^{13}\text{C}$  NMR (125 MHz,  $\text{CDCl}_3$ ):  $\delta$  176.3, 170.1, 151.6, 133.4, 129.9, 127.8, 125.5, 123.6, 121.9, 120.1, 119.4, 115.3, 112.8, 111.5, 76.7, 61.9, 52.5, 52.1, 45.1, 37.8, 36.9, 25.6, 24.5, 24.1, 21.1, 20.4, 11.8.

IR (neat)  $\nu_{\text{max}}$  3403, 3387, 2947, 2858, 1705, 1596, 1193, 783  $\text{cm}^{-1}$ .

HRMS (ESI)  $m/z$ :  $[\text{M} + \text{H}]^+$  calcd. for  $[\text{C}_{27}\text{H}_{32}\text{O}_5\text{N} + \text{H}]^+$  450.2281, found 450.2263.

$[\alpha]_{589}^{25} = +36.5$  ( $c = 0.52$ ,  $\text{CHCl}_3$ )

## Synthesis of acetanilide (+)-22a:

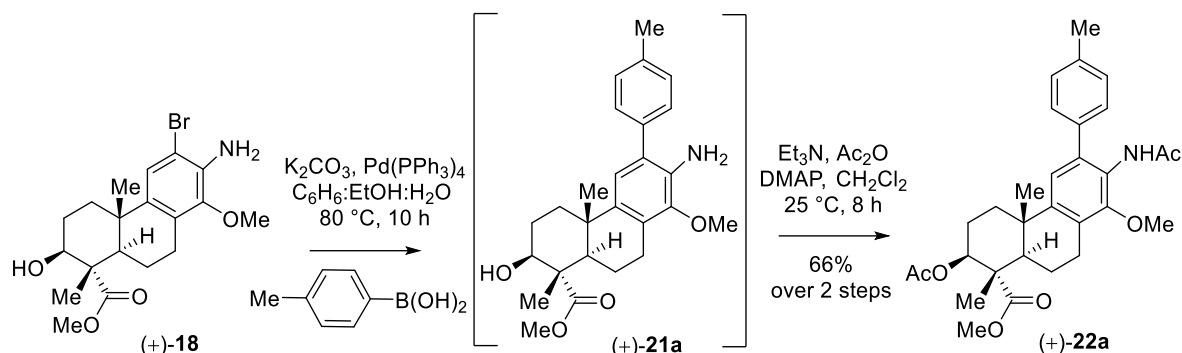

A round-bottom flask was charged with (+)-18 (50 mg, 0.121 mmol, 1.0 equiv.) and *p*-tolylboronic acid (20 mg, 0.146 mmol, 1.2 equiv.) in a mixture of benzene (3 mL), EtOH (1 mL), and water (1 mL) at room temperature under argon atmosphere. Next, potassium carbonate (67 mg, 0.49 mmol, 4.0 equiv.) was added to the reaction mixture followed by the addition of catalyst, tetrakis(triphenylphosphine)palladium(0) (2.8 mg, 0.0025 mmol, 0.02 equiv.) at the same temperature. Then the reaction mixture was placed on a pre-heated oil bath maintaining temperature of  $80\text{ }^\circ\text{C}$ . Upon completion of the reaction (10 h), as monitored by TLC analysis, it was extracted with 50% EtOAc in *n*-hexane (4 mL X 3). The combined organic layers were washed with brine (2 mL X 1) and dried over  $\text{Na}_2\text{SO}_4$  and concentrated in a rotary evaporator under reduced pressure. The crude product was charged for next step.

In an oven dried round-bottom flask, (+)-21a (0.121 mmol, 1.0 equiv.) was taken in dry  $\text{CH}_2\text{Cl}_2$  (3 mL). To the solution was added  $\text{Et}_3\text{N}$  (52  $\mu\text{L}$ , 0.375 mmol., 3.1 equiv.) and catalytic amount of DMAP (1.5 mg, 0.0121 mmol., 0.1 equiv.) at  $25\text{ }^\circ\text{C}$ . Acetic anhydride (29  $\mu\text{L}$ , 0.303 mmol., 2.5 equiv.) was added at  $25\text{ }^\circ\text{C}$  and it was allowed to stir until the full consumption of starting material (8 h). Upon completion of the reaction (as monitored by TLC analysis), water (2 mL) was added and then extracted with  $\text{CH}_2\text{Cl}_2$  (4 mL X 2). The organic layers were separated and dried over  $\text{Na}_2\text{SO}_4$  and concentrated on a rotary evaporator under the reduced pressure. The crude bis-acetate was purified by flash column chromatography with 45-50% EtOAc in *n*-hexane to afford (+)-22a as yellow liquid (41 mg, 66% yield over two steps).

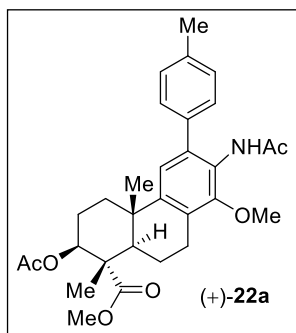

**Methyl (1*S*,2*S*,4*aS*,10*aR*)-7-acetamido-2-acetoxy-8-methoxy-1,4*a*-dimethyl-6-(*p*-tolyl)-1,2,3,4,4*a*,9,10,10*a*-octahydrophenanthrene-1-carboxylate [(+)-21*a*]:** (+)-21*a* was obtained as yellow liquid (0.121 mmol scale, 41 mg, 66% yield over two steps);  $R_f = 0.25$  (40% EtOAc in *n*-hexane).

**$^1\text{H NMR}$**  (400 MHz,  $\text{CDCl}_3$ ):  $\delta$  7.19 (d,  $J = 10.0$  Hz, 4H), 6.98 (s, 1H), 6.72 (s, 1H), 5.20 (dd,  $J = 11.1, 4.4$  Hz, 1H), 3.70 (s, 3H), 3.66 (s, 3H), 3.02 – 2.95 (m, 1H), 2.77 – 2.69 (m, 1H), 2.36 (s, 3H), 2.32 – 2.27 (m, 1H), 2.22 – 2.18 (m, 1H), 1.99 (s, 6H), 1.82 – 1.70 (m, 4H), 1.46 – 1.40 (m, 1H), 1.29 (s, 3H), 1.23 (s, 3H).

**$^{13}\text{C}\{^1\text{H}\}$  NMR** (101 MHz,  $\text{CDCl}_3$ ):  $\delta$  176.4, 170.1, 169.6, 153.6, 149.2, 138.7, 136.9, 136.8, 129.4, 129.0, 128.4, 124.8, 122.2, 77.3, 59.9, 52.4, 52.1, 45.2, 37.1, 36.7, 36.4, 25.1, 24.7, 24.5, 23.99, 23.2, 21.2, 21.2, 20.5, 11.7.

**IR** (neat)  $\nu_{\text{max}}$ : 3491, 3384, 2917, 2863, 1730, 1579, 1465, 1246, 928, 565  $\text{cm}^{-1}$ .

**HRMS** (ESI)  $m/z$ :  $[\text{M} + \text{H}]^+$  calcd. for  $[\text{C}_{30}\text{H}_{37}\text{O}_6\text{N} + \text{H}]^+$  508.2699, found 508.2695.

$[\alpha]_{589}^{25} = +36.8$  ( $c = 0.79$ ,  $\text{CHCl}_3$ ).

### Synthesis of (+)-22*a* through oxidative C-N bond formation of (+)-22*a*:

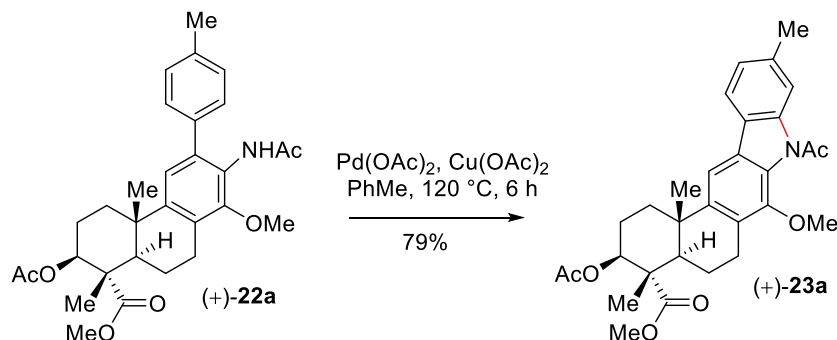

In an oven-dried sealed tube, compound (+)-**22a** (30.0 mg, 0.059 mmol, 1.0 equiv.) was taken in dry toluene (2 mL). The reaction mixture was degassed by purging Argon gas for 10 min after that purged with O<sub>2</sub> gas for 20 min. Next, Pd(OAc)<sub>2</sub> (1.3 mg, 0.0059 mmol, 0.1 equiv.), and Cu(OAc)<sub>2</sub> (2.1 mg, 0.012 mmol, 0.2 equiv.) were added to the solution and the tube was sealed. Then the reaction mixture was allowed to heat to 120 °C on a preheated oil bath for 6 h. After completion of the reaction (monitored by TLC) the crude reaction mixture was diluted with water (2 mL) and EtOAc (3 mL). The resulting biphasic mixture was then transferred to a separatory funnel. The organic phase was collected, and the aqueous phase was further extracted with EtOAc (3 mL X 2). The combined organic layer was concentrated under vacuum and the crude product was purified by column chromatography (15% Ethyl acetate in *n*-hexane) to afford (+)-**23a** (23.5 mg, 79% yield).

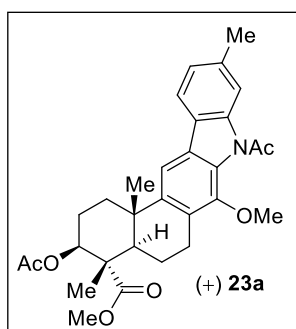

**Methyl (3*S*,4*S*,4*a**R*,13*b**S*)-8-acetyl-3-hydroxy-7-methoxy-4,10,13*b*-trimethyl-2,3,4,4*a*,5,6,8,13*b*-octahydro-1*H*-naphtho[2,1-*b*]carbazole-4-carboxylate [(+)-**23a**]:** (+)-**23a** was obtained as light yellow coloured liquid (0.059 mmol scale of reaction; 23.5 mg; 79% yield); *R<sub>f</sub>* = 0.30 (15% EtOAc in *n*-hexane).

**<sup>1</sup>H NMR** (400 MHz, CDCl<sub>3</sub>): δ 8.12 – 8.10 (m, 1H), 7.74 (d, *J* = 7.8 Hz, 1H), 7.59 (s, 1H), 7.15 (ddt, *J* = 7.8, 1.5, 0.6 Hz, 1H), 5.28 – 5.21 (m, 1H), 3.68 (s, 3H), 3.67 (s, 3H), 3.11 (ddd, *J* = 18.1, 6.9, 1.6 Hz, 1H), 2.84 (ddd, *J* = 18.4, 11.3, 7.9 Hz, 1H), 2.60 (s, 3H), 2.54 – 2.51 (m, 1H), 2.50 (s, 3H), 2.27 (dd, *J* = 12.6, 2.3 Hz, 1H), 2.07 – 2.02 (m, 1H), 2.01 (s, 3H), 1.97 – 1.84 (m, 3H), 1.52 – 1.46 (m, 1H), 1.34 (s, 3H), 1.31 (s, 3H).

**<sup>13</sup>C{<sup>1</sup>H} NMR** (101 MHz, CDCl<sub>3</sub>): δ 176.4, 172.9, 170.1, 146.6, 145.1, 140.9, 137.8, 129.0, 127.8, 127.4, 124.7, 123.5, 118.8, 115.8, 111.0, 76.8, 58.9, 52.4, 52.1, 45.4, 37.3, 37.0, 26.6, 25.5, 24.6, 24.1, 22.2, 21.1, 20.7, 11.8.

IR(neat)  $\nu_{\text{max}}$ : 3417, 2853, 2897, 1725, 1689, 1501, 1278, 978  $\text{cm}^{-1}$ .

HRMS(ESI)  $m/z$ :  $[M+H]^+$  calcd. for  $[\text{C}_{30}\text{H}_{35}\text{O}_6\text{N} + \text{H}]^+$  506.2543, found 506.2547.

$[\alpha]_{589}^{25} = +56.0$  ( $c = 0.63$ ,  $\text{CHCl}_3$ ).

### Synthesis of pentacyclic carbazole derivative (+)-23a:

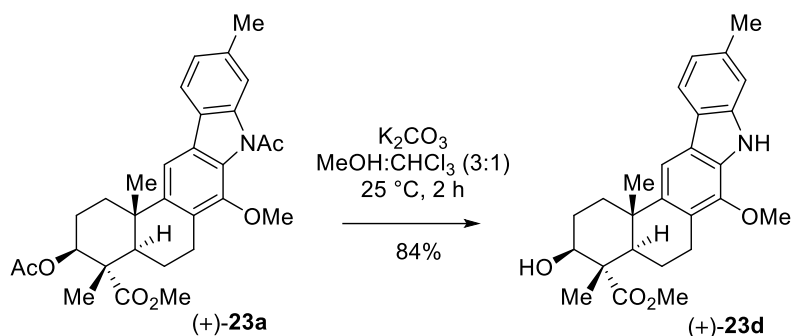

In an oven-dried round bottom flask compound (+)-23a (15.0 mg, 0.030 mmol, 1.0 equiv.) was taken in a mixture of methanol and chloroform [ $\text{MeOH}:\text{CHCl}_3$  (3:1)]. To the solution  $\text{K}_2\text{CO}_3$  (9.0 mg, 0.065 mmol, 2.2 equiv.) was added and then the reaction mixture was stirred at 25 °C for 2 h. After completion of the reaction (monitored by TLC) the reaction mixture was directly evaporated under reduced pressure. The mixture was then extracted with EtOAc (5 mL X 3). The combined organic layers were washed with brine and dried over  $\text{Na}_2\text{SO}_4$  and concentrated under reduced pressure. Then the crude product was purified by flash chromatography with 30% EtOAc in *n*-hexane to afford (+)-23d as yellow liquid.

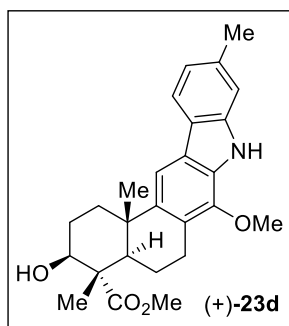

**Methyl (3*S*,4*S*,4*aR*,13*bS*)-3-hydroxy-7-methoxy-4,10,13*b*-trimethyl-2,3,4,4*a*,5,6,8,13*b*-octahydro-1*H*-naphtho[2,1-*b*]carbazole-4-carboxylate [(+)-23d]:** (+)-23d was obtained as yellow liquid (0.030 mmol scale of reaction; 10.6 mg, 85% yields).  $R_f = 0.3$  (30% EtOAc in *n*-hexane).

**<sup>1</sup>H NMR** (400 MHz, CDCl<sub>3</sub>): δ 7.88 (s, 1H), 7.85 (d, *J* = 7.9 Hz, 1H), 7.67 (s, 1H), 7.19 (s, 1H), 7.01 (d, *J* = 7.9 Hz, 1H), 4.08 (dd, *J* = 11.1, 4.5 Hz, 1H), 3.91 (s, 3H), 3.74 (s, 3H), 3.16 (dd, *J* = 17.5, 6.6 Hz, 1H), 2.91 (ddd, *J* = 18.1, 11.2, 7.8 Hz, 1H), 2.56 – 2.51 (m, 1H), 2.50 (s, 3H), 2.19 (dd, *J* = 12.5, 2.3 Hz, 1H), 1.96 – 1.91 (m, 2H), 1.81 (s, 2H), 1.55 – 1.50 (m, 1H), 1.29 (s, 3H), 1.29 (s, 3H).

**IR**(neat)  $\nu_{\max}$ : 3525, 2944, 1655, 1460, 1445, 1172, 823, 776, 665 cm<sup>-1</sup>.

**HRMS**(ESI) *m/z*: [M+ Na]<sup>+</sup> calcd. for [C<sub>26</sub>H<sub>31</sub>NO<sub>5</sub> + H]<sup>+</sup> 422.2331, found 422.2325.

[ $\alpha$ ]<sub>D</sub><sup>25</sup><sub>589</sub> = +38.7 (*c* = 0.43, CH<sub>3</sub>OH).

### Synthesis of acetanilide (+)-22b:

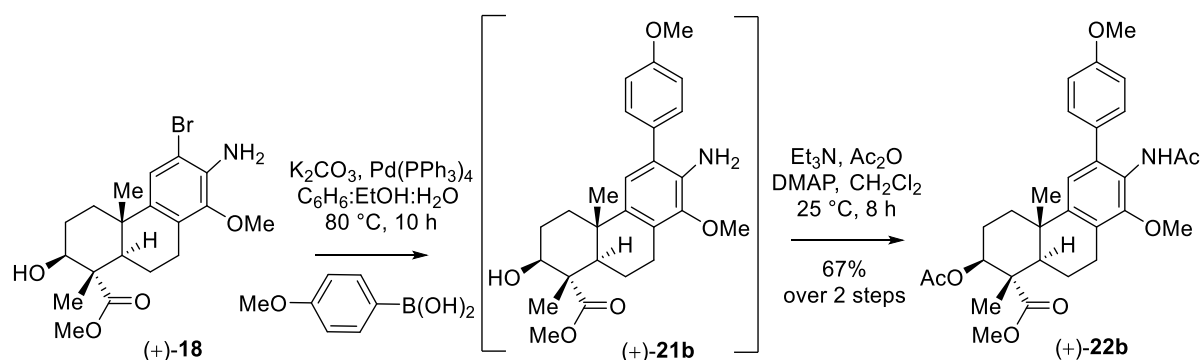

A round-bottom flask was charged with (+)-**18** (50 mg, 0.121 mmol, 1.0 equiv.) and benzene boronic acid (22 mg, 0.146 mmol, 1.2 equiv.) in a mixture of benzene (3 mL), EtOH (1 mL), and water (1 mL) at room temperature under argon atmosphere. Next, potassium carbonate (67 mg, 0.49 mmol, 4.0 equiv.) was added to the reaction mixture followed by the addition of catalyst, tetrakis(triphenylphosphine)palladium(0) (2.8 mg, 0.0025 mmol, 0.02 equiv.) at the same temperature. Then the reaction mixture was placed on a pre-heated oil bath maintaining temperature of 80 °C. Upon completion of the reaction (10 h), as monitored by TLC analysis, it was extracted with 60% EtOAc in *n*-hexane (4 mL X 3). The combined organic layers were washed with brine (2 mL X 1) and dried over Na<sub>2</sub>SO<sub>4</sub> and concentrated in a rotary evaporator under reduced pressure. The crude product was charged for next step.

Next, in an oven dried round-bottom flask, (+)-**21b** (0.121 mmol, 1.0 equiv.) was taken in dry CH<sub>2</sub>Cl<sub>2</sub> (3 mL). To the solution was added Et<sub>3</sub>N (52 μL, 0.375 mmol., 3.1 equiv.) and catalytic amount of DMAP (1.5 mg, 0.0121 mmol., 0.1 equiv.) at 25 °C. Acetic anhydride (29 μL, 0.303 mmol., 2.5 equiv.) was added at 25 °C and it was allowed to stir until the full consumption of starting material (8 h). Upon completion of the reaction (as monitored by TLC analysis), water

(2 mL) was added and then extracted with CH<sub>2</sub>Cl<sub>2</sub> (4 mL X 2). The organic layers were separated and dried over Na<sub>2</sub>SO<sub>4</sub> and concentrated on a rotary evaporator under the reduced pressure. The crude bis-acetate was purified by flash column chromatography with 45- 50% EtOAc in *n*-hexane to afford (+)-**22b** as yellow liquid (41.6 mg, 67% yield over two steps).

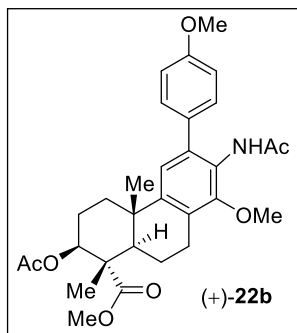

**Methyl (1*S*,2*S*,4*aS*,10*aR*)-7-acetamido-2-acetoxy-8-methoxy-6-(4-methoxyphenyl)-1,4a-dimethyl-1,2,3,4,4a,9,10,10a-octahydrophenanthrene-1-carboxylate [(+)-**22b**]:** (+)-**22b** was obtained as a white foam (0.121 mmol scale, 41.6 mg, 67% yield); *R<sub>f</sub>* = 0.35 (60% EtOAc in *n*-hexane).

**<sup>1</sup>H NMR** (400 MHz, CDCl<sub>3</sub>): δ 7.26 (s, 1H), 7.06 – 6.90 (m, 4H), 6.78 (s, 1H), 5.23 (dd, *J* = 11.4, 4.4 Hz, 1H), 3.85 (s, 3H), 3.73 (s, 3H), 3.70 (s, 3H), 3.02 (dd, *J* = 18.0, 6.5 Hz, 1H), 2.77 (td, *J* = 11.0, 5.7 Hz, 1H), 2.34 (d, *J* = 12.1 Hz, 1H), 2.24 (d, *J* = 12.3 Hz, 1H), 2.02 (s, 6H), 1.90 – 1.81 (m, 2H), 1.77 (d, *J* = 11.2 Hz, 2H), 1.56 – 1.45 (m, 1H), 1.32 (s, 3H), 1.27 (s, 3H).

**<sup>13</sup>C{<sup>1</sup>H} NMR** (101 MHz, CDCl<sub>3</sub>): δ 176.4, 170.1, 169.7, 158.7, 153.7, 149.2, 138.5, 132.1, 130.1, 129.7, 128.3, 124.9, 122.1, 114.2, 113.7, 77.3, 59.9, 55.3, 52.4, 52.1, 45.2, 37.1, 36.4, 25.1, 24.7, 24.5, 24.0, 21.1, 20.5, 11.7.

**IR** (neat)  $\nu_{\max}$ : 3466, 3359, 2933, 2763, 1750, 1519, 1475, 1293, 955, 520 cm<sup>-1</sup>.

**HRMS** (ESI) *m/z*: [M+ H]<sup>+</sup> calcd. for [C<sub>30</sub>H<sub>37</sub>O<sub>7</sub>N + H]<sup>+</sup> 524.2648, found 524.2645.

[ $\alpha$ ]<sub>25</sub><sup>589</sup> = +40.5 (*c* = 0.79, CHCl<sub>3</sub>).

**Synthesis of (+)-**23b** through oxidative C-N bond formation of (+)-**22b**:**

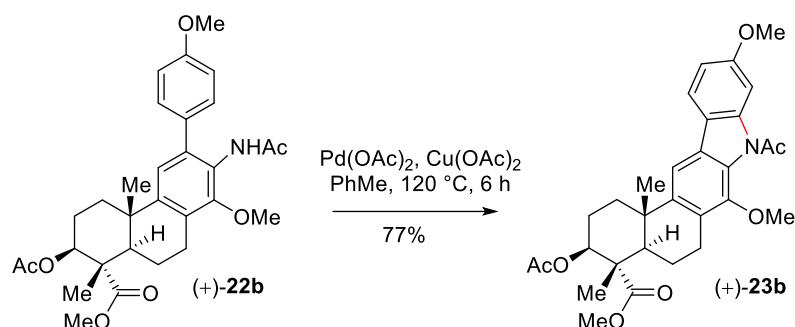

In an oven-dried sealed tube, compound (+)-**22b** (30.0 mg, 0.057 mmol, 1.0 equiv.) was taken in dry toluene (2 mL). The reaction mixture was degassed by purging Argon gas for 10 min after that purged with O<sub>2</sub> gas for 20 min. Next, Pd(OAc)<sub>2</sub> (1.3 mg, 0.0057 mmol, 0.1 equiv.), and Cu(OAc)<sub>2</sub> (2.1 mg, 0.012 mmol, 0.2 equiv.) were added to the solution and the tube was sealed. Then the reaction mixture was allowed to heat to 120 °C on a preheated oil bath for 6 h. After completion of the reaction (monitored by TLC) the crude reaction mixture was diluted with water (2 mL) and EtOAc (3 mL). The resulting biphasic mixture was then transferred to a separatory funnel. The organic phase was collected, and the aqueous phase was further extracted with EtOAc (3 mL X 2). The combined organic layer was concentrated under vacuum and the crude product was purified by column chromatography (20% Ethyl acetate in *n*-hexane) to afford (+)-**23b** (22.8 mg, 77% yield).

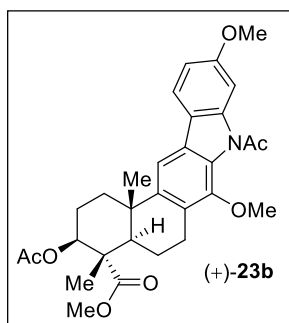

**Methyl** (3*S*,4*S*,4*aR*,13*bS*)-3-acetoxy-8-acetyl-7,10-dimethoxy-4,13*b*-dimethyl-2,3,4,4*a*,5,6,8,13*b*-octahydro-1*H*-naphtho[2,1-*b*]carbazole-4-carboxylate [(+)-**23b**]: (+)-**23b** was obtained as light yellow coloured liquid (0.057 mmol scale of reaction; 22.8 mg; 77% yield); *R<sub>f</sub>* = 0.25 (20% EtOAc in *n*-hexane).

<sup>1</sup>H NMR (500 MHz, CDCl<sub>3</sub>): δ 7.92 (d, *J* = 2.3 Hz, 1H), 7.77 (d, *J* = 8.5 Hz, 1H), 7.57 (s, 1H), 6.96 (dd, *J* = 8.5, 2.3 Hz, 1H), 5.28 (dd, *J* = 11.3, 4.5 Hz, 1H), 3.94 (s, 3H), 3.72 (s, 3H), 3.70 (s, 3H), 3.13 (ddd, *J* = 17.8, 6.8, 1.5 Hz, 1H), 2.87 (ddd, *J* = 18.4, 11.3, 7.8 Hz, 1H), 2.64 (s,

3H), 2.57 – 2.53 (m, 1H), 2.30 (dd,  $J = 12.6, 2.3$  Hz, 1H), 2.10 – 2.06 (m, 1H), 2.05 (s, 3H), 1.96 – 1.87 (m, 3H), 1.52 (dq,  $J = 5.8, 2.0$  Hz, 1H).

$^{13}\text{C}\{^1\text{H}\}$  NMR (101 MHz,  $\text{CDCl}_3$ ):  $\delta$  176.4, 173.0, 170.1, 159.9, 146.7, 145.1, 141.8, 128.9, 127.8, 126.5, 119.8, 119.2, 111.9, 110.5, 100.0, 59.0, 55.7, 52.4, 52.1, 45.4, 37.3, 37.0, 26.6, 25.5, 24.6, 24.1, 21.1, 20.7, 11.8.

IR(neat)  $\nu_{\text{max}}$ : 3430, 2868, 2797, 1795, 1653, 1539, 1278, 978  $\text{cm}^{-1}$ .

HRMS(ESI)  $m/z$ :  $[\text{M} + \text{H}]^+$  calcd. for  $[\text{C}_{30}\text{H}_{35}\text{O}_7\text{N} + \text{H}]^+$  522.2492, found 522.2496.

$[\alpha]_{589}^{25} = +49.0$  ( $c = 0.63$ ,  $\text{CHCl}_3$ ).

### Synthesis of pentacyclic carbazole derivative (+)-**23b**:

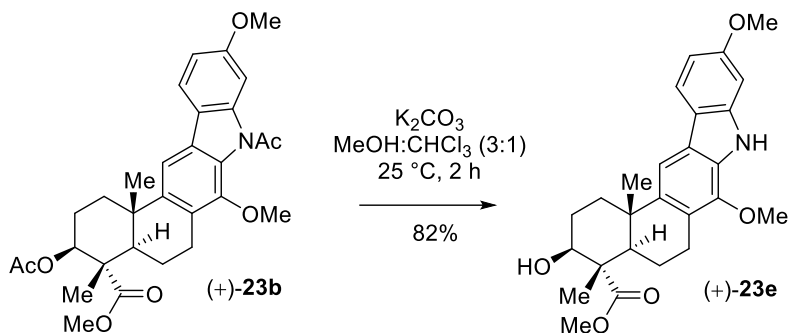

In an oven-dried round bottom flask compound (+)-**23b** (15.0 mg, 0.029 mmol, 1.0 equiv.) was taken in a mixture of methanol and chloroform [ $\text{MeOH}:\text{CHCl}_3$  (3:1)]. To the solution  $\text{K}_2\text{CO}_3$  (8.7 mg, 0.063 mmol, 2.2 equiv.) was added and then the reaction mixture was stirred at 25 °C for 2 h. After completion of the reaction (monitored by TLC) the reaction mixture was directly evaporated under reduced pressure. The mixture was then extracted with EtOAc (5 mL X 3). The combined organic layers were washed with brine and dried over  $\text{Na}_2\text{SO}_4$  and concentrated under reduced pressure. Then the crude product was purified by flash chromatography with 40% EtOAc in *n*-hexane to afford (+)-**23e** as yellow liquid.

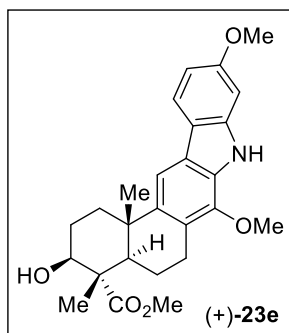

**Methyl (3*S*,4*S*,4*aR*,13*bS*)-3-hydroxy-7,10-dimethoxy-4,13*b*-dimethyl-2,3,4,4*a*,5,6,8,13*b*-octahydro-1*H*-naphtho[2,1-*b*]carbazole-4-carboxylate [(+)-23e]:** (+)-23e was obtained as colorless liquid (0.029 mmol scale of reaction; 10.4 mg, 82% yields).  $R_f = 0.3$  (40% EtOAc in *n*-hexane).

**$^1\text{H NMR}$**  (400 MHz,  $\text{CDCl}_3$ ):  $\delta$  7.93 (s, 1H), 7.83 (d,  $J = 8.5$  Hz, 1H), 7.62 (s, 1H), 6.90 (d,  $J = 2.2$  Hz, 1H), 6.80 (dd,  $J = 8.5, 2.2$  Hz, 1H), 4.08 (dd,  $J = 11.2, 4.6$  Hz, 1H), 3.90 (s, 3H), 3.88 (s, 3H), 3.74 (s, 3H), 3.19 – 3.11 (m, 1H), 2.90 (ddd,  $J = 18.1, 11.2, 7.8$  Hz, 1H), 2.57 – 2.50 (m, 1H), 2.18 (dd,  $J = 12.5, 2.3$  Hz, 1H), 1.96 – 1.89 (m, 2H), 1.84 – 1.77 (m, 2H), 1.54 – 1.49 (m, 1H), 1.29 (s, 3H), 1.29 (s, 3H).

**$^{13}\text{C}\{^1\text{H}\}$  NMR** (101 MHz,  $\text{CDCl}_3$ ):  $\delta$  178.0, 158.9, 142.5, 141.8, 141.2, 130.9, 124.2, 123.8, 120.8, 118.0, 110.7, 107.9, 95.1, 59.8, 55.6, 53.8, 52.3, 45.6, 37.6, 37.4, 27.5, 25.9, 24.4, 21.0, 10.8.

**IR**(neat)  $\nu_{\text{max}}$ : 3537, 2964, 1685, 1360, 1475, 1272, 803, 746, 655  $\text{cm}^{-1}$ .

**HRMS**(ESI)  $m/z$ :  $[\text{M} + \text{H}]^+$  calcd. for  $[\text{C}_{26}\text{H}_{31}\text{NO}_5 + \text{H}]^+$  438.2281, found 438.2275.

$[\alpha]_{\text{D}}^{25} = +42.7$  ( $c = 0.43$ ,  $\text{CH}_3\text{OH}$ ).

### Synthesis of acetanilide (+)-22c:

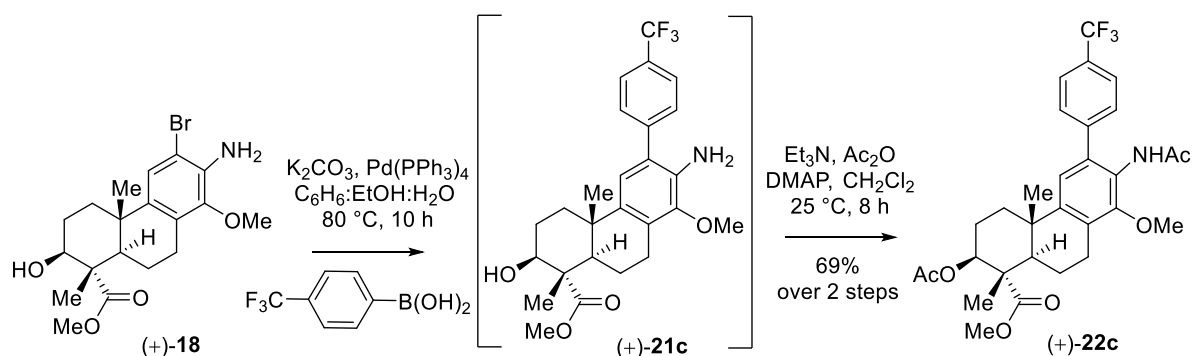

A round-bottom flask was charged with (+)-**18** (50 mg, 0.121 mmol, 1.0 equiv.) and benzene boronic acid (27.7 mg, 0.146 mmol, 1.2 equiv.) in a mixture of benzene (3 mL), EtOH (1 mL), and water (1 mL) at room temperature under argon atmosphere. Next, potassium carbonate (67 mg, 0.49 mmol, 4.0 equiv.) was added to the reaction mixture followed by the addition of catalyst, tetrakis(triphenylphosphine)palladium(0) (2.8 mg, 0.0025 mmol, 0.02 equiv.) at the same temperature. Then the reaction mixture was placed on a pre-heated oil bath maintaining temperature of 80 °C. Upon completion of the reaction (10 h), as monitored by TLC analysis, it was extracted with 60% EtOAc in *n*-hexane (4 mL X 3). The combined organic layers were washed with brine (2 mL X 1) and dried over Na<sub>2</sub>SO<sub>4</sub> and concentrated in a rotary evaporator under reduced pressure. The crude product was charged for next step.

Next, In an oven dried round-bottom flask, (+)-**21C** (0.121 mmol, 1.0 equiv.) was taken in dry CH<sub>2</sub>Cl<sub>2</sub> (3 mL). To the solution was added Et<sub>3</sub>N (52 μL, 0.375 mmol., 3.1 equiv.) and catalytic amount of DMAP (1.5 mg, 0.0121 mmol., 0.1 equiv.) at 25 °C. Acetic anhydride (29 μL, 0.303 mmol., 2.5 equiv.) was added at 25 °C and it was allowed to stir until the full consumption of starting material (8 h). Upon completion of the reaction (as monitored by TLC analysis), water (2 mL) was added and then extracted with CH<sub>2</sub>Cl<sub>2</sub> (4 mL X 2). The organic layers were separated and dried over Na<sub>2</sub>SO<sub>4</sub> and concentrated on a rotary evaporator under the reduced pressure. The crude bis-acetate was purified by flash column chromatography with 45- 50% EtOAc in *n*-hexane to afford (+)-**22c** as yellow liquid (46.8 mg, 69% yield over two steps).

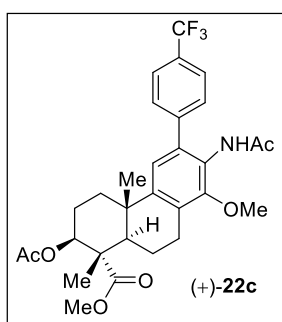

**Methyl** (1*S*,2*S*,4*aS*,10*aR*)-7-acetamido-2-acetoxy-8-methoxy-1,4*a*-dimethyl-6-(4-(trifluoromethyl)phenyl)-1,2,3,4,4*a*,9,10,10*a*-octahydrophenanthrene-1-carboxylate [(+)-**22c**]: (+)-**22c** was obtained as yellow liquid (0.121 mmol scale, 46.8 mg, 69% yield); *R*<sub>f</sub> = 0.3 (50% EtOAc in *n*-hexane).

**<sup>1</sup>H NMR** (400 MHz, CDCl<sub>3</sub>): δ 7.60 (d, *J* = 8.0 Hz, 2H), 7.44 (d, *J* = 8.1 Hz, 2H), 6.97 (s, 1H), 6.86 (s, 1H), 5.19 (dd, *J* = 11.3, 4.5 Hz, 1H), 3.70 (s, 3H), 3.66 (s, 3H), 2.99 (dd, *J* = 18.1, 6.5 Hz, 1H), 2.74 (ddd, *J* = 18.3, 11.2, 7.7 Hz, 1H), 2.30 (d, *J* = 12.3 Hz, 1H), 2.20 (dd, *J* = 12.5, 2.1 Hz, 1H), 1.99 (s, 3H), 1.96 (s, 3H), 1.85 – 1.71 (m, 4H), 1.42 (dd, *J* = 13.7, 7.7 Hz, 1H), 1.29 (s, 3H), 1.24 (s, 3H).

**<sup>19</sup>F NMR** (376 MHz, CDCl<sub>3</sub>): δ -62.28.

**<sup>13</sup>C{<sup>19</sup>F} {<sup>1</sup>H} NMR** (101 MHz, CDCl<sub>3</sub>): δ 176.4, 170.2, 169.6, 153.5, 149.5, 143.7, 137.6, 129.6, 129.3, 128.9, 125.2, 124.9, 124.3, 122.2, 76.7, 60.1, 52.6, 52.1, 45.3, 37.2, 36.4, 25.2, 24.6, 24.0, 23.3, 21.2, 20.5, 11.8.

**IR** (neat)  $\nu_{\max}$ : 3445, 3369, 2913, 2863, 1710, 1569, 1455, 1320, 1243, 915, 540 cm<sup>-1</sup>.

**HRMS** (ESI) *m/z*: [M+ H]<sup>+</sup> calcd. for [C<sub>30</sub>H<sub>34</sub>O<sub>6</sub>NF<sub>3</sub> + H]<sup>+</sup> 562.2416, found 562.2426.

[ $\alpha$ ]<sub>25</sub><sup>589</sup> = +48.5 (*c* = 0.79, CHCl<sub>3</sub>).

#### Synthesis of (+)-**23c** through oxidative C-N bond formation of (+)-**22c**:

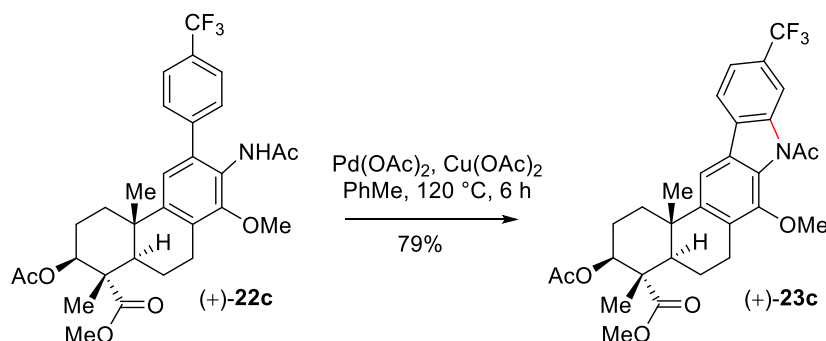

In an oven-dried sealed tube, compound (+)-**22c** (30.0 mg, 0.053 mmol, 1.0 equiv.) was taken in dry toluene (2 mL). The reaction mixture was degassed by purging Argon gas for 10 min after that purged with O<sub>2</sub> gas for 20 min. Next, Pd(OAc)<sub>2</sub> (1.2 mg, 0.0053 mmol, 0.1 equiv.), and Cu(OAc)<sub>2</sub> (2.0 mg, 0.011 mmol, 0.2 equiv.) were added to the solution and the tube was sealed. Then the reaction mixture was allowed to heat to 120 °C on a preheated oil bath for 6 h. After completion of the reaction (monitored by TLC) the crude reaction mixture was diluted with water (2 mL) and EtOAc (3 mL). The resulting biphasic mixture was then transferred to a separatory funnel. The organic phase was collected, and the aqueous phase was further extracted with EtOAc (3 mL X 2). The combined organic layer was concentrated under vacuum

and the crude product was purified by column chromatography (20% Ethyl acetate in *n*-hexane) to afford (+)-**23c** (23.4 mg, 79% yield).

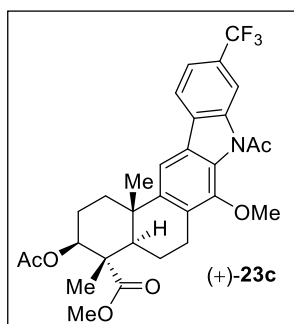

**Methyl (3*S*,4*S*,4*aR*,13*bS*)-8-acetyl-3-hydroxy-7-methoxy-4,13*b*-dimethyl-10-(trifluoromethyl)-2,3,4,4*a*,5,6,8,13*b*-octahydro-1*H*-naphtho[2,1-*b*]carbazole-4-carboxylate [(+)-**23c**]**: (+)-**23c** was obtained as light yellow coloured liquid (0.053 mmol scale of reaction; 23.4.0 mg; 79% yield );  $R_f = 0.30$  (15% EtOAc in *n*-hexane).

**$^1\text{H}$  NMR** (400 MHz,  $\text{CDCl}_3$ ):  $\delta$  8.60 – 8.58 (m, 1H), 7.99 – 7.95 (m, 1H), 7.69 (s, 1H), 7.59 (ddd,  $J = 8.1, 1.6, 0.7$  Hz, 1H), 5.25 (dd,  $J = 11.4, 4.7$  Hz, 1H), 3.69 (s, 3H), 3.69 (s, 3H), 3.18 – 3.11 (m, 1H), 2.87 (ddd,  $J = 18.5, 11.2, 7.9$  Hz, 1H), 2.64 (s, 3H), 2.53 (dd,  $J = 9.7, 3.4$  Hz, 1H), 2.29 – 2.25 (m, 1H), 2.07 – 2.03 (m, 1H), 2.02 (s, 3H), 1.95 – 1.85 (m, 3H), 1.54 – 1.49 (m, 1H), 1.34 (s, 3H), 1.32 (s, 3H).

**$^{19}\text{F}$  NMR** (376 MHz,  $\text{CDCl}_3$ ):  $\delta$  -61.14.

**$^{13}\text{C}\{^{19}\text{F}\}$   $\{^1\text{H}\}$  NMR** (101 MHz,  $\text{CDCl}_3$ ):  $\delta$  176.5, 172.7, 170.2, 147.3, 145.2, 140.0, 129.9, 129.6, 129.3, 128.7, 126.5, 124.6, 120.4, 119.6, 113.1, 112.1, 59.2, 52.6, 52.1, 45.4, 37.5, 37.0, 26.7, 25.6, 24.8, 24.1, 21.2, 20.6, 11.8.

**IR**(neat)  $\nu_{\text{max}}$ : 3422, 2854, 2847, 1745, 1783, 1449, 1278, 958  $\text{cm}^{-1}$ .

**HRMS**(ESI)  $m/z$ :  $[\text{M} + \text{H}]^+$  calcd. for  $[\text{C}_{30}\text{H}_{32}\text{O}_6\text{NF}_3 + \text{H}]^+$  560.2260, found 560.2258.

$[\alpha]_{589}^{25} = +53.0$  ( $c = 0.63$ ,  $\text{CHCl}_3$ ).

**Synthesis of pentacyclic carbazole derivative (+)-**23f**:**

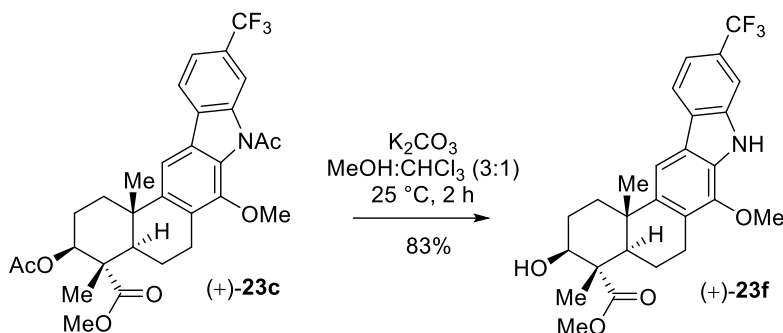

In an oven-dried round bottom flask compound (+)-**23c** (15.0 mg, 0.027 mmol, 1.0 equiv.) was taken in a mixture of methanol and chloroform [MeOH: CHCl<sub>3</sub> (3:1)]. To the solution K<sub>2</sub>CO<sub>3</sub> (8.2 mg, 0.058 mmol, 2.2 equiv.) was added and then the reaction mixture was stirred at 25 °C for 2 h. After completion of the reaction (monitored by TLC) the reaction mixture was directly evaporated under reduced pressure. The mixture was then extracted with EtOAc (5 mL X 3). The combined organic layers were washed with brine and dried over Na<sub>2</sub>SO<sub>4</sub> and concentrated under reduced pressure. Then the crude product was purified by flash chromatography with 30% EtOAc in *n*-hexane to afford (+)-**23f** as yellow liquid.

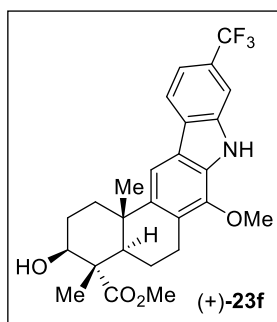

**Methyl (3*S*,4*S*,4*aR*,13*bS*)-3-hydroxy-7-methoxy-4,13*b*-dimethyl-10-(trifluoromethyl)-2,3,4,4*a*,5,6,8,13*b*-octahydro-1*H*-naphtho[2,1-*b*]carbazole-4-carboxylate [(+)-**28**]:** (+)-**28** was obtained as colorless liquid (0.027 mmol scale of reaction; 10.6 mg, 83% yields). *R*<sub>f</sub> = 0.3 (30% EtOAc in *n*-hexane).

**<sup>1</sup>H NMR** (400 MHz, CDCl<sub>3</sub>): δ 8.25 (s, 1H), 8.06 (d, *J* = 8.2 Hz, 1H), 7.76 (s, 1H), 7.68 – 7.66 (m, 1H), 7.46 – 7.41 (m, 1H), 4.08 (dd, *J* = 11.2, 4.6 Hz, 1H), 3.92 (s, 3H), 3.75 (s, 3H), 3.19 (ddd, *J* = 17.9, 6.9, 1.7 Hz, 1H), 2.93 (ddd, *J* = 18.2, 11.1, 7.9 Hz, 1H), 2.59 – 2.52 (m, 1H), 2.19 (dd, *J* = 12.5, 2.3 Hz, 1H), 1.99 – 1.92 (m, 2H), 1.84 (d, *J* = 11.1 Hz, 2H), 1.58 – 1.52 (m, 1H), 1.30 (s, 6H).

**<sup>19</sup>F NMR** (376 MHz, CDCl<sub>3</sub>): δ -60.83.

$^{13}\text{C}\{^{19}\text{F}\}\{^1\text{H}\}$  NMR (101 MHz,  $\text{CDCl}_3$ ):  $\delta$  178.0, 143.4, 142.1, 139.0, 132.1, 127.5, 127.1, 126.8, 125.0, 122.7, 120.4, 116.2, 112.1, 108.2, 75.3, 60.0, 53.8, 52.4, 45.6, 37.7, 37.6, 27.5, 26.0, 24.5, 20.9, 10.8.

IR(neat)  $\nu_{\text{max}}$ : 3515, 2974, 1655, 1460, 1425, 1201, 823, 780, 681  $\text{cm}^{-1}$ .

HRMS(ESI)  $m/z$ :  $[\text{M} + \text{H}]^+$  calcd. for  $[\text{C}_{26}\text{H}_{28}\text{NF}_3\text{O}_4 + \text{H}]^+$  476.2049, found 476.2034.

$[\alpha]_D^{25} = +29.7$  ( $c = 0.43$ ,  $\text{CH}_3\text{OH}$ ).

### Benzylic Oxidation of Compound (+)-23:

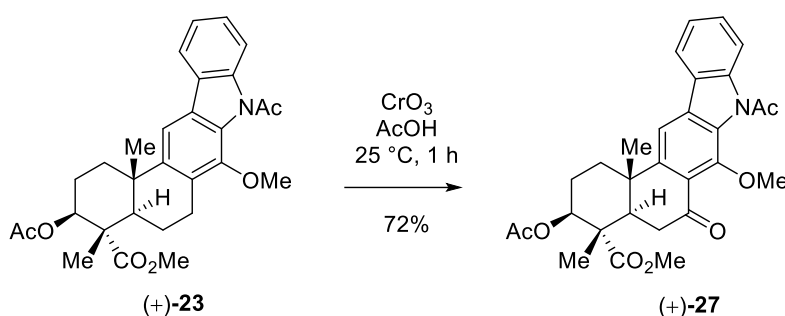

In an oven-dried round bottom flask, the compound (+)-23 (32.0 mg, 0.065 mmol, 1.0 equiv.) was taken in 2 mL of AcOH. To the solution  $\text{CrO}_3$  (13.0 mg, 0.131 mmol, 2 equiv.) was added and the reaction mixture was allowed to stir at 25 °C for 1 h. After completion of reaction (monitored by TLC) the reaction mixture was diluted with ethyl acetate and quenched with saturated aqueous sodium bicarbonate solution. The mixture was extracted with EtOAc (5 mL X 3). The combined organic layers were washed with brine and dried over  $\text{Na}_2\text{SO}_4$  and concentrated under reduced pressure. Then the crude product was purified by flash chromatography with 25% EtOAc in *n*-hexane to afford (+)-27.

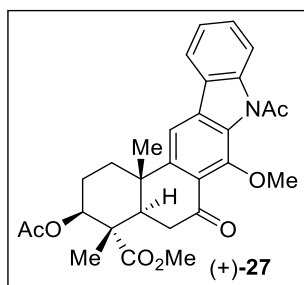

**Methyl (3*S*,4*S*,4*a**R*,13*b**S*)-3-acetoxy-8-acetyl-7-methoxy-4,13*b*-dimethyl-6-oxo-2,3,4,4*a*,5,6,8,13*b*-octahydro-1*H*-naphtho[2,1-*b*]carbazole-4-carboxylate [(+)-27]: (+)-27**

was obtained as yellowish liquid (0.065 mmol scale of reaction; 24.0 mg, 72% yield).  $R_f = 0.3$  (25% EtOAc in *n*-hexane).

$^1\text{H NMR}$  (400 MHz,  $\text{CDCl}_3$ ):  $\delta$  8.27 – 8.25 (m, 1H), 7.98 – 7.95 (m, 1H), 7.70 (s, 1H), 7.55 – 7.51 (m, 1H), 7.38 (dd,  $J = 7.4, 1.0$  Hz, 1H), 5.25 (d,  $J = 7.8$  Hz, 1H), 3.83 (s, 3H), 3.66 (s, 3H), 2.87 – 2.80 (m, 1H), 2.75 – 2.70 (m, 1H), 2.62 (s, 3H), 2.57 – 2.54 (m, 1H), 2.38 (d,  $J = 13.5$  Hz, 1H), 2.13 – 2.08 (m, 2H), 2.03 (s, 3H), 1.92 (d,  $J = 11.9$  Hz, 1H), 1.41 (s, 3H), 1.33 (s, 3H).

$^{13}\text{C NMR}$  (101 MHz,  $\text{CDCl}_3$ ):  $\delta$  196.5, 175.2, 172.9, 170.0, 151.9, 148.9, 141.7, 133.0, 130.5, 129.5, 124.5, 123.7, 123.0, 120.4, 115.4, 110.0, 76.3, 62.0, 52.7, 50.9, 43.6, 38.4, 37.7, 36.5, 27.2, 24.0, 23.7, 21.1, 11.4.

**IR** (neat)  $\nu_{\text{max}}$  3500, 3410, 2924, 1725, 1660, 1460, 1243, 1132, 823, 767, 528  $\text{cm}^{-1}$ .

**HRMS**(ESI)  $m/z$ :  $[\text{M} + \text{Na}]^+$  calcd. for  $[\text{C}_{29}\text{H}_{31}\text{NO}_7 + \text{Na}]^+$  528.1998, found 528.1996.

$[\alpha]_{\text{D}}^{25} = +21.3$  ( $c = 0.24$ ,  $\text{CHCl}_3$ ).

### Synthesis of Compound (+)-28:

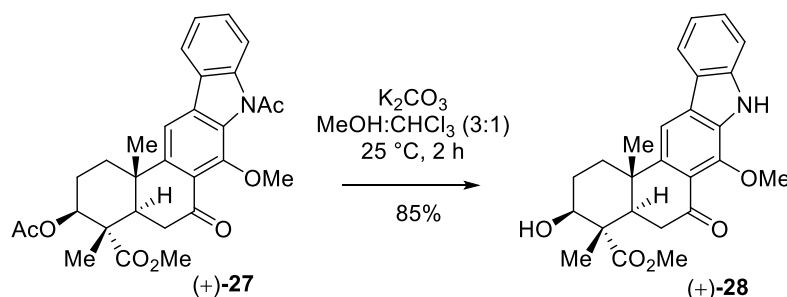

In an oven-dried round bottom flask compound (+)-**27** (24.0 mg, 0.047 mmol, 1.0 equiv.) was taken in a mixture of methanol and chloroform [ $\text{MeOH}:\text{CHCl}_3$  (3:1)]. To the solution  $\text{K}_2\text{CO}_3$  (15.0 mg, 0.104 mmol, 2.2 equiv.) was added and then the reaction mixture was stirred at 25 °C for 2 h. After completion of the reaction (monitored by TLC) the reaction mixture was directly evaporated under reduced pressure. The mixture was then extracted with EtOAc (5 mL X 3). The combined organic layers were washed with brine and dried over  $\text{Na}_2\text{SO}_4$  and concentrated under reduced pressure. Then the crude product was purified by flash chromatography with 50% EtOAc in *n*-hexane to afford (+)-**28** as yellow liquid.

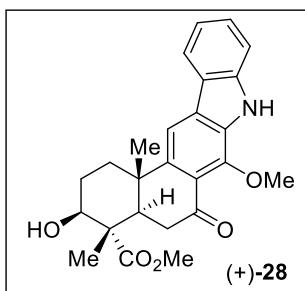

**Methyl (3*S*,4*S*,4*aR*,13*bS*)-3-hydroxy-7-methoxy-4,13*b*-dimethyl-6-oxo-2,3,4,4*a*,5,6,8,13*b*-octahydro-1*H*-naphtho[2,1-*b*]carbazole-4-carboxylate [(+)-**28**]:** (+)-**28** was obtained as colorless liquid (0.047 mmol scale of reaction; 17 mg, 85% yields).  $R_f = 0.25$  (50% EtOAc in *n*-hexane).

**$^1\text{H NMR}$**  (500 MHz,  $\text{CDCl}_3$ ):  $\delta$  8.43 (s, 1H), 8.09 – 8.07 (m, 1H), 7.78 (s, 1H), 7.51 – 7.50 (m, 2H), 7.27 (s, 1H), 4.15 – 4.12 (m, 1H), 4.06 (s, 3H), 3.75 (s, 3H), 2.92 – 2.86 (m, 1H), 2.66 – 2.63 (m, 1H), 2.61 – 2.58 (m, 1H), 2.47 (d,  $J = 13.7$  Hz, 1H), 2.05 – 2.02 (m, 2H), 1.95 (d,  $J = 2.4$  Hz, 1H), 1.39 (s, 3H), 1.33 (s, 3H).

**$^{13}\text{C NMR}$**  (126 MHz,  $\text{CDCl}_3$ ):  $\delta$  197.6, 176.9, 147.3, 146.2, 141.0, 132.0, 128.7, 127.7, 123.2, 121.2, 121.0, 120.0, 111.3, 110.2, 74.8, 62.0, 52.6, 52.5, 43.7, 38.7, 37.8, 37.0, 24.6, 22.7, 10.5.

**IR**(neat)  $\nu_{\text{max}}$  3525, 2944, 1655, 1460, 1445, 1172, 823, 776, 665  $\text{cm}^{-1}$ .

**HRMS**(ESI)  $m/z$ :  $[\text{M} + \text{Na}]^+$  calcd. for  $[\text{C}_{25}\text{H}_{27}\text{NO}_5 + \text{Na}]^+$  444.1787, found 444.1770.

$[\alpha]_{\text{D}}^{25} = +29.7$  ( $c = 0.43$ ,  $\text{CH}_3\text{OH}$ ).

### Total Synthesis of Xiamycin G (+)-**1b**:

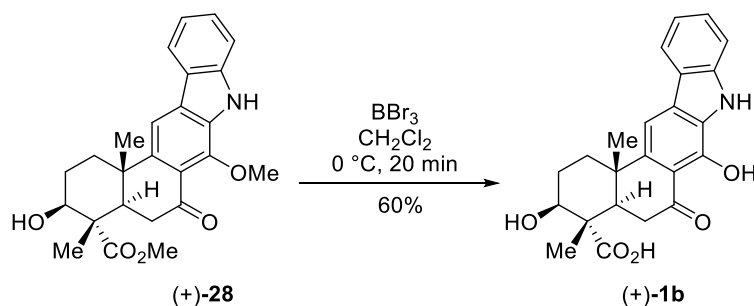

In an oven-dried round bottom flask compound (+)-**28** (17 mg, 0.040 mmol, 1.0 equiv.) was taken in 2 mL dry  $\text{CH}_2\text{Cl}_2$ . To it  $\text{BBr}_3$  (8.4  $\mu\text{L}$ , 0.088 mmol, 2.2 equiv.) was added at 0  $^\circ\text{C}$  and allowed to stir for 20 min. After completion of the reaction (monitored by TLC), the reaction mixture was quenched with water (2 mL). The resulting biphasic mixture was transferred to a

separatory funnel. The organic phase was collected, and the aqueous phase was further extracted with CH<sub>2</sub>Cl<sub>2</sub> (5 mL X 2). The combined organic layers were dried over anhydrous Na<sub>2</sub>SO<sub>4</sub> and concentrated in a rotary evaporator under reduced pressure. The crude product was purified by flash column chromatography with 70% EtOAc in *n*-hexane to afford compound (+)-**1b** as yellow liquid.

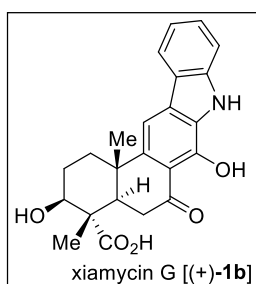

**(3*S*,4*S*,4*a**R*,13*b**S*)-3,7-dihydroxy-4,13*b*-dimethyl-6-oxo-2,3,4,4*a*,5,6,8,13*b*-octahydro-1*H*-naphtho[2,1-*b*]carbazole-4-carboxylic acid [(+)-1b]:** (+)-**1b** was obtained as yellow liquid (0.040 mmol scale of reaction; 10 mg; 60%). *R<sub>f</sub>* = 0.3 (70% EtOAc in *n*-hexane).

**<sup>1</sup>H NMR** (500 MHz, CD<sub>3</sub>OD) δ 8.06 (d, *J* = 7.9 Hz, 1H), 7.55 (s, 1H), 7.49 (d, *J* = 8.2 Hz, 1H), 7.43 (dd, *J* = 8.3, 6.9 Hz, 1H), 7.17 (t, *J* = 7.4 Hz, 1H), 4.12 – 4.08 (m, 1H), 3.02 (dd, *J* = 18.2, 14.1 Hz, 1H), 2.63 (dd, *J* = 8.7, 2.9 Hz, 1H), 2.57 (dd, *J* = 14.1, 3.6 Hz, 1H), 2.32 (dd, *J* = 18.2, 3.5 Hz, 1H), 1.97 – 1.90 (m, 3H), 1.32 (s, 3H), 1.30 (s, 3H).

**<sup>13</sup>C NMR** (126 MHz, CD<sub>3</sub>OD) δ 206.8, 180.4, 152.5, 147.5, 143.5, 130.9, 128.9, 128.4, 124.5, 122.4, 120.8, 113.1, 112.5, 107.1, 76.2, 54.5, 46.9, 39.0, 38.8, 38.4, 28.6, 25.1, 11.5.

**IR**(neat) *ν*<sub>max</sub> 3402, 2937, 2203, 1697, 1633, 1453, 1190, 1013 cm<sup>-1</sup>.

**HRMS**(ESI) *m/z*: [M + H]<sup>+</sup> calcd. for [C<sub>23</sub>H<sub>23</sub>NO<sub>5</sub> + H]<sup>+</sup> 394.1654, found 394.1645.

[α]<sub>D</sub><sup>25</sup> = +25.0 (*c* = 0.1, CHCl<sub>3</sub>).

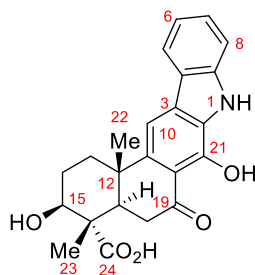

Comparison of  $^1\text{H-NMR}$  Data:

| No. | This report of Xiamycin G<br>(500 MHz, $\text{CD}_3\text{OD}$ ) | Zhang's report of Xiamycin G<br>(600 MHz, $\text{CD}_3\text{OD}$ ) <sup>2</sup> |
|-----|-----------------------------------------------------------------|---------------------------------------------------------------------------------|
| 5   | 8.06 (d, $J = 7.9$ Hz, 1H)                                      | 8.07 (d, $J = 7.8$ Hz, 1H)                                                      |
| 6   | 7.17 (t, $J = 7.4$ Hz, 1H)                                      | 7.18 (dd, $J = 7.8, 7.2$ Hz, 1H)                                                |
| 7   | 7.43 (dd, $J = 8.3, 6.9$ Hz, 1H)                                | 7.44 (dd, $J = 7.8, 7.2$ Hz, 1H)                                                |
| 8   | 7.49 (d, $J = 8.2$ Hz, 1H)                                      | 7.50 (d, $J = 8.4$ Hz, 1H)                                                      |
| 10  | 7.55 (s, 1H)                                                    | 7.55 (s, 1H)                                                                    |
| 13  | 2.63 (dd, $J = 8.7, 2.9$ Hz, 1H)                                | 2.62 (m, 1H)                                                                    |
|     | 1.97-1.90 (m, 1H)                                               | 1.93 (m, 1H)                                                                    |
| 14  | 1.97-1.90 (m, 2H)                                               | 1.93 (m, 2H)                                                                    |
| 15  | 4.12-4.08 (m, 1H)                                               | 4.10 (m, 1H)                                                                    |
| 17  | 2.57 (dd, $J = 14.1, 3.6$ Hz, 1H)                               | 2.58 (m, 1H)                                                                    |
| 18  | 3.02 (dd, $J = 18.2, 14.1$ Hz, 1H)                              | 3.01 (dd, $J = 12, 14.5$ Hz, 1H)                                                |
| 19  | 2.32 (dd, $J = 18.2, 3.5$ Hz, 1H)                               | 2.39 (dd, $J = 12, 14.5$ Hz, 1H)                                                |
| 22  | 1.32 (s, 3H)                                                    | 1.32 (s, 3H)                                                                    |
| 23  | 1.30 (s, 3H)                                                    | 1.30 (s, 3H)                                                                    |

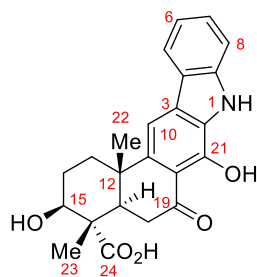Comparison of  $^{13}\text{C-NMR}$  Data:

| No. | This report of Xiamycin G<br>(126 MHz, $\text{CD}_3\text{OD}$ ) | Zhang's report of Xiamycin G<br>(150 MHz, $\text{CD}_3\text{OD}$ ) <sup>2</sup> |
|-----|-----------------------------------------------------------------|---------------------------------------------------------------------------------|
| 2   | 128.4 C                                                         | 128.1 C                                                                         |
| 3   | 130.9 C                                                         | 130.8 C                                                                         |
| 4   | 124.5 C                                                         | 124.2 C                                                                         |
| 5   | 122.4 CH                                                        | 122.2 CH                                                                        |

|    |                      |                      |
|----|----------------------|----------------------|
| 6  | 120.8 CH             | 120.5 CH             |
| 7  | 128.9 CH             | 128.6 CH             |
| 8  | 113.1 CH             | 112.8 CH             |
| 9  | 143.5 C              | 143.3 C              |
| 10 | 107.1 CH             | 106.7 CH             |
| 11 | 147.5 C              | 147.4 C              |
| 12 | 38.8 C               | 38.7 C               |
| 13 | 38.4 CH <sub>2</sub> | 38.2 CH <sub>2</sub> |
| 14 | 28.6 CH <sub>2</sub> | 28.3 CH <sub>2</sub> |
| 15 | 76.2 CH              | 76.2 CH              |
| 16 | 54.5 C               | 54.3 C               |
| 17 | 46.9 CH              | 46.6 CH              |
| 18 | 39.0 CH <sub>2</sub> | 38.6 CH <sub>2</sub> |
| 19 | 206.8 C              | 206.9 C              |
| 20 | 112.5 C              | 112.4 C              |
| 21 | 152.5 C              | 152.2 C              |
| 22 | 25.1 CH <sub>3</sub> | 24.9 CH <sub>3</sub> |
| 23 | 11.5 CH <sub>3</sub> | 11.5 CH <sub>3</sub> |
| 24 | 180.4 C              | 181.3 C              |

### References:

1. Nandi, R.; Niyogi, S.; Kundu, S.; Gavit, V. R.; Mumda, M.; Murmu, M.; Bisai, A. *Chem. Sci.* **2023**, *14*, 8047.
2. Zhang, Q.; Li, H.; Yu, L.; Sun, Y.; Zhu, Y.; Zhu, H.; Zhang, L.; Li, S.; Shen, Y.; Tian, C.; Li, A.; Liu, H.; Zhang C. *Chem. Sci.* **2017**, *8*, 5067.

## Spectral Traces

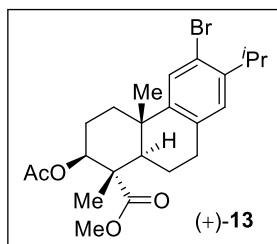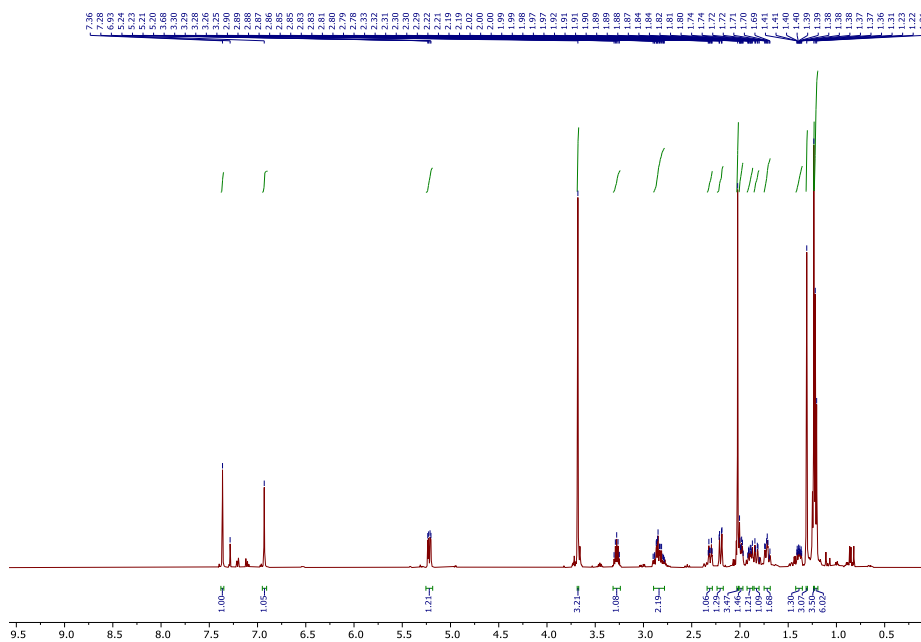 $^1\text{H}$  NMR (500 MHz,  $\text{CDCl}_3$ ) of (+)-13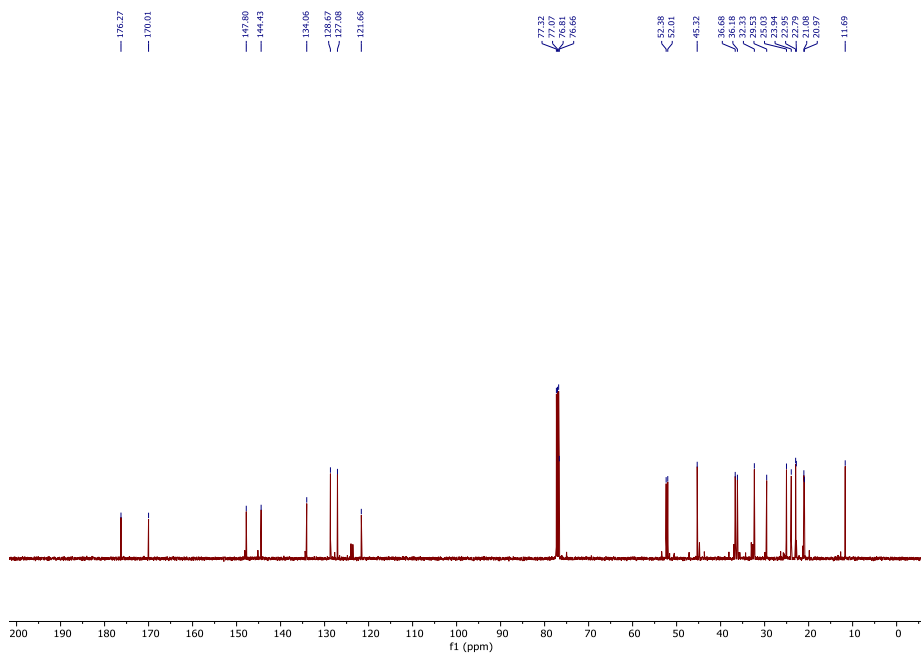 $^{13}\text{C}$  NMR (125 MHz,  $\text{CDCl}_3$ ) of (+)-13

## Display Report

## Analysis Info

Analysis Name D:\Data\User data\2022\FEB\AB\_RN\_0364rep.d  
 Method Tune\_pos\_Standard.m  
 Sample Name AB\_RN\_0364  
 Comment

Acquisition Date 2/18/2022 12:08:53 PM

Operator IISER Kolkata  
 Instrument maXis impact 8282001.00127

## Acquisition Parameter

|             |          |                      |          |                  |           |
|-------------|----------|----------------------|----------|------------------|-----------|
| Source Type | ESI      | Ion Polarity         | Positive | Set Nebulizer    | 0.5 Bar   |
| Focus       | Active   | Set Capillary        | 3400 V   | Set Dry Heater   | 200 °C    |
| Scan Begin  | 50 m/z   | Set End Plate Offset | -500 V   | Set Dry Gas      | 4.0 l/min |
| Scan End    | 1000 m/z | Set Charging Voltage | 2000 V   | Set Divert Valve | Source    |
|             |          | Set Corona           | 0 nA     | Set APCI Heater  | 0 °C      |

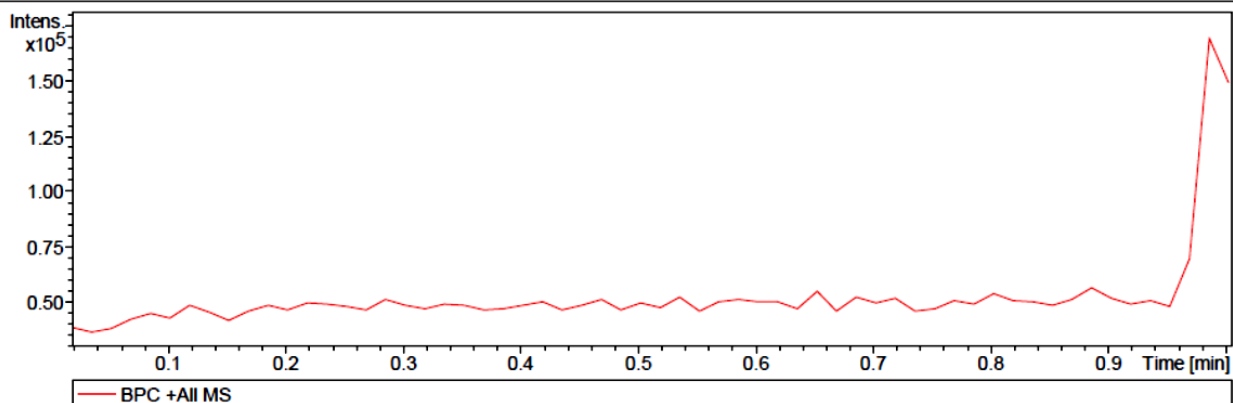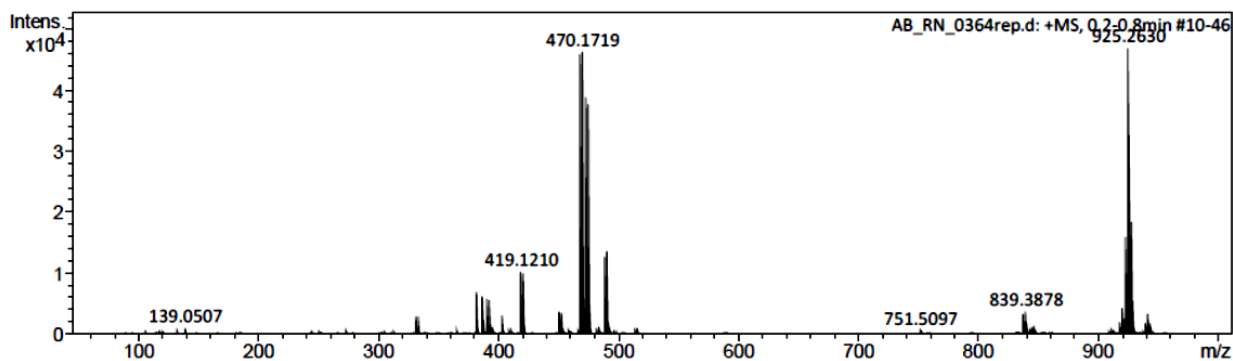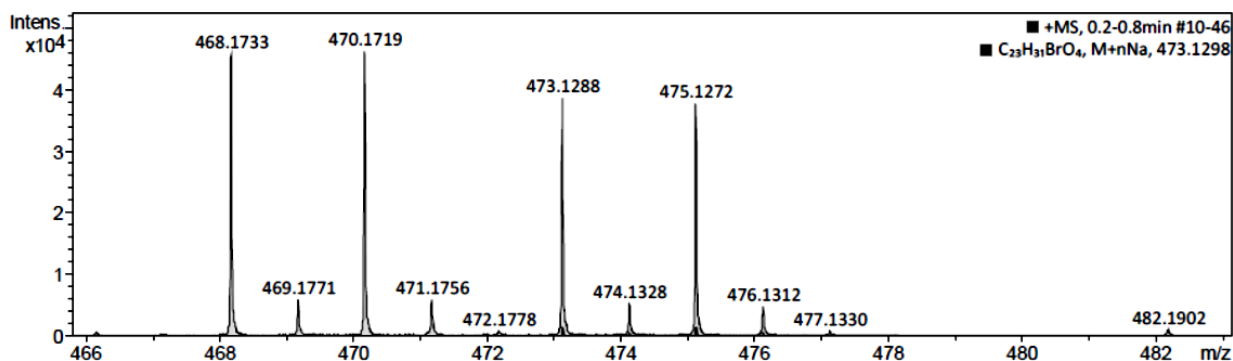

AB\_RN\_0364rep.d

Bruker Compass DataAnalysis 4.1

printed: 2/18/2022 12:11:22 PM

by: IISER Kolkata

Page 1 of 1

HRMS data of (+)-13



## Display Report

## Analysis Info

Analysis Name D:\Data\User data\2022\FEB\ab\_m\_0366.d  
Method Tune\_pos\_Standard.m  
Sample Name ab\_m\_0366  
Comment

Acquisition Date 2/14/2022 11:27:56 AM

Operator IISER Kolkata  
Instrument maXis impact 8282001.00127

## Acquisition Parameter

|             |          |                      |          |                  |           |
|-------------|----------|----------------------|----------|------------------|-----------|
| Source Type | ESI      | Ion Polarity         | Positive | Set Nebulizer    | 0.5 Bar   |
| Focus       | Active   | Set Capillary        | 3400 V   | Set Dry Heater   | 200 °C    |
| Scan Begin  | 50 m/z   | Set End Plate Offset | -500 V   | Set Dry Gas      | 4.0 l/min |
| Scan End    | 1000 m/z | Set Charging Voltage | 2000 V   | Set Divert Valve | Source    |
|             |          | Set Corona           | 0 nA     | Set APCI Heater  | 0 °C      |

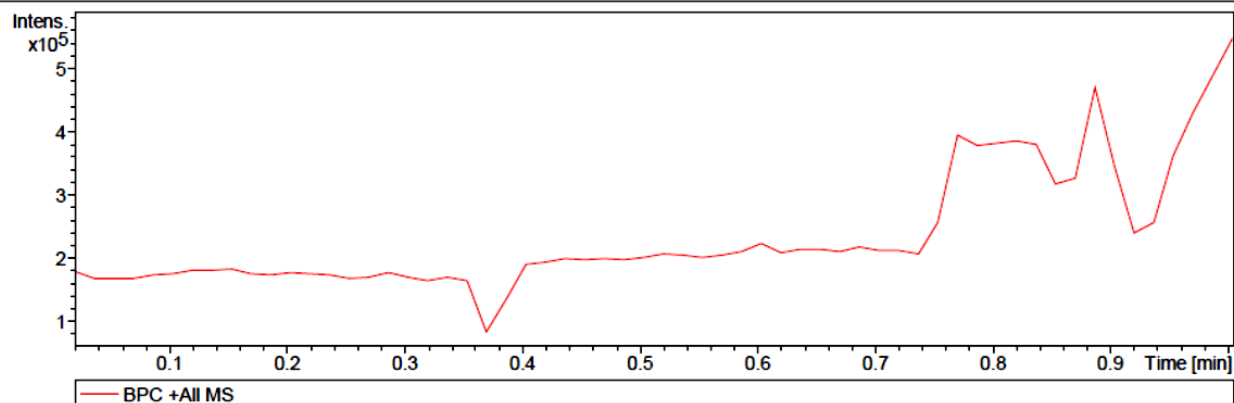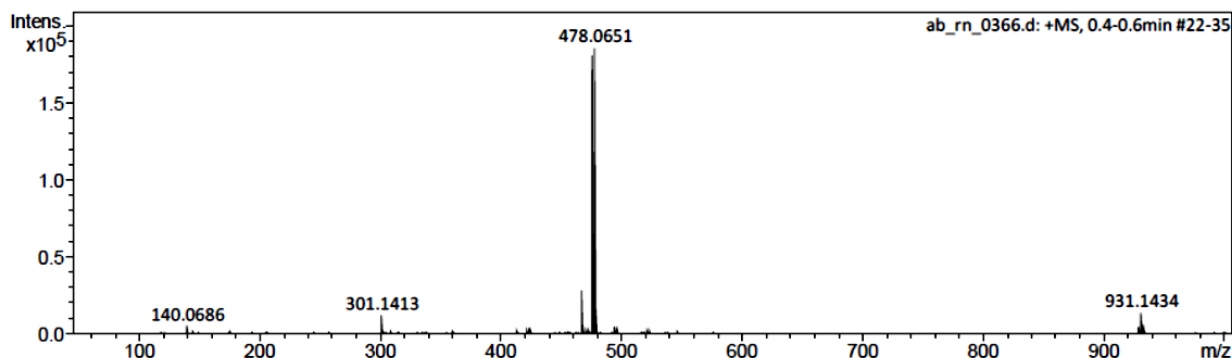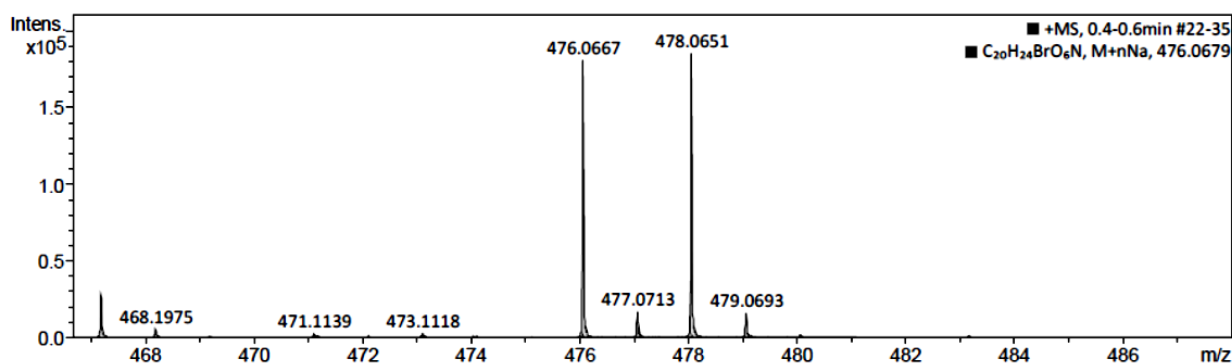

ab\_m\_0366.d

Bruker Compass DataAnalysis 4.1

printed: 2/14/2022 11:30:53 AM

by: IISER Kolkata

Page 1 of 1

HRMS data of (+)-12

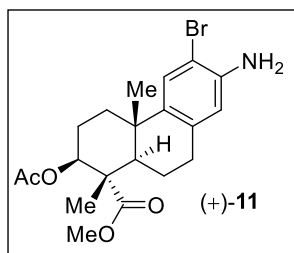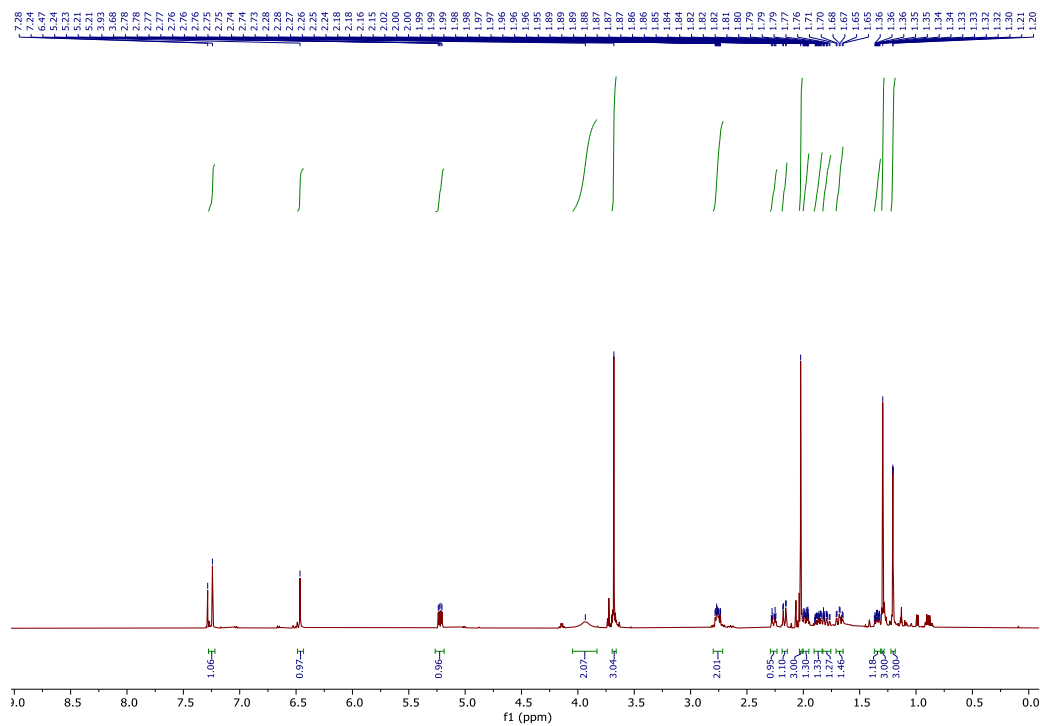

<sup>1</sup>H NMR (500 MHz, CDCl<sub>3</sub>) of (+)-11

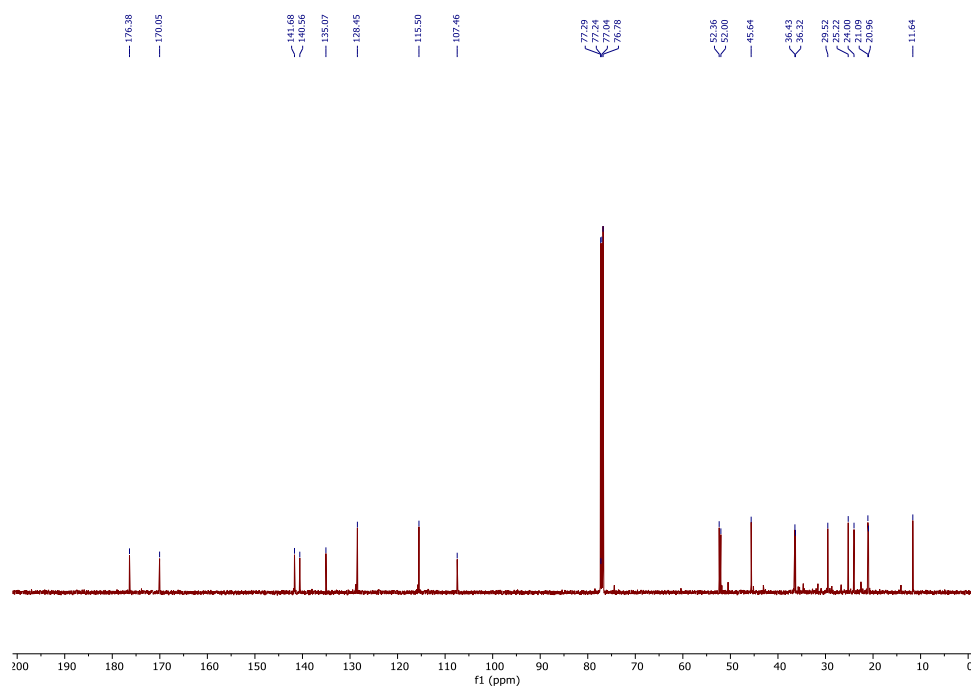

<sup>13</sup>C NMR (125 MHz, CDCl<sub>3</sub>) of (+)-11

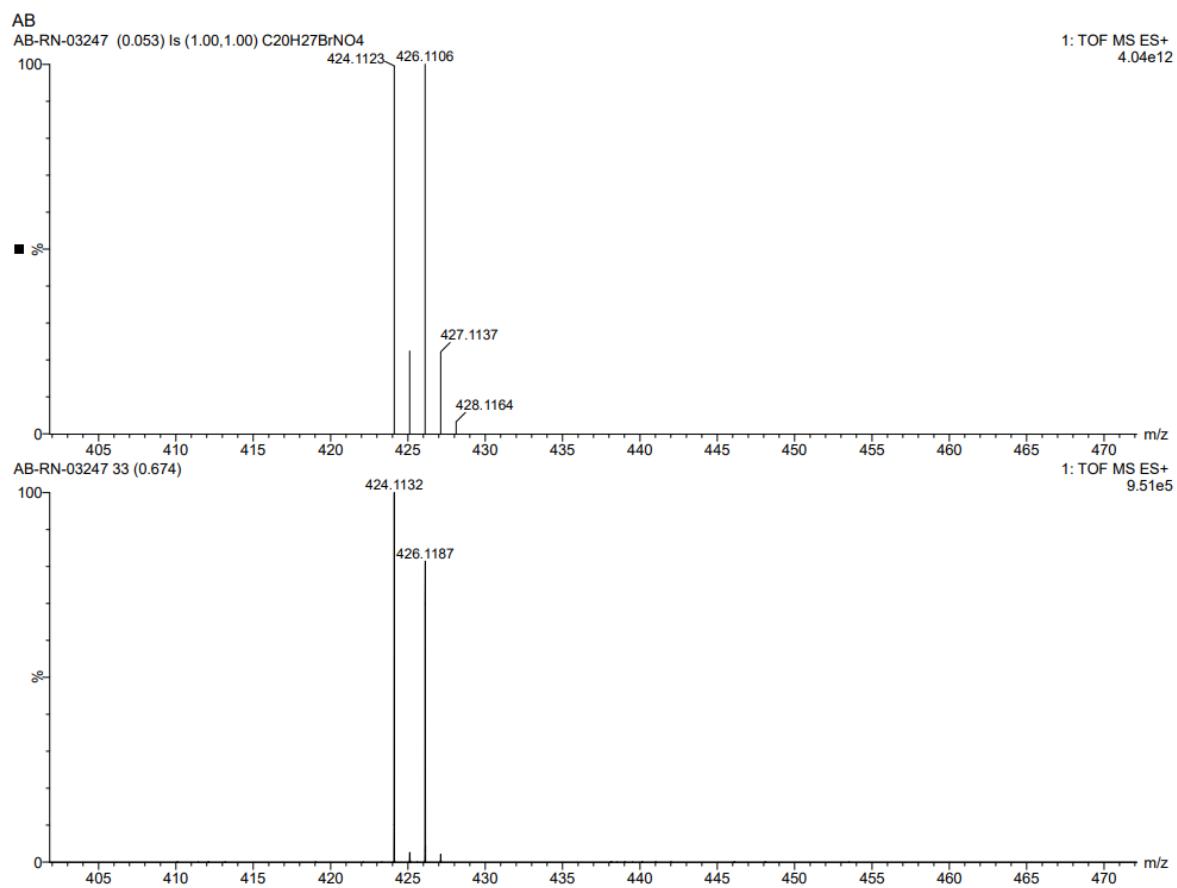

HRMS data of (+)-11

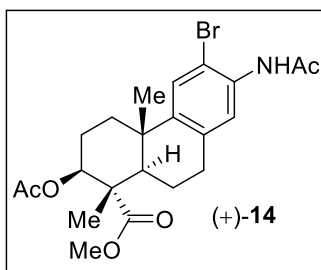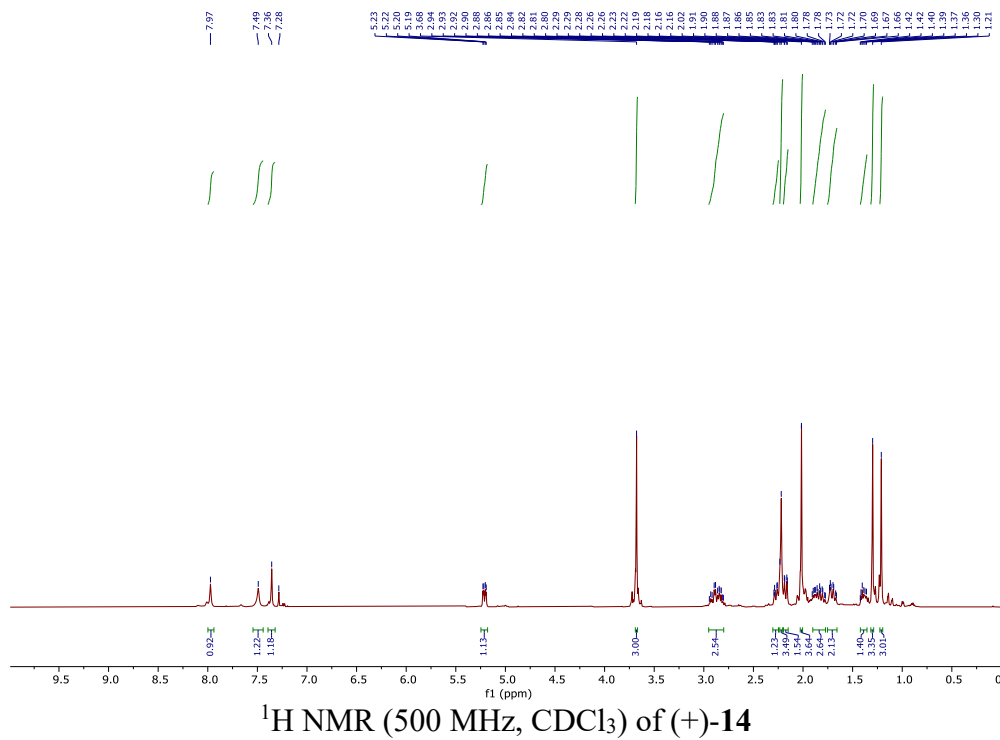

$^1\text{H NMR}$  (500 MHz,  $\text{CDCl}_3$ ) of (+)-14

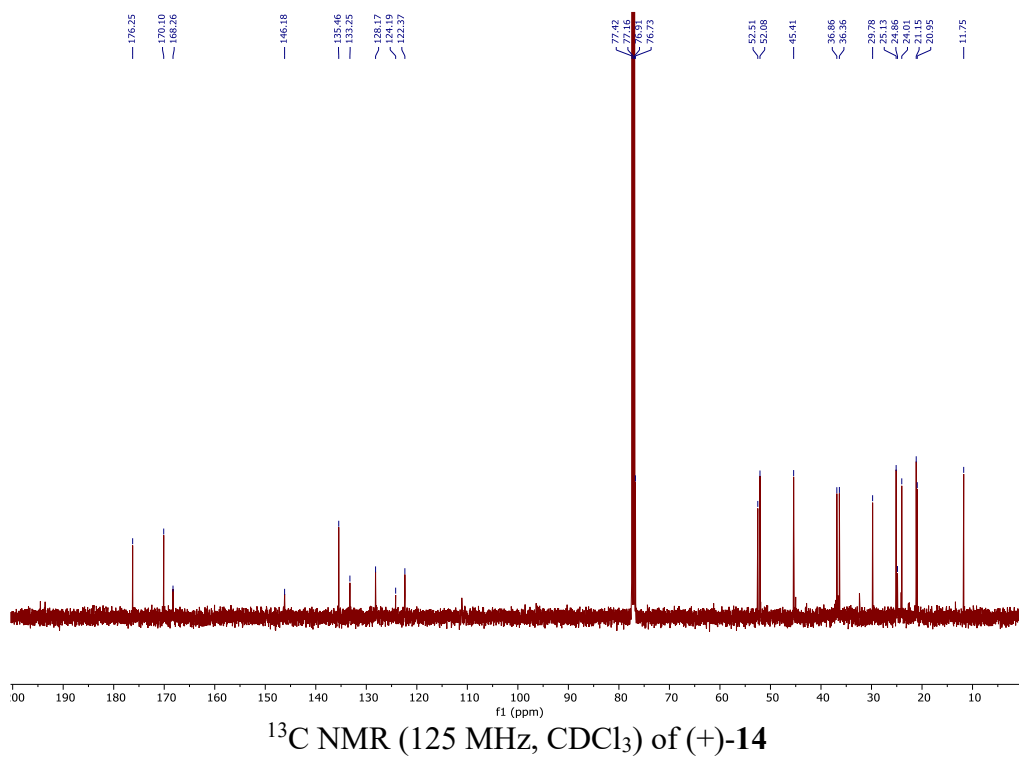

$^{13}\text{C NMR}$  (125 MHz,  $\text{CDCl}_3$ ) of (+)-14

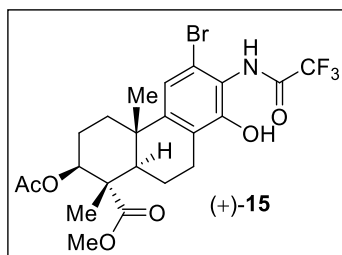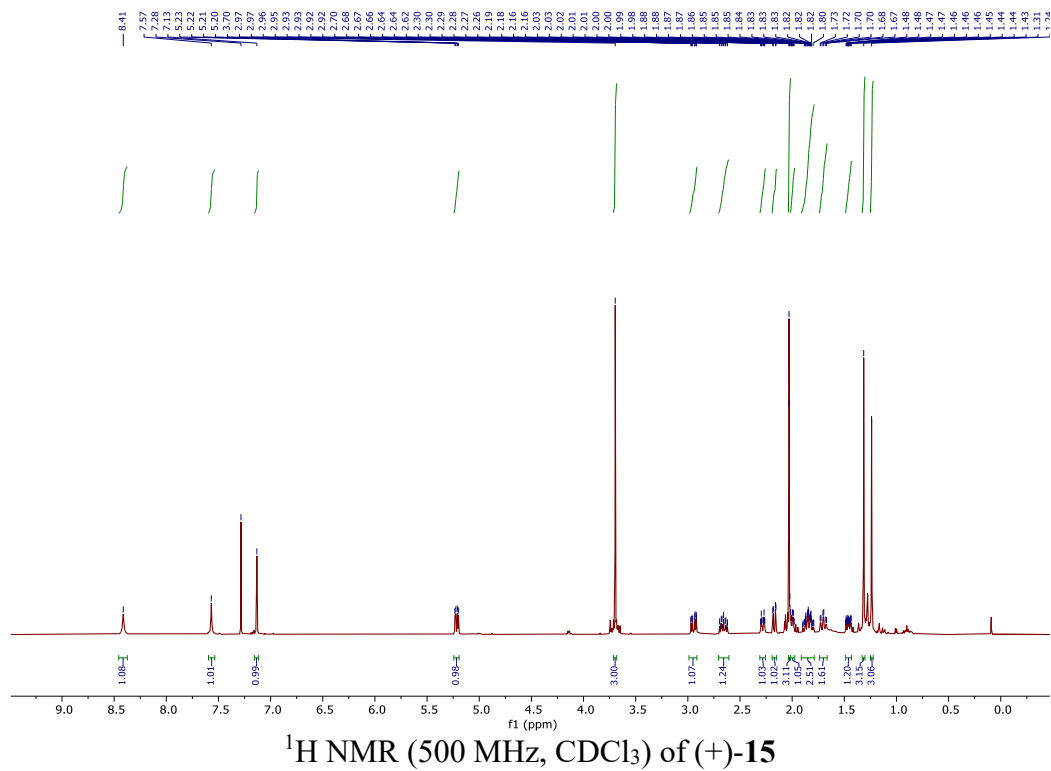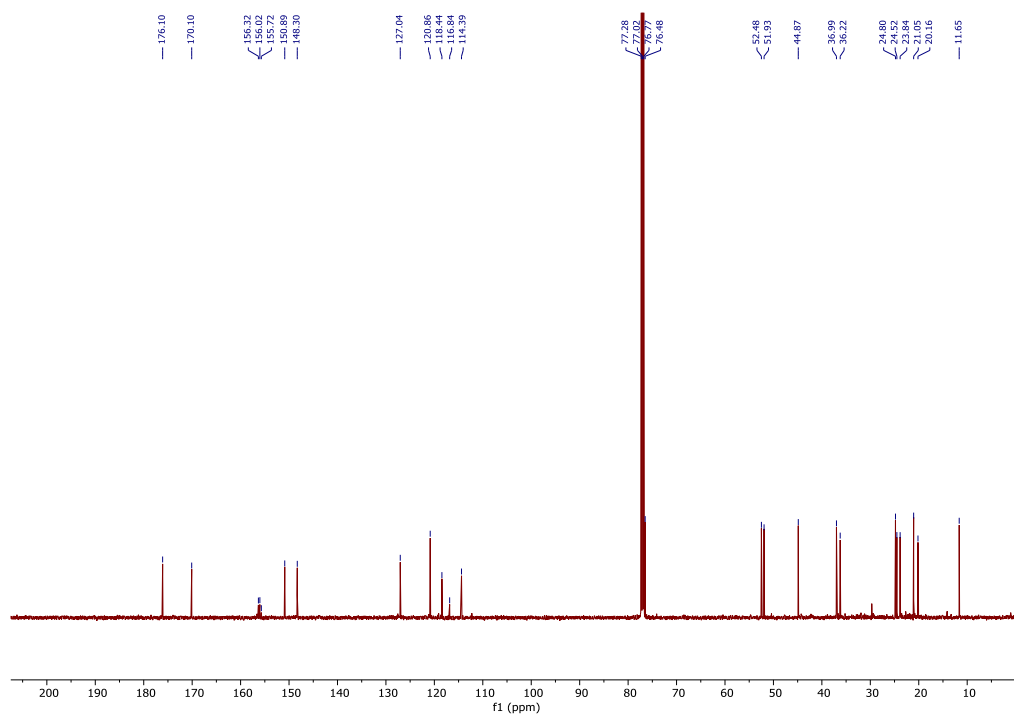

NMR FILE:430.fid  
 GROUP AB  
 AB-AYA-RN03279 19F in CDCl3  
 F19 decoupled

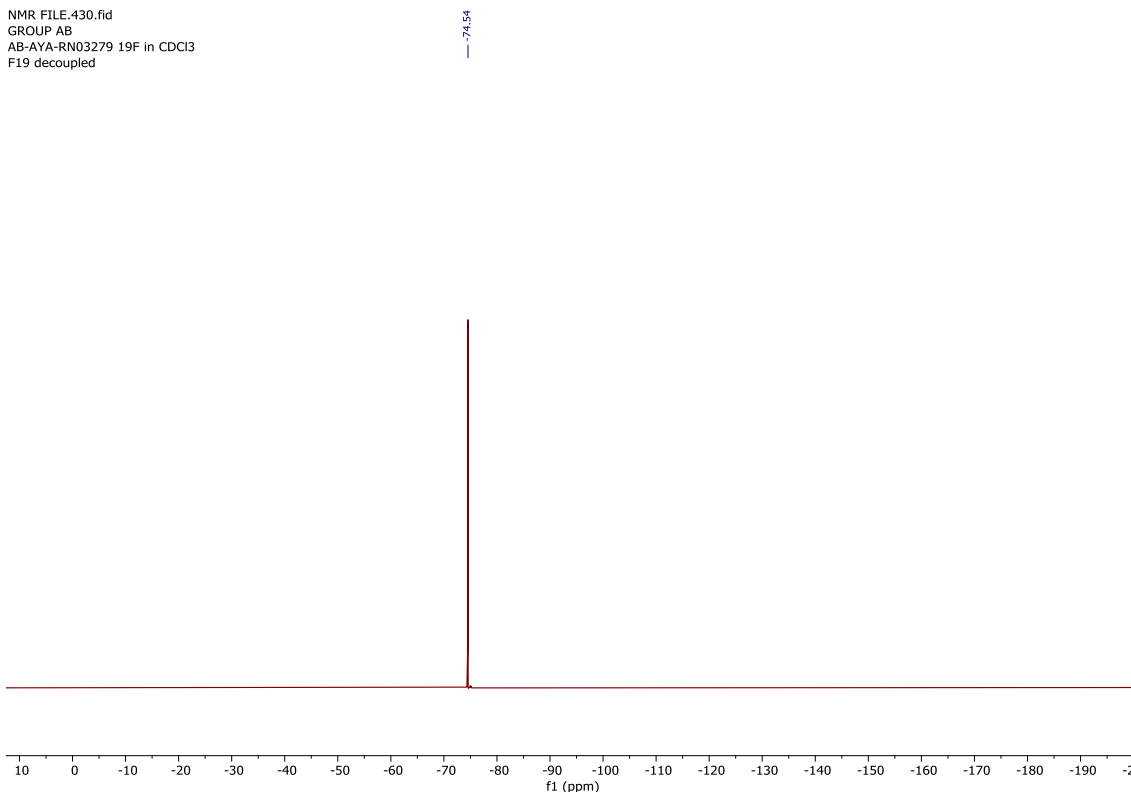

<sup>19</sup>F NMR (470 MHz, CDCl<sub>3</sub>) of (+)-15

### Display Report

|                      |                                           |                  |                       |               |
|----------------------|-------------------------------------------|------------------|-----------------------|---------------|
| <b>Analysis Info</b> |                                           | Acquisition Date | 1/13/2023 11:05:28 AM |               |
| Analysis Name        | D:\Data\User data\2023\JAN\lab_rn_03279.d | Operator         | IISER Kolkata         |               |
| Method               | Tune_pos_Standard_July2022.new.m          | Instrument       | maXis impact          | 8282001.00127 |
| Sample Name          | ab_rn_03279                               | Comment          |                       |               |

|                              |          |                      |          |                  |           |
|------------------------------|----------|----------------------|----------|------------------|-----------|
| <b>Acquisition Parameter</b> |          |                      |          |                  |           |
| Source Type                  | ESI      | Ion Polarity         | Positive | Set Nebulizer    | 0.4 Bar   |
| Focus                        | Active   | Set Capillary        | 4500 V   | Set Dry Heater   | 200 °C    |
| Scan Begin                   | 50 m/z   | Set End Plate Offset | -500 V   | Set Dry Gas      | 4.0 l/min |
| Scan End                     | 1000 m/z | Set Charging Voltage | 2000 V   | Set Divert Valve | Source    |
|                              |          | Set Corona           | 0 nA     | Set APCI Heater  | 0 °C      |

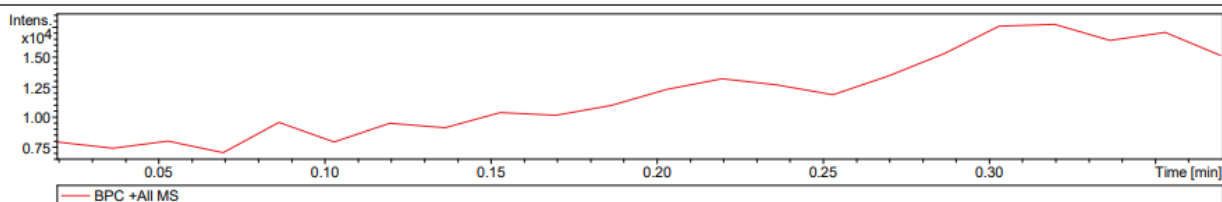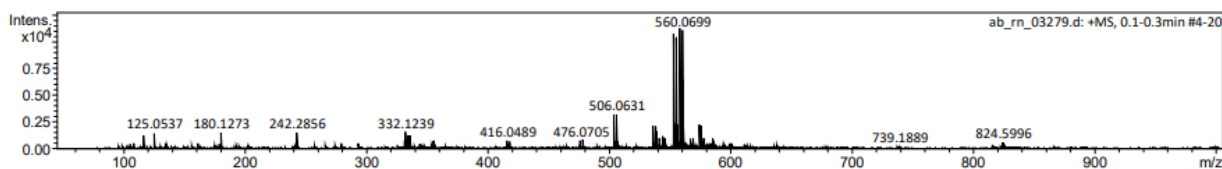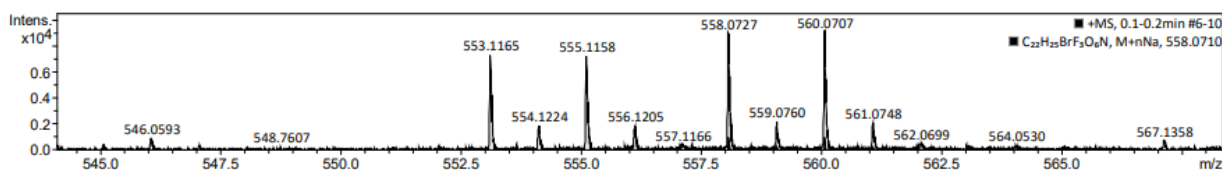

ab rn 03279.d

HRMS data of (+)-15

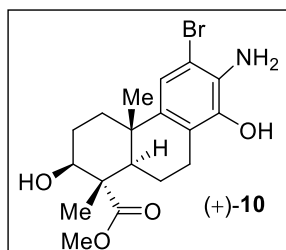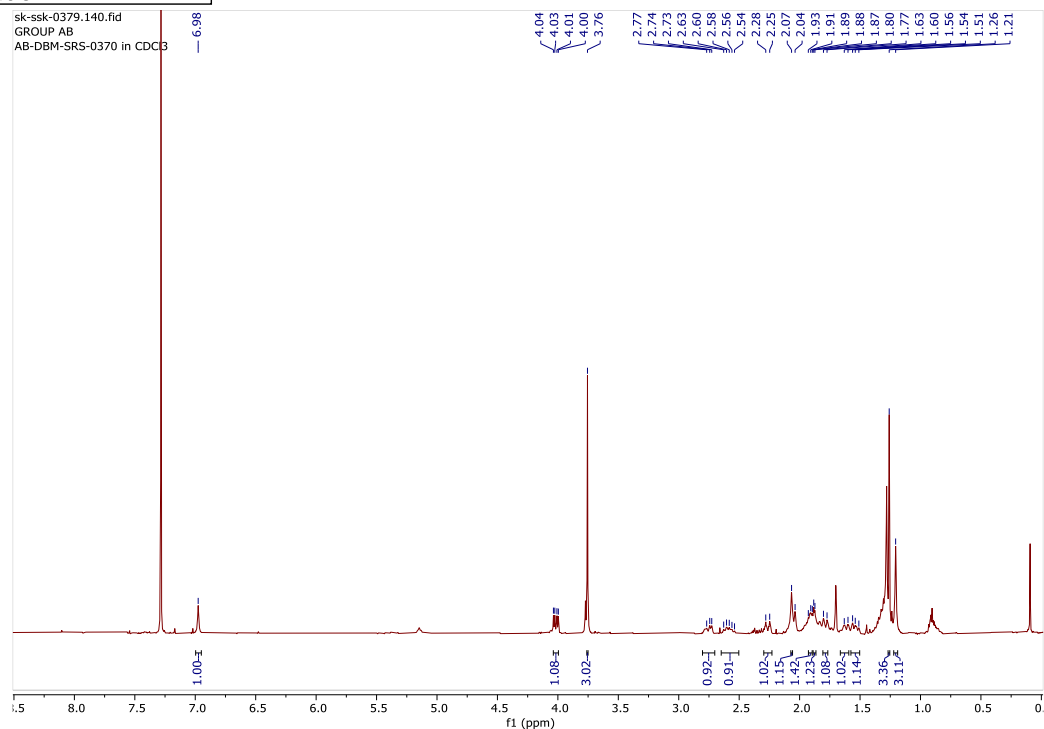<sup>1</sup>H NMR (400 MHz, CDCl<sub>3</sub>) of [(+)-10]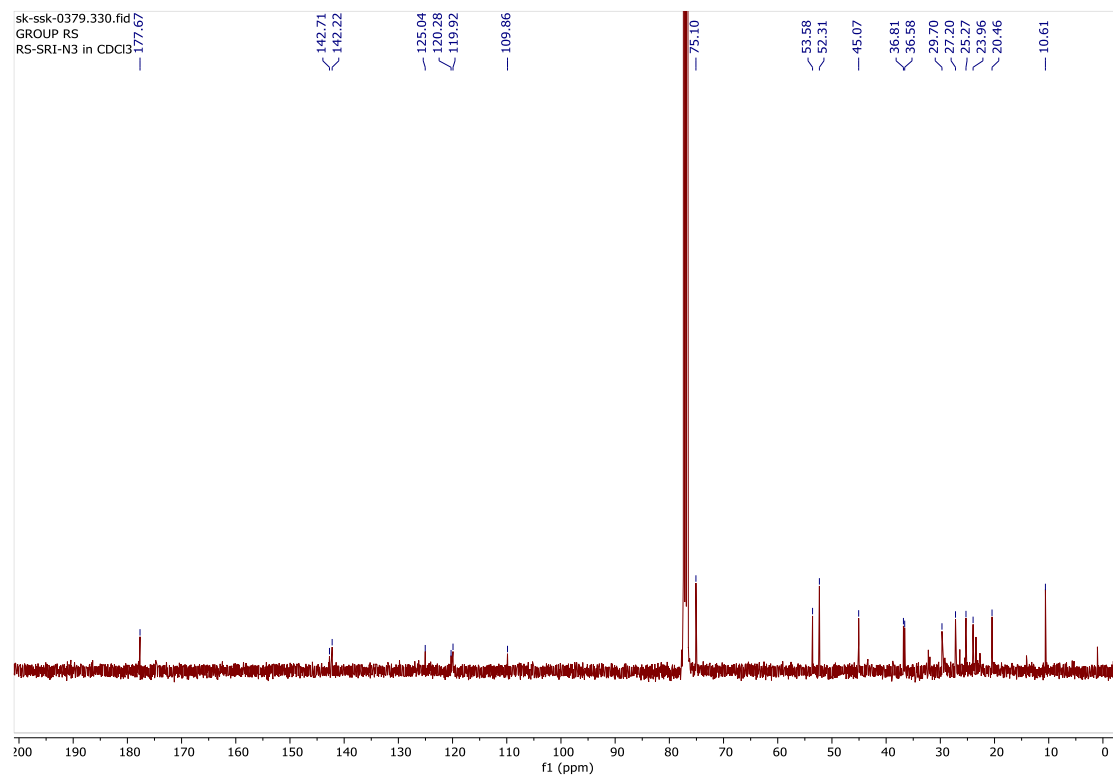<sup>13</sup>C NMR (126 MHz, CDCl<sub>3</sub>) of [(+)-10]

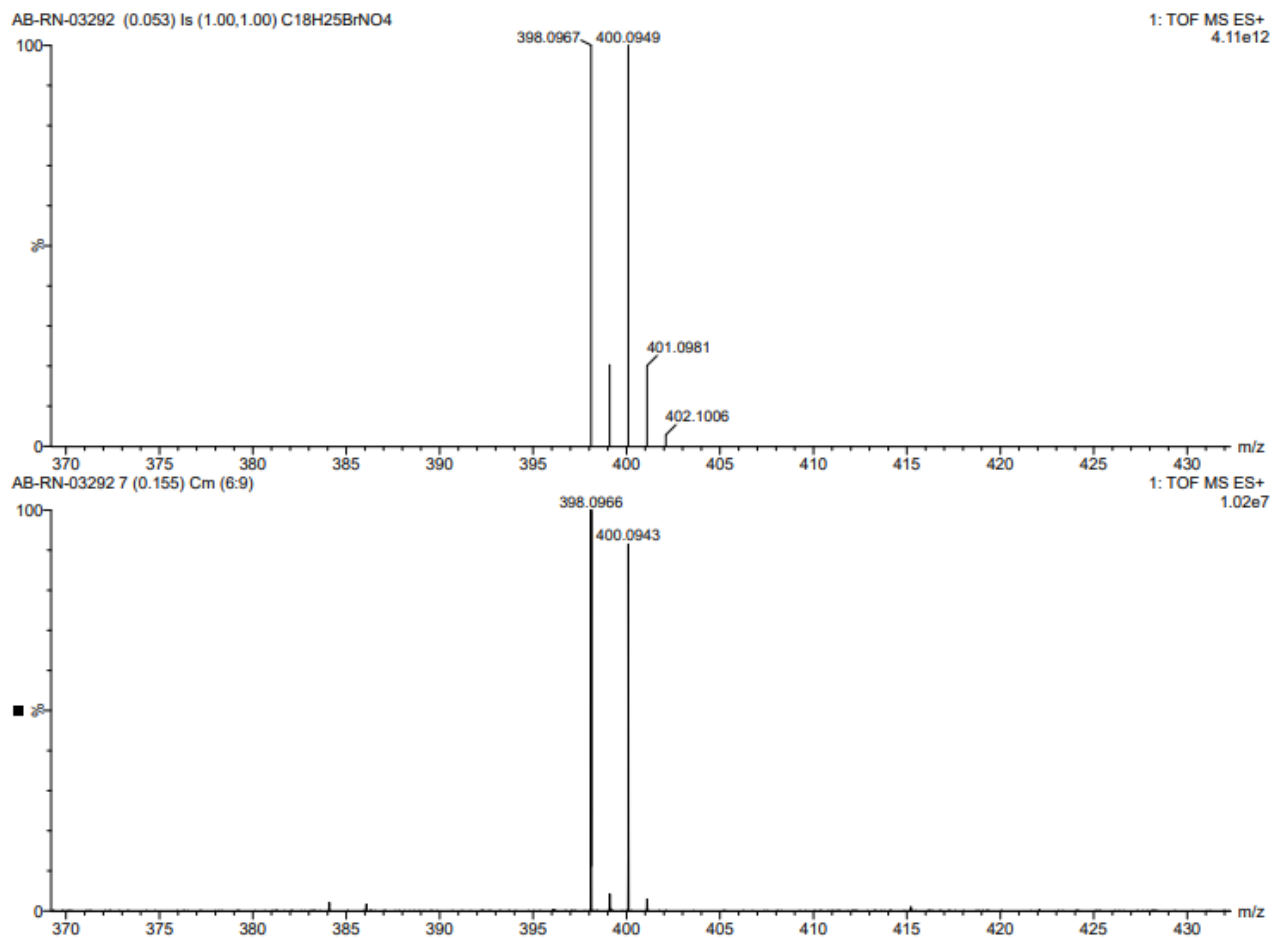

HRMS data of (+)-10

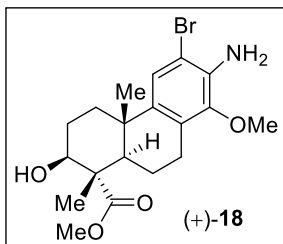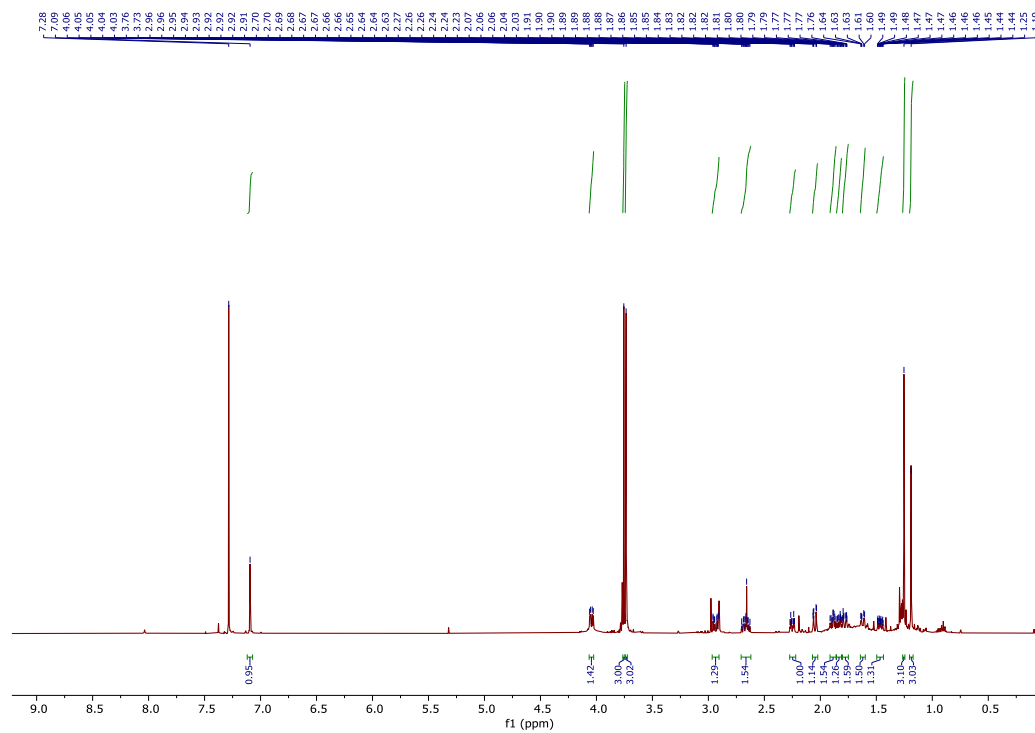

<sup>1</sup>H NMR (500 MHz, CDCl<sub>3</sub>) of (+)-18

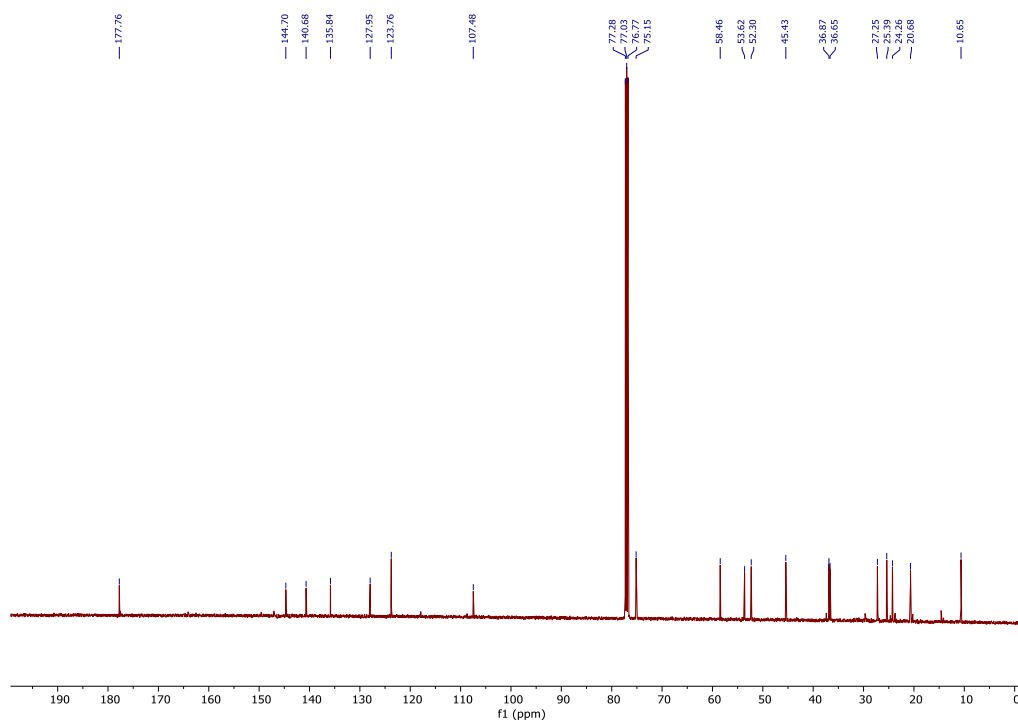

<sup>13</sup>C NMR (125 MHz, CDCl<sub>3</sub>) of (+)-18

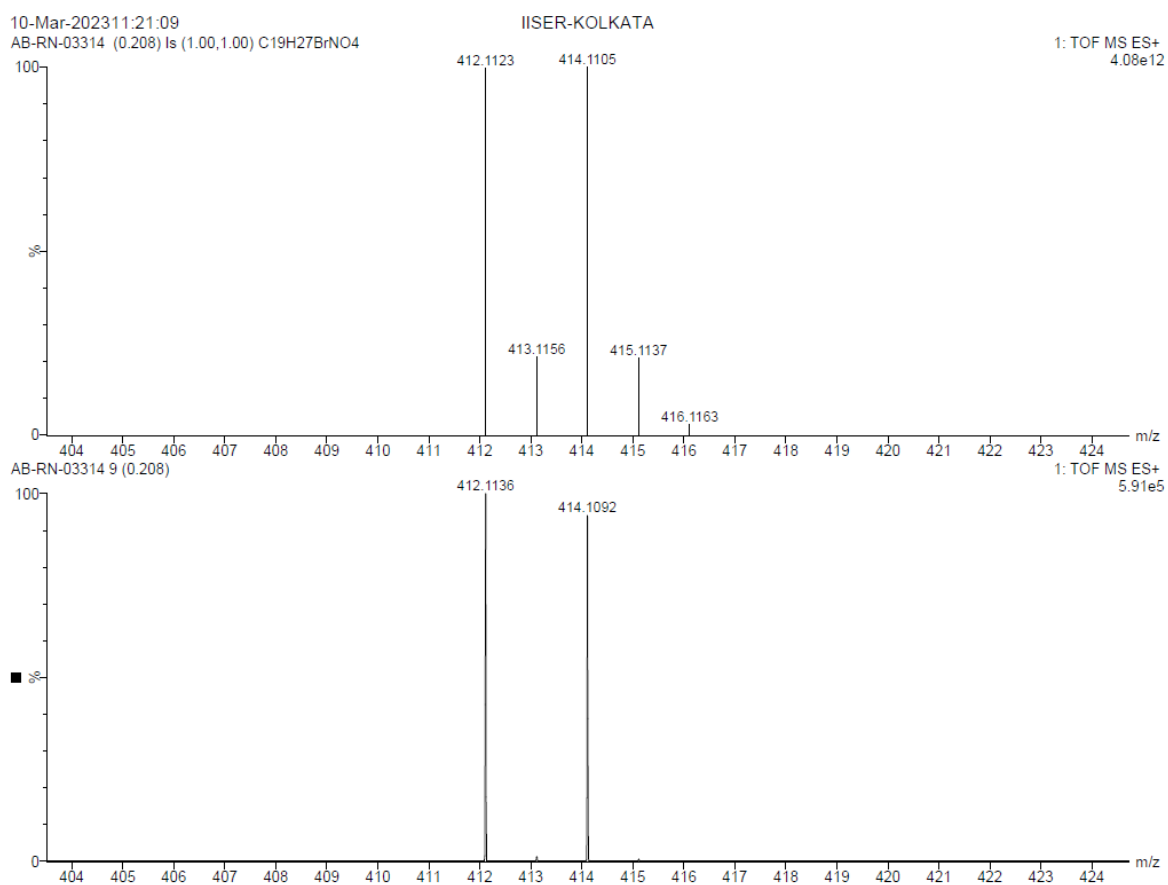HRMS data of (+)-**18**

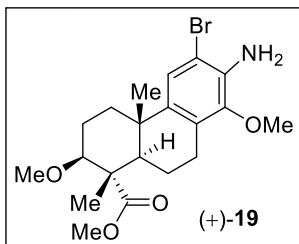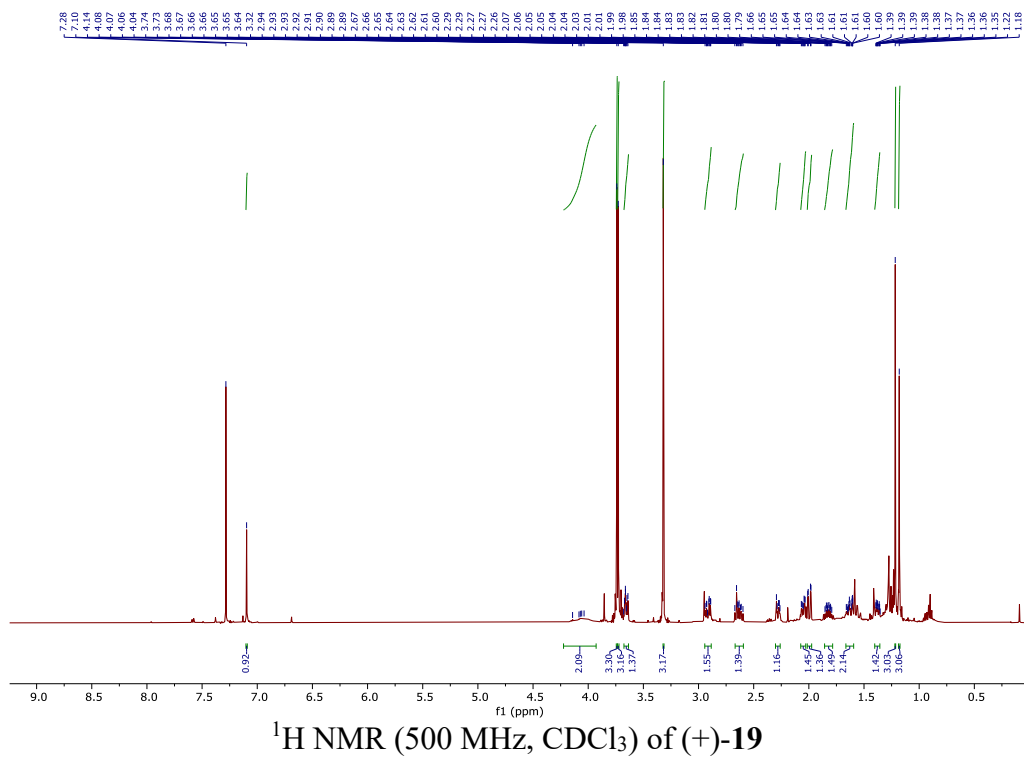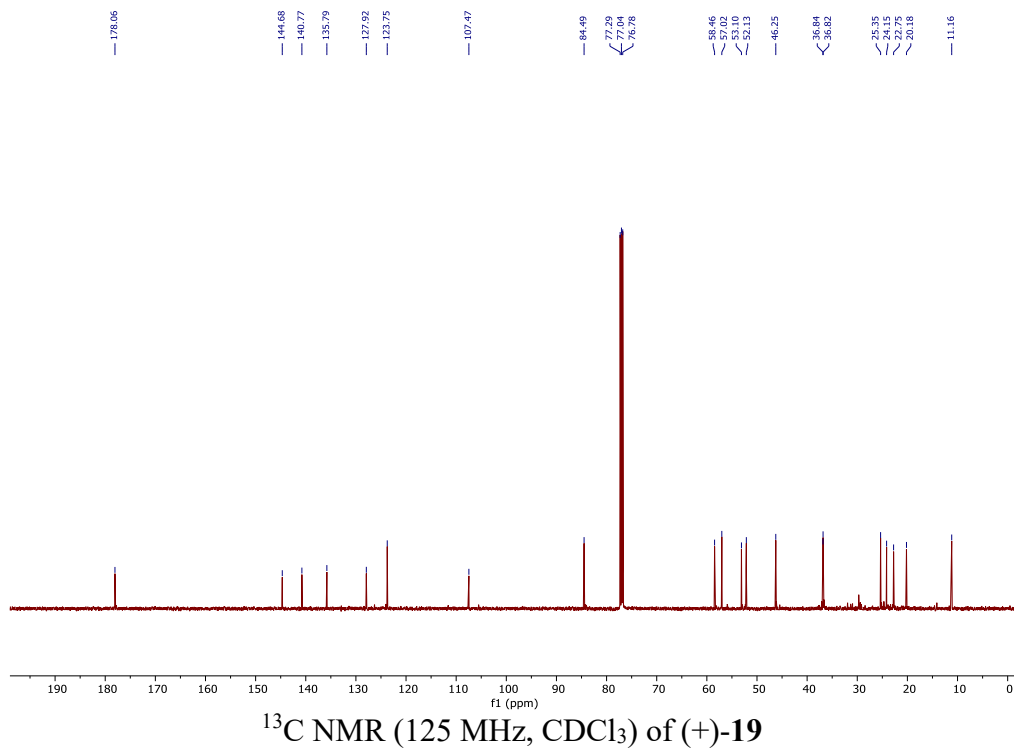

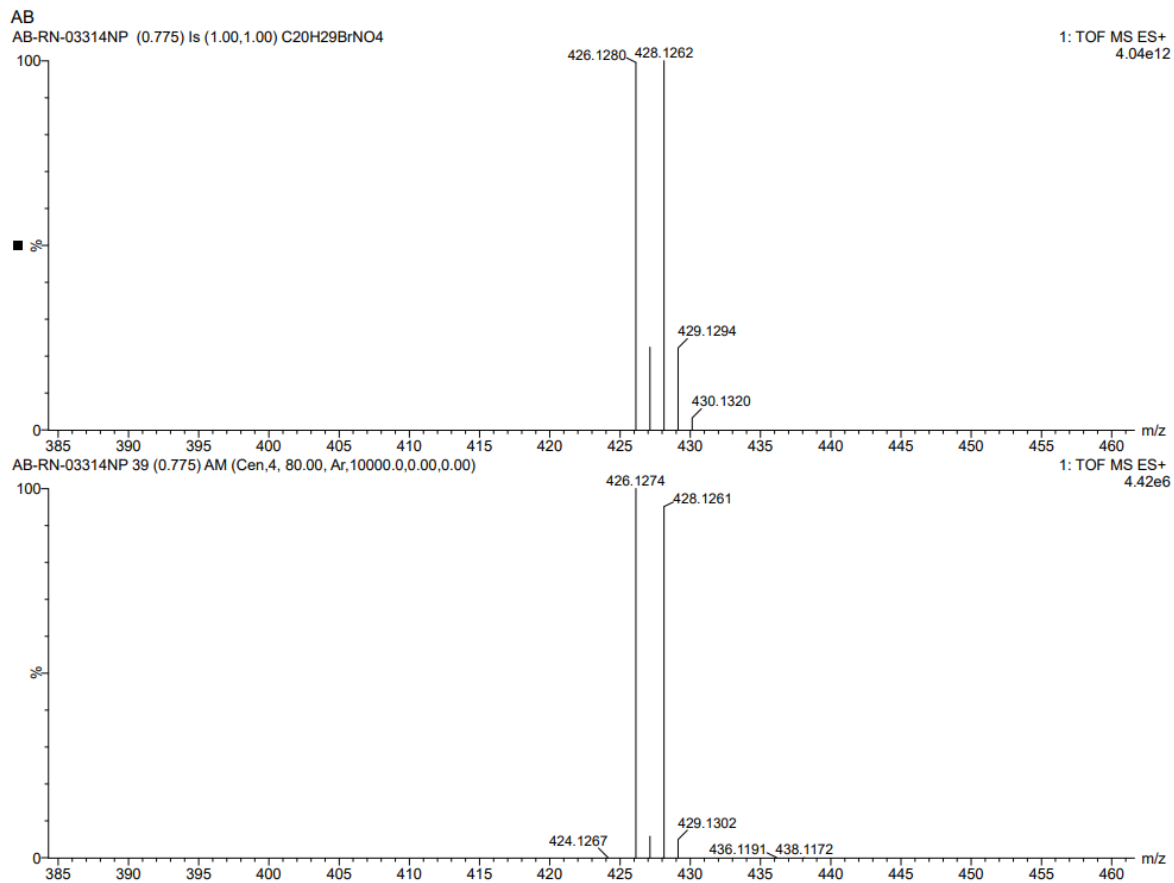

HRMS data of (+)-19

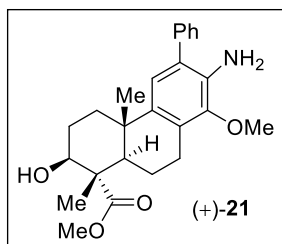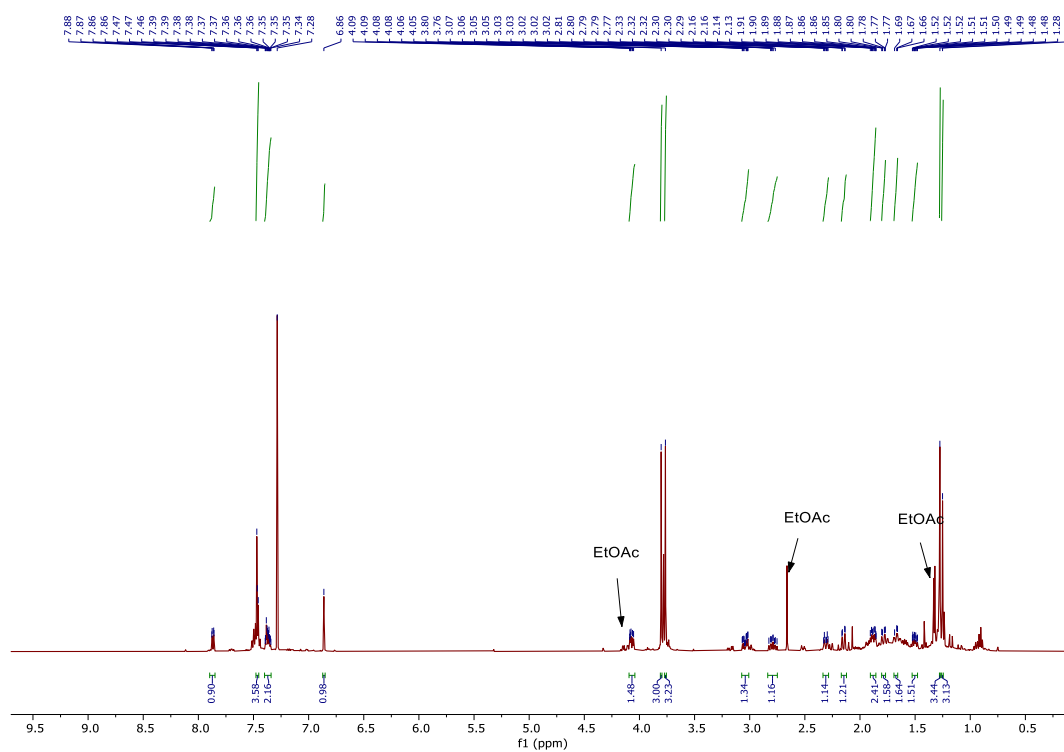

<sup>1</sup>H NMR (500 MHz, CDCl<sub>3</sub>) of (+)-21

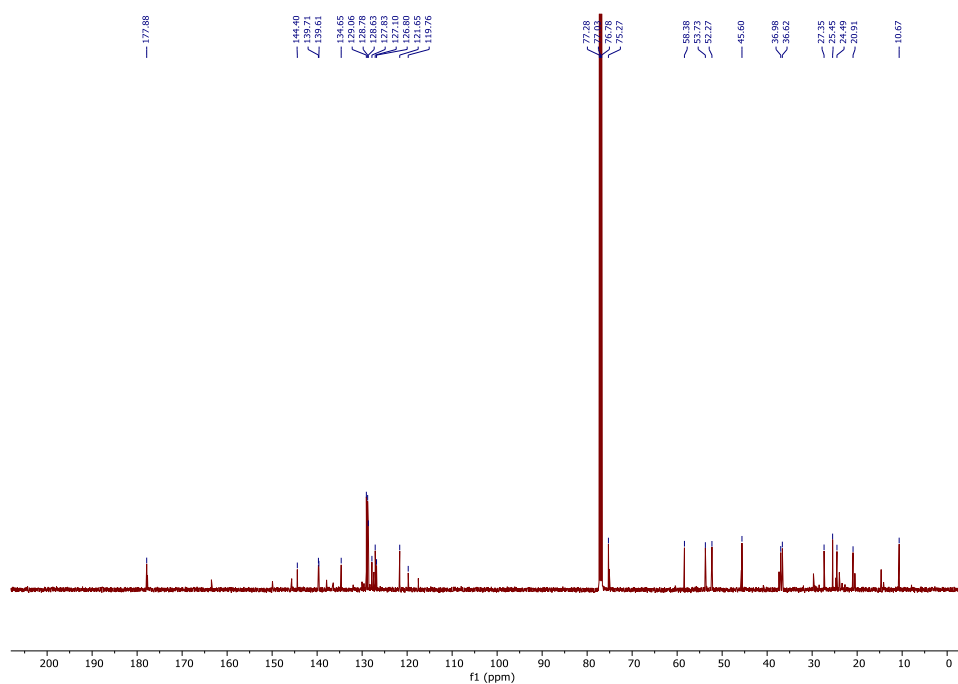

<sup>13</sup>C NMR (125 MHz, CDCl<sub>3</sub>) of (+)-21

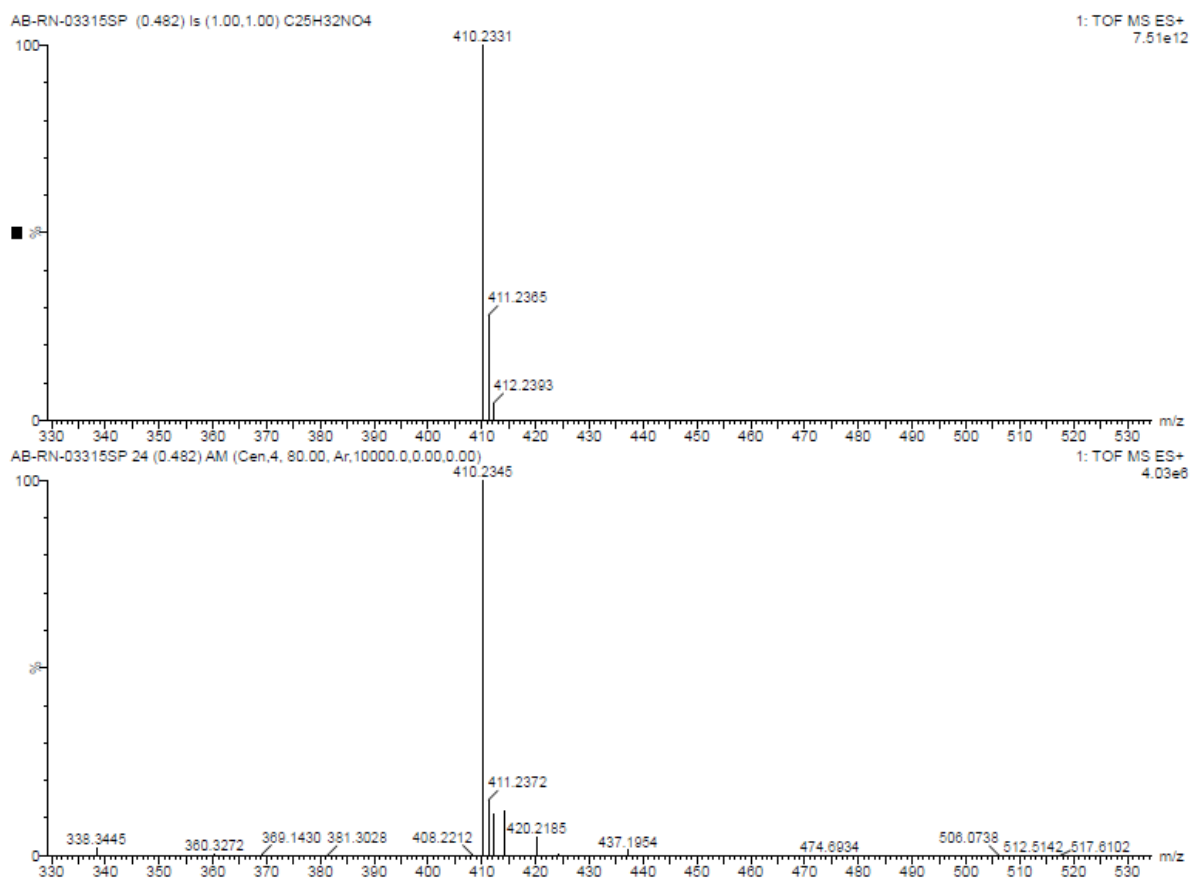

HRMS data of (+)-21

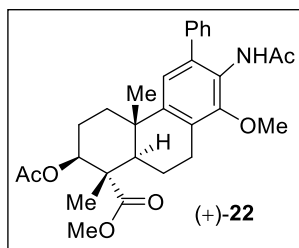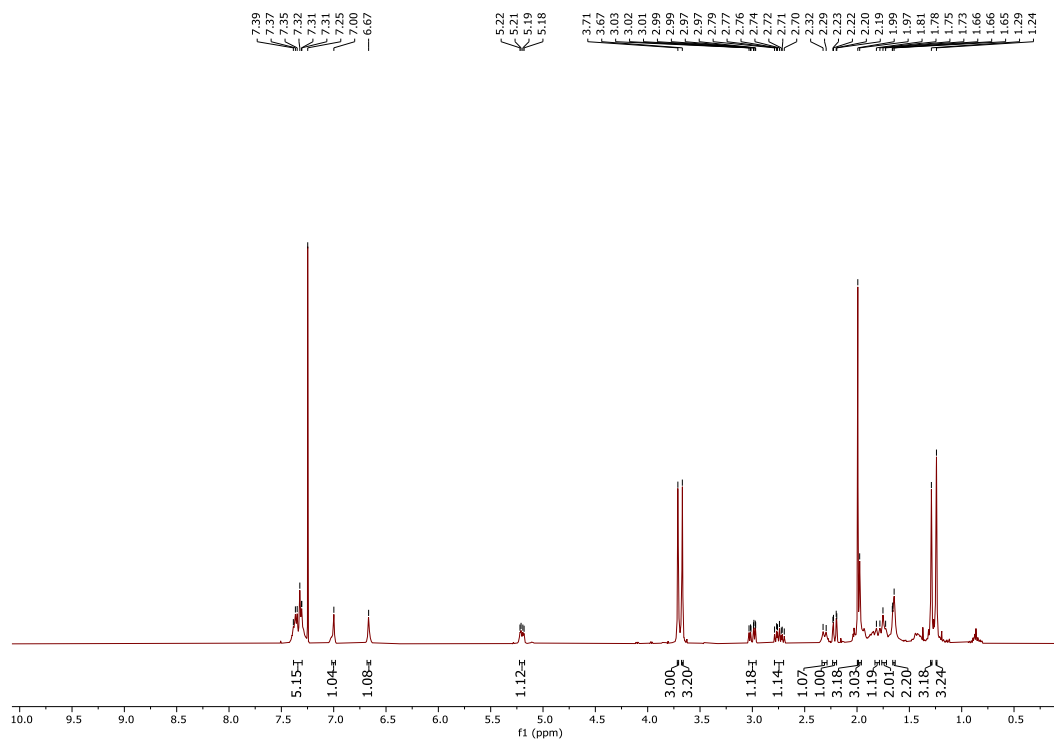 $^1\text{H}$  NMR (400 MHz,  $\text{CDCl}_3$ ) of (+)-**22**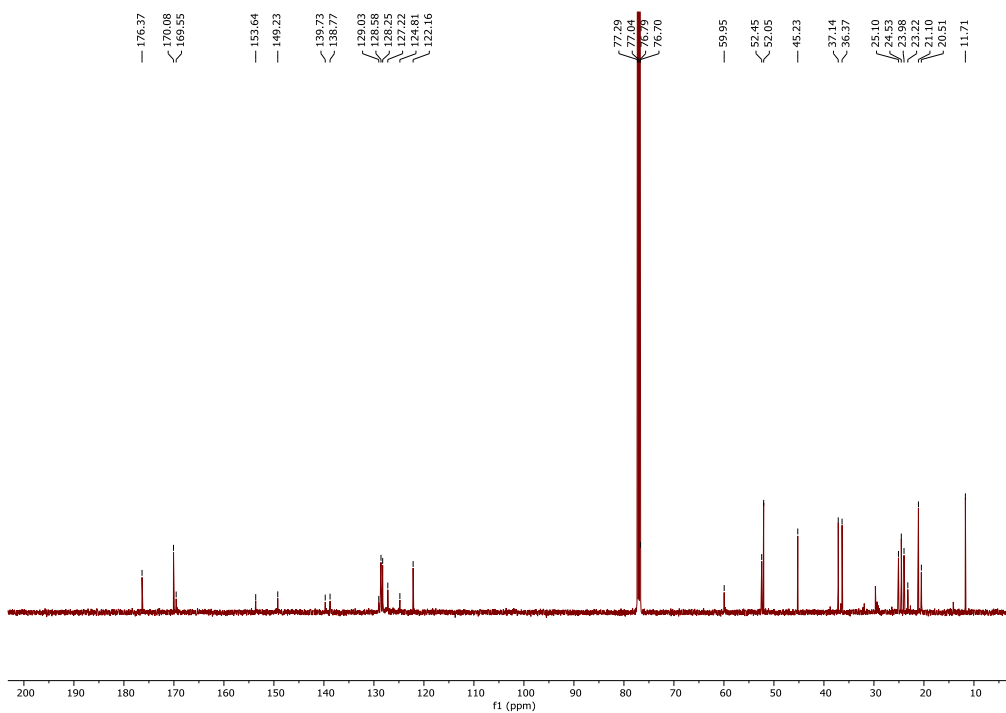 $^{13}\text{C}$  NMR (101 MHz,  $\text{CDCl}_3$ ) of (+)-**22**

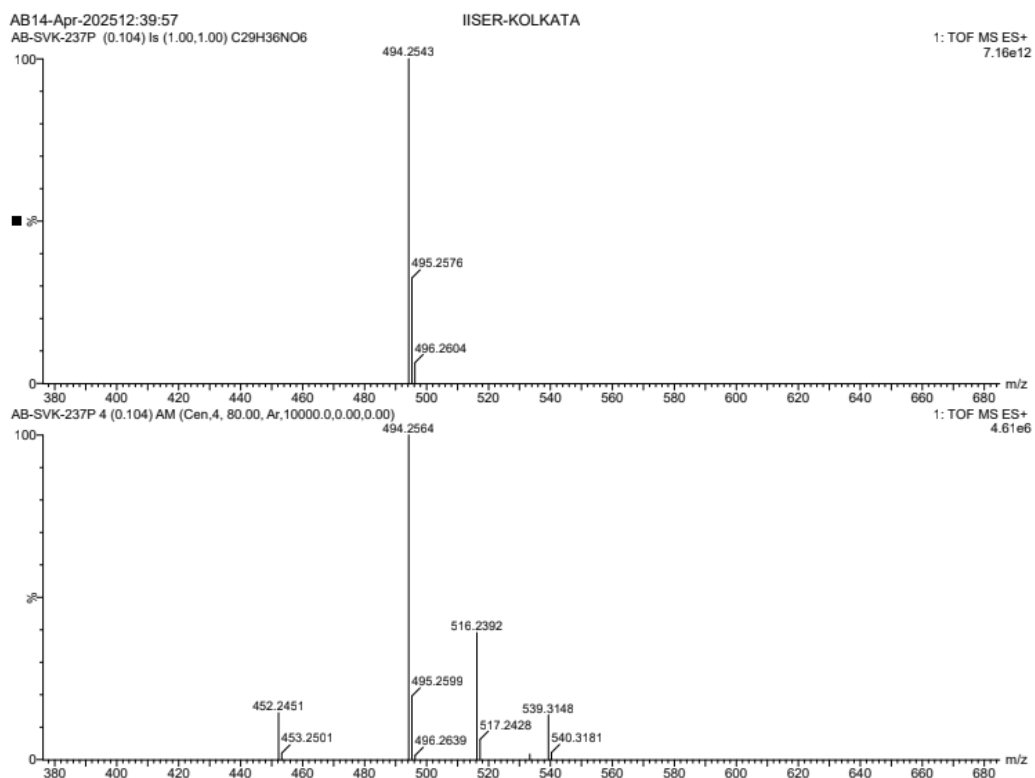

HRMS data of (+)-22

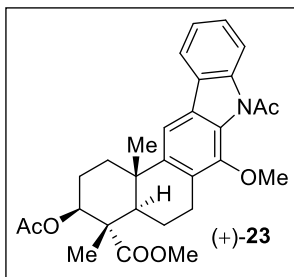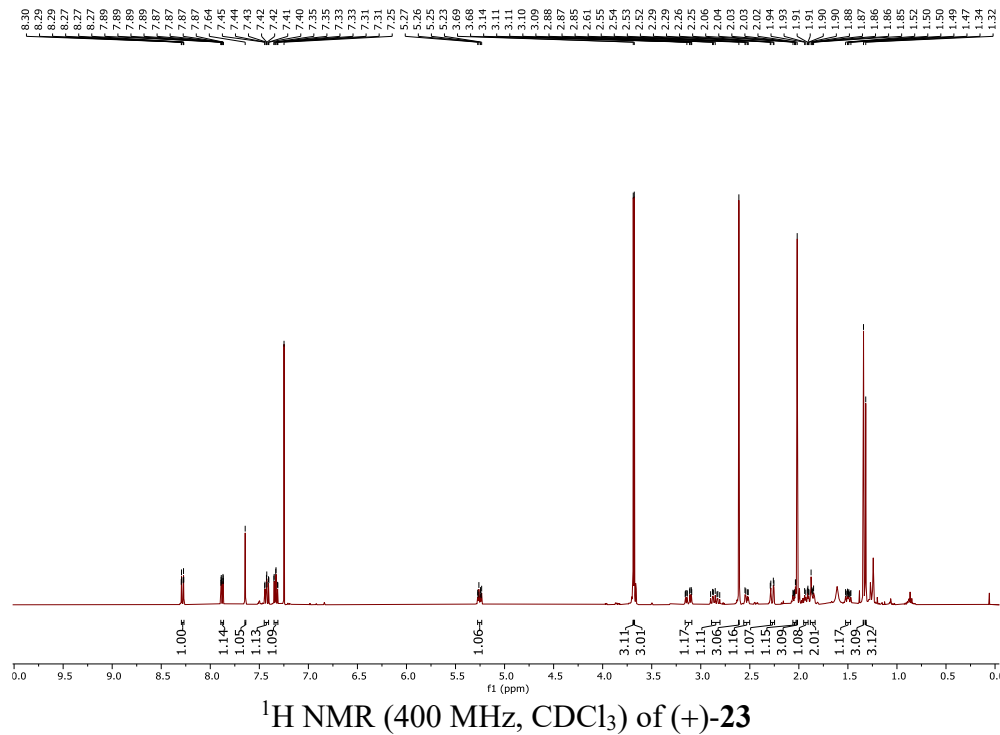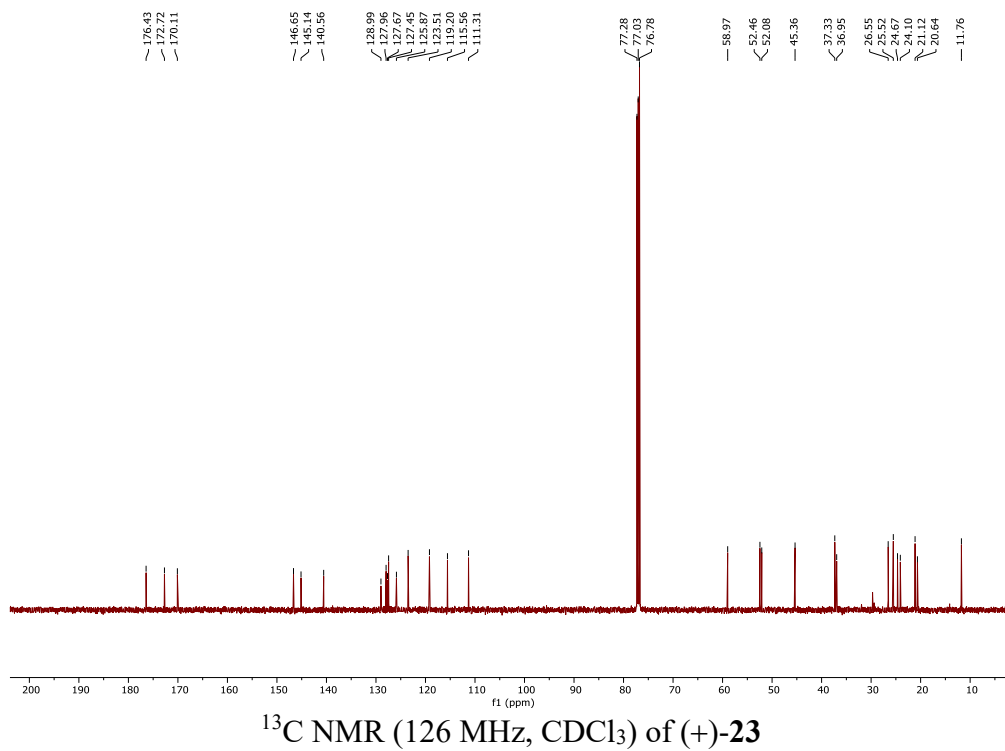

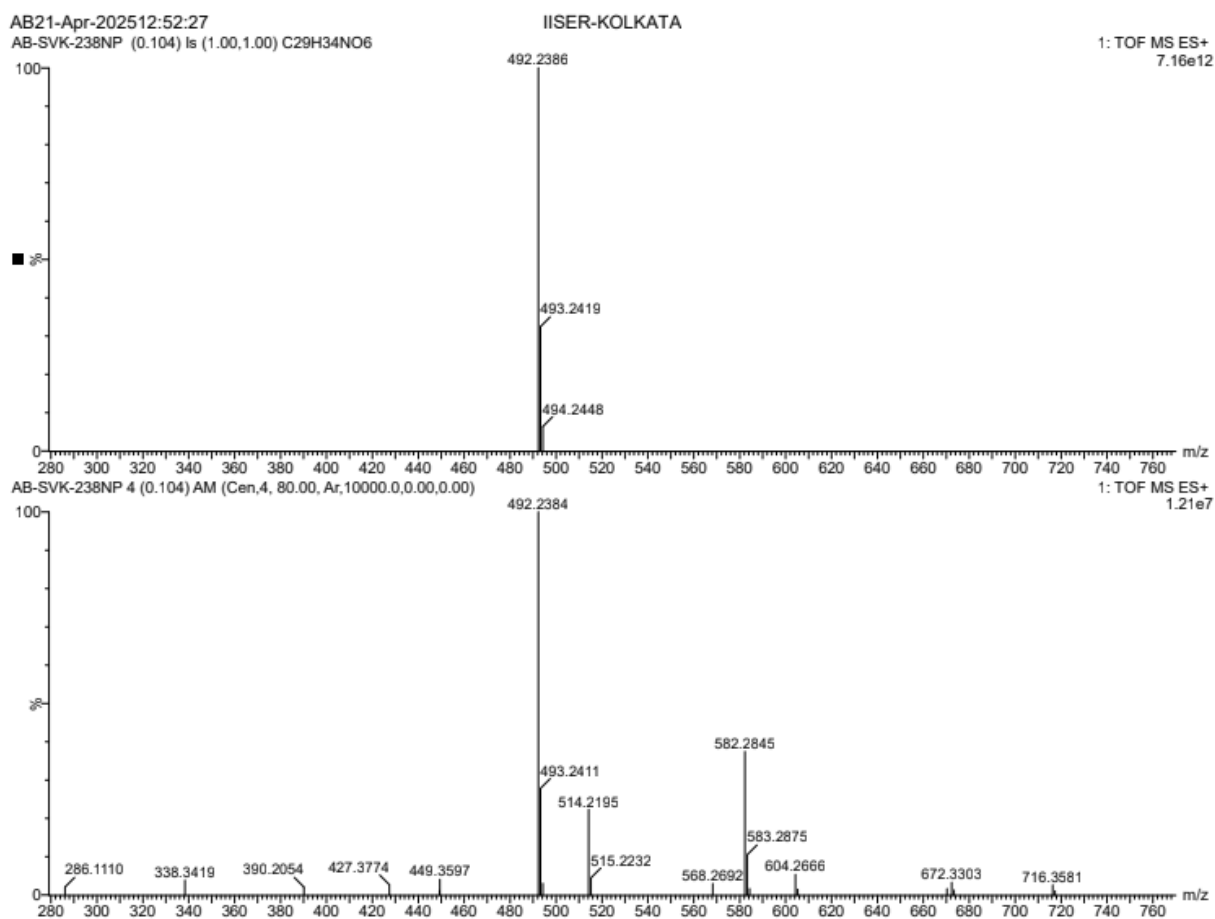

HRMS data of (+)-23

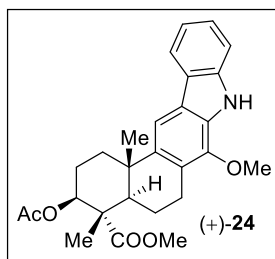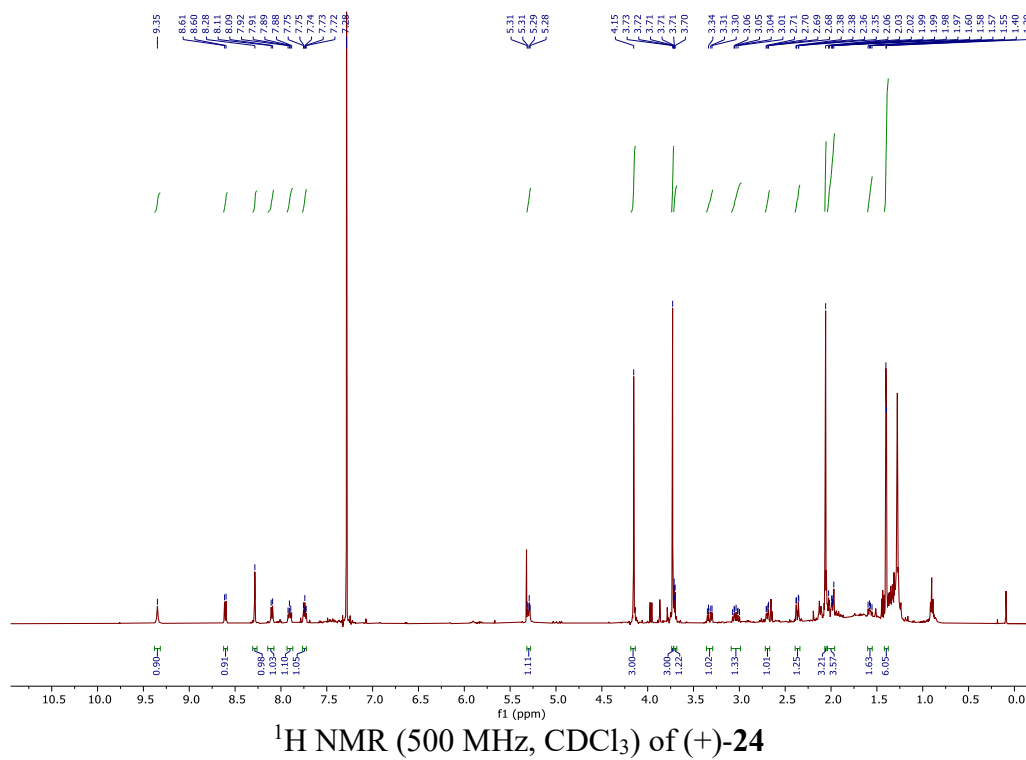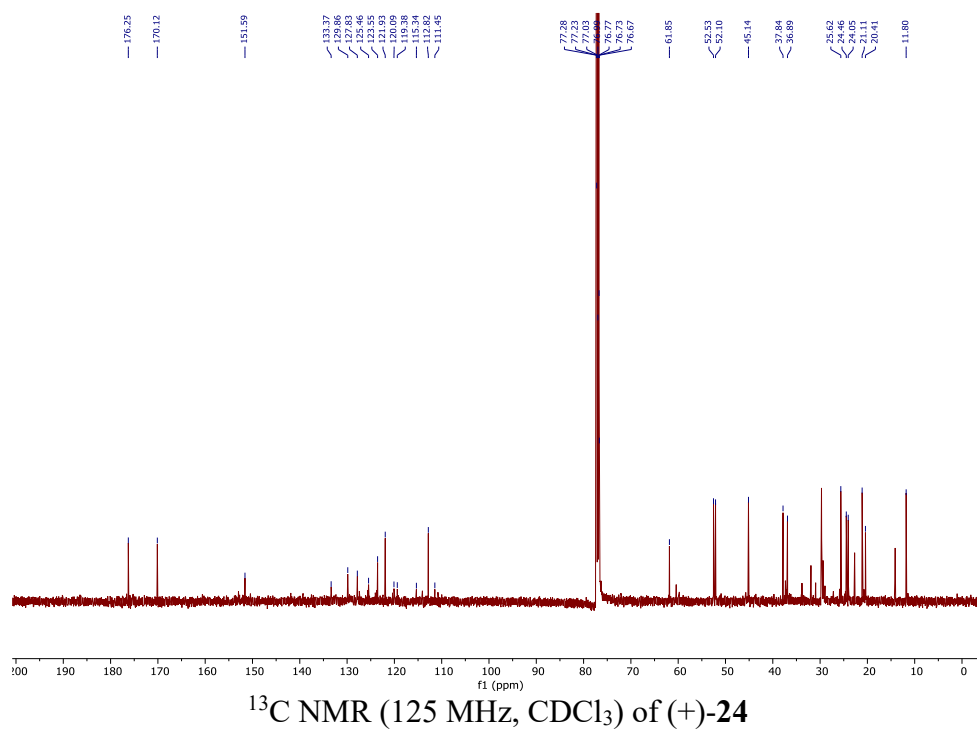

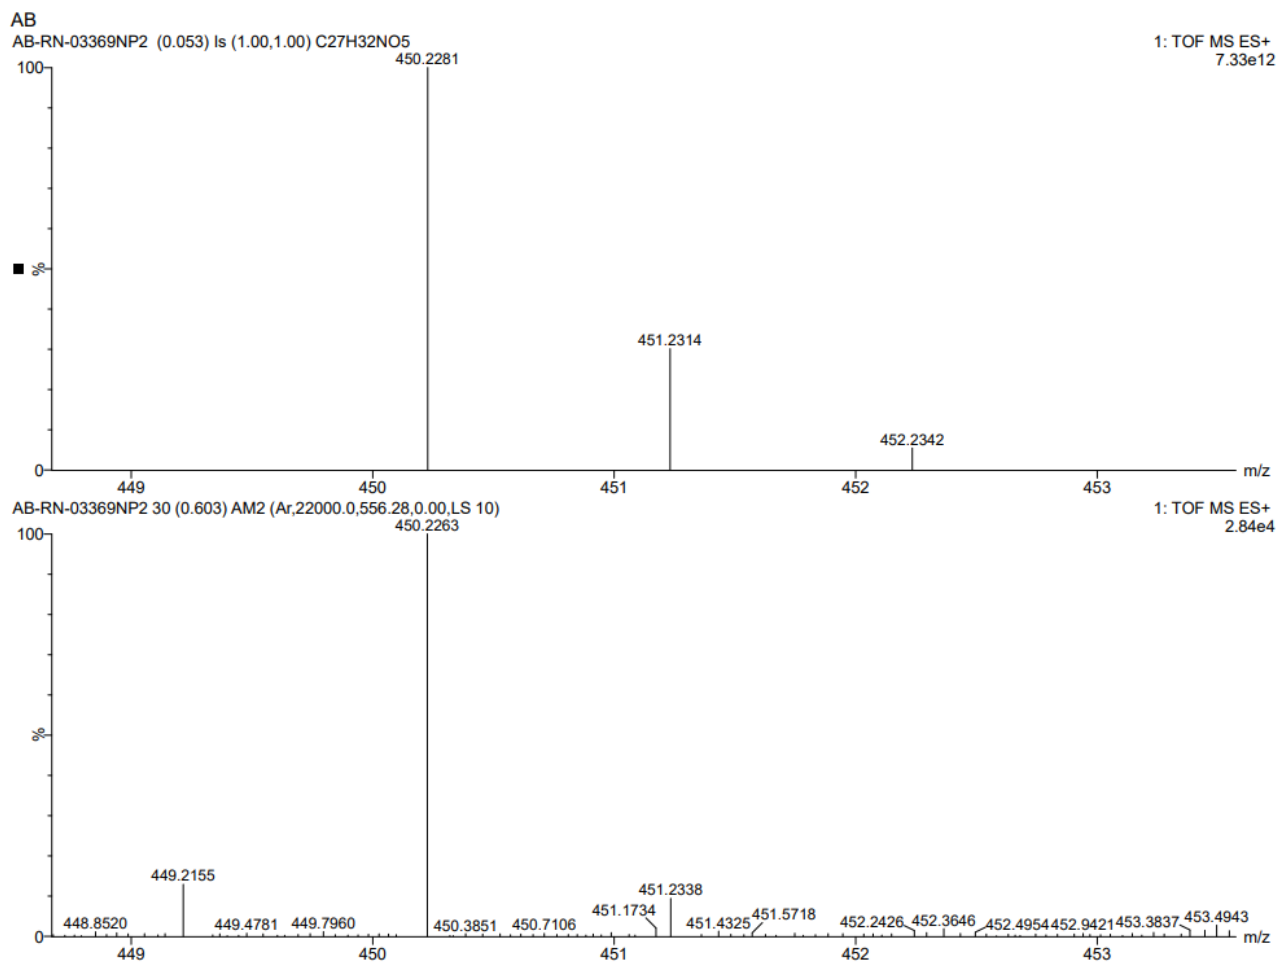HRMS data of (+)-**24**

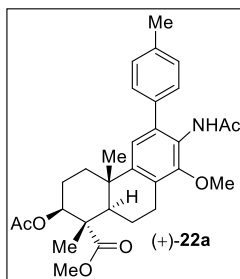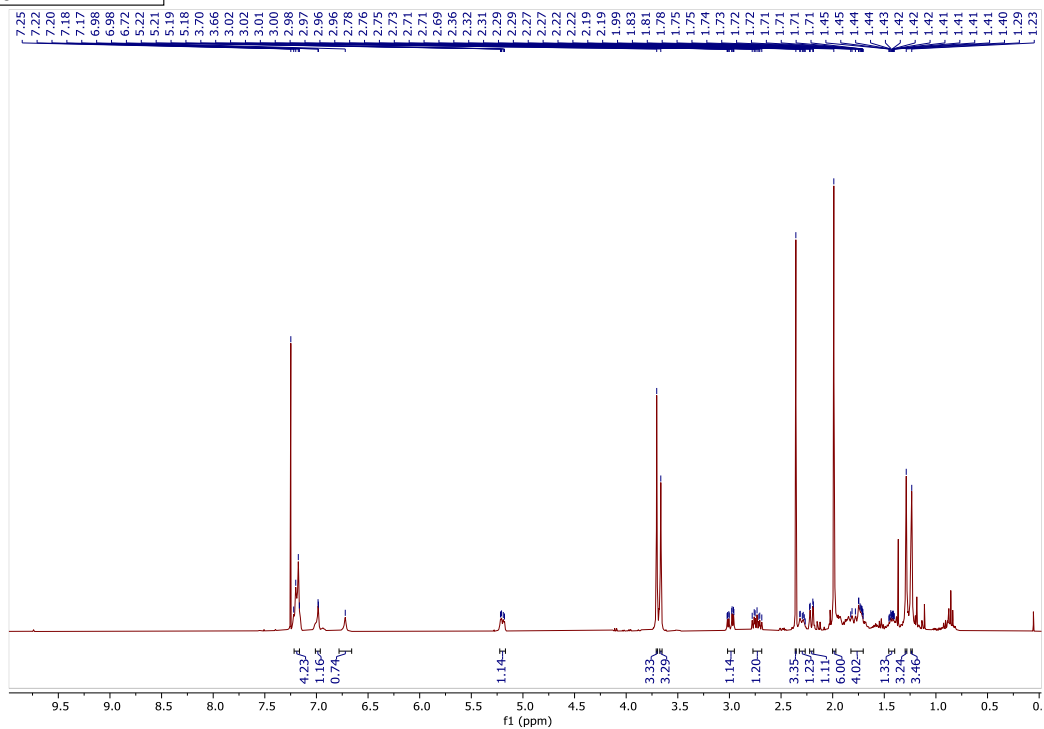 $^1\text{H}$  NMR (400 MHz,  $\text{CDCl}_3$ ) of (+)-22a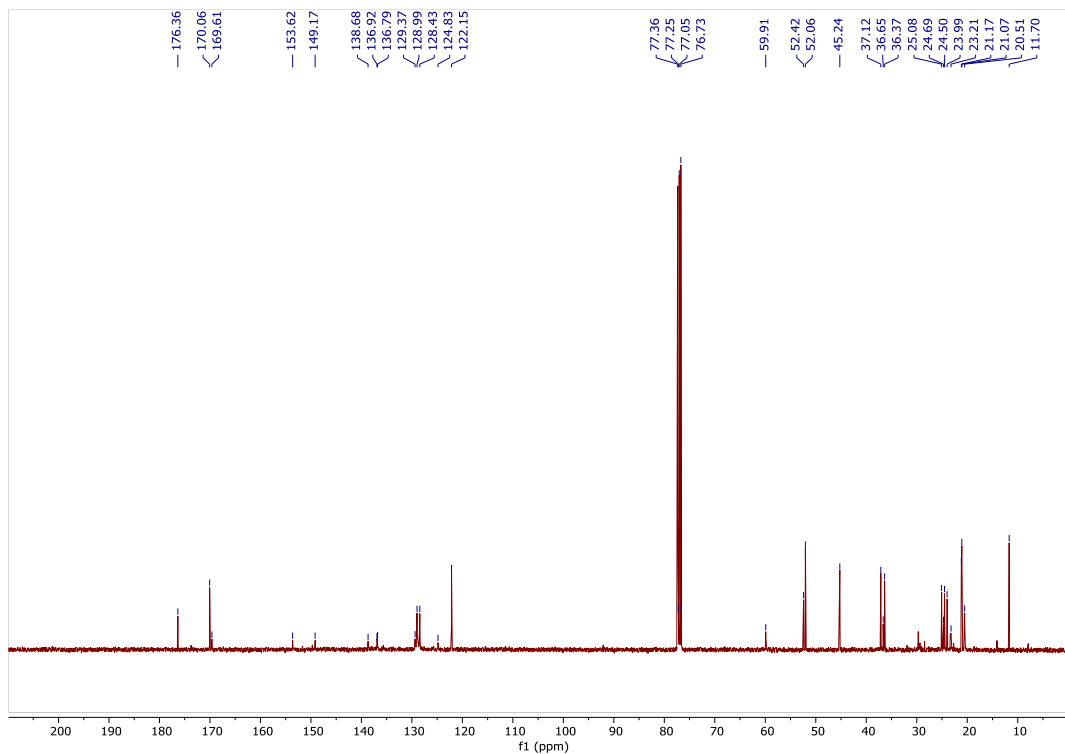 $^{13}\text{C}$  NMR (101 MHz,  $\text{CDCl}_3$ ) of (+)-22a

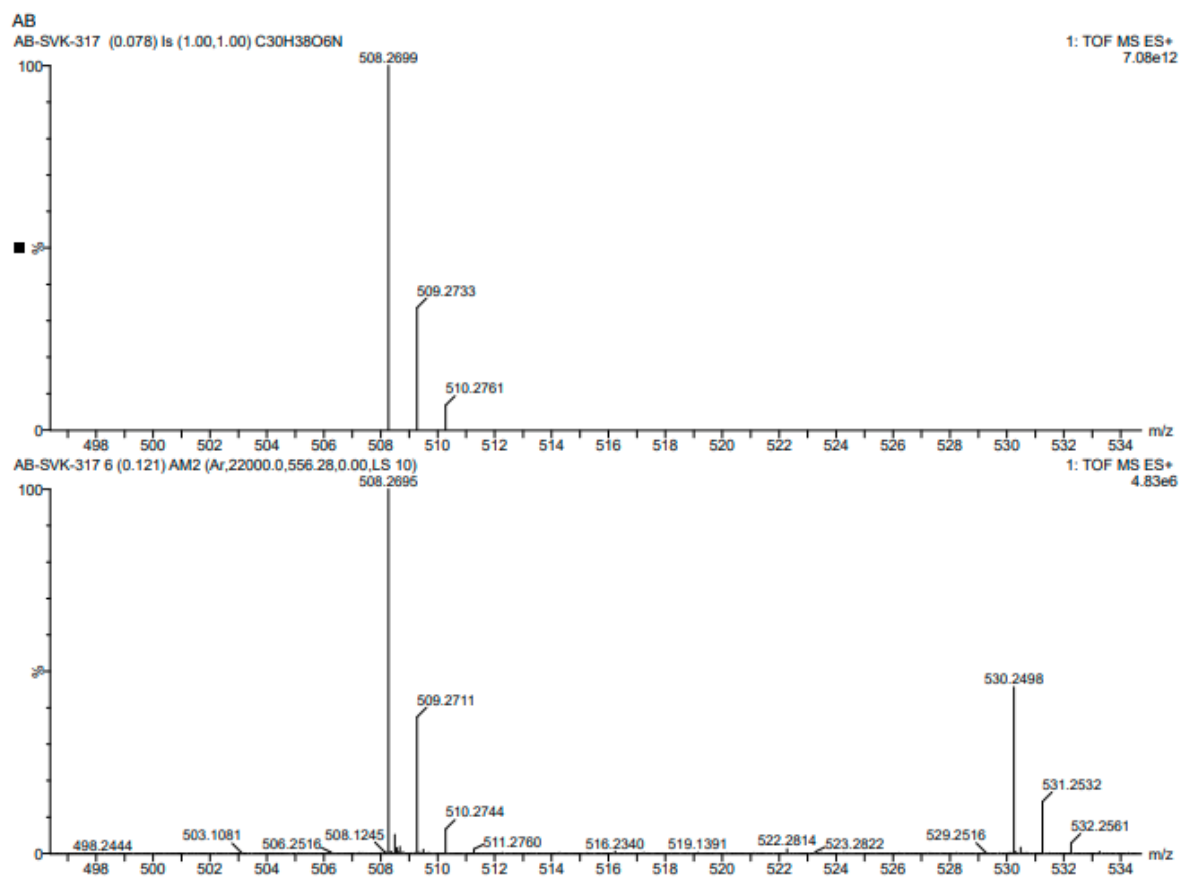HRMS data of (+)-**22a**

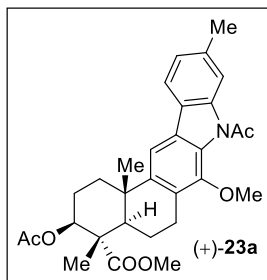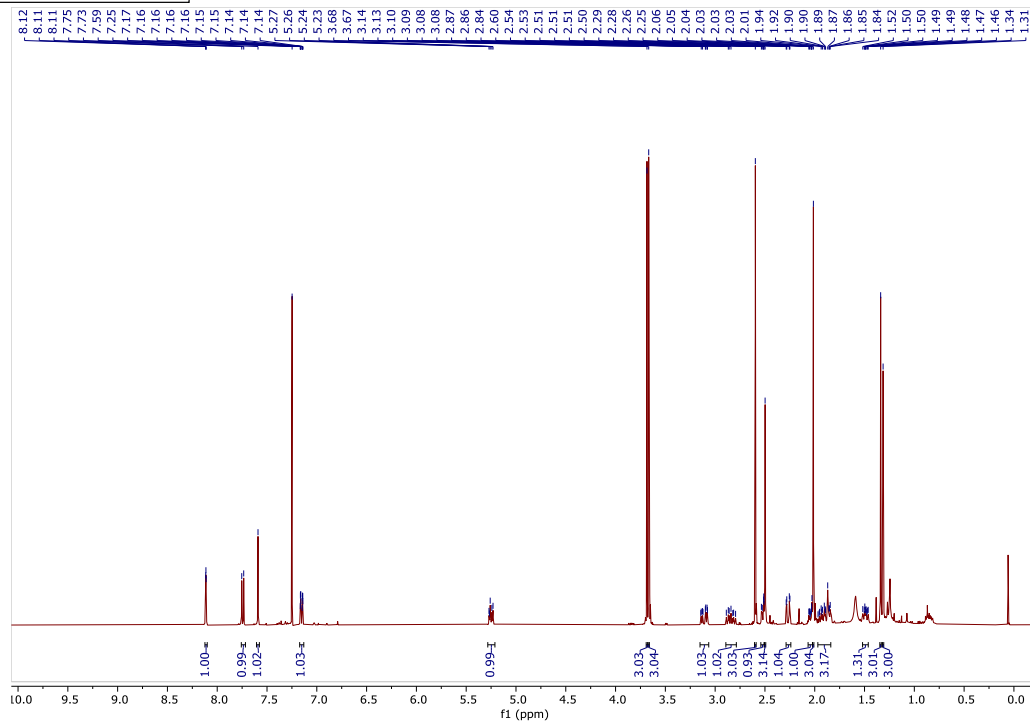 $^1\text{H}$  NMR (400 MHz,  $\text{CDCl}_3$ ) of (+)-23a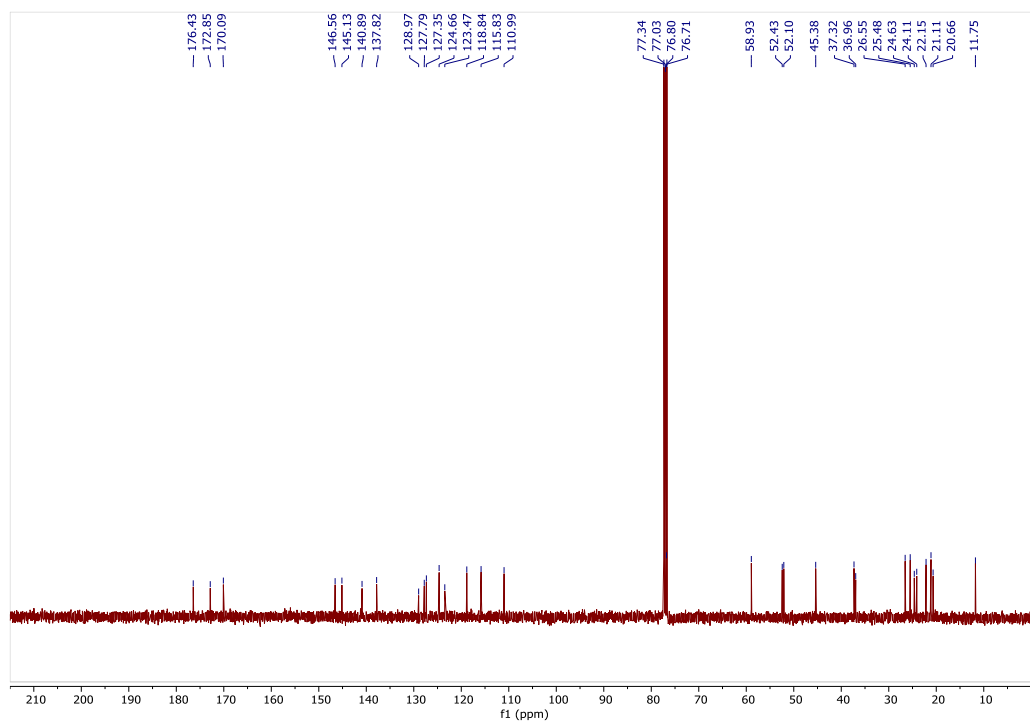 $^{13}\text{C}$  NMR (101 MHz,  $\text{CDCl}_3$ ) of (+)-23a

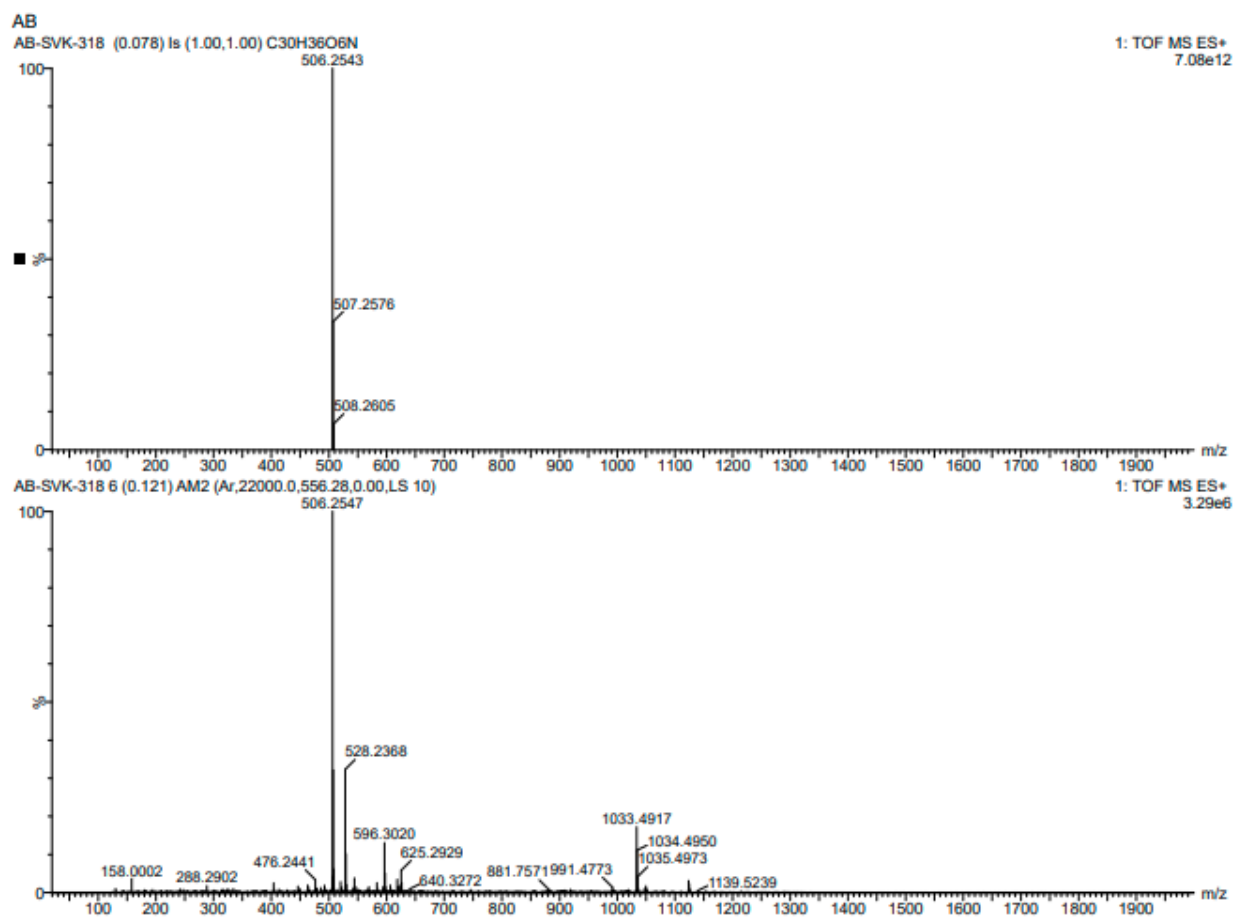HRMS data of (+)-**23a**

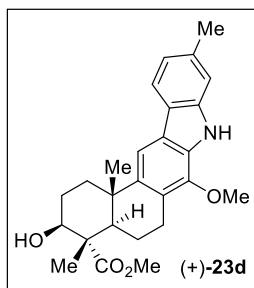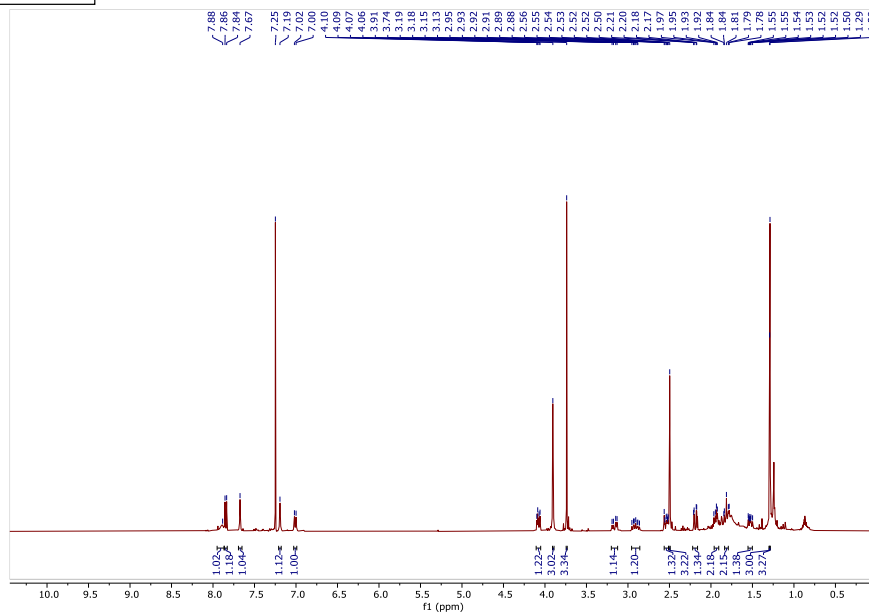<sup>1</sup>H NMR (400 MHz, CDCl<sub>3</sub>) of (+)-**23d**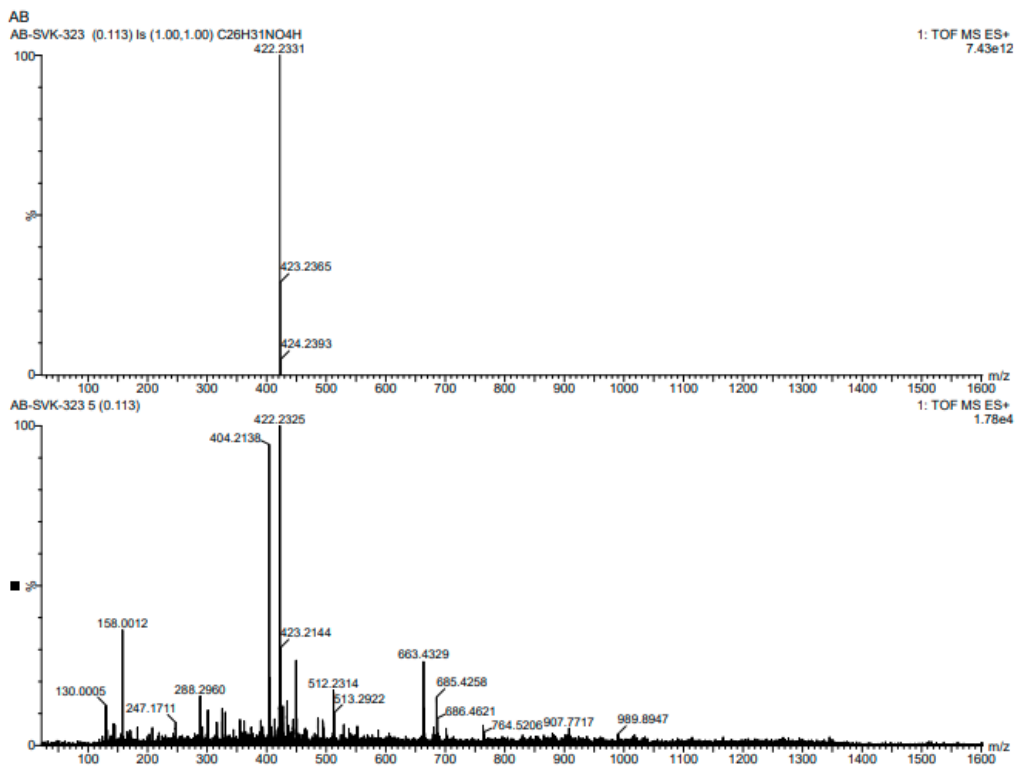HRMS data of (+)-**23d**

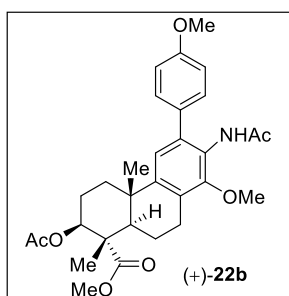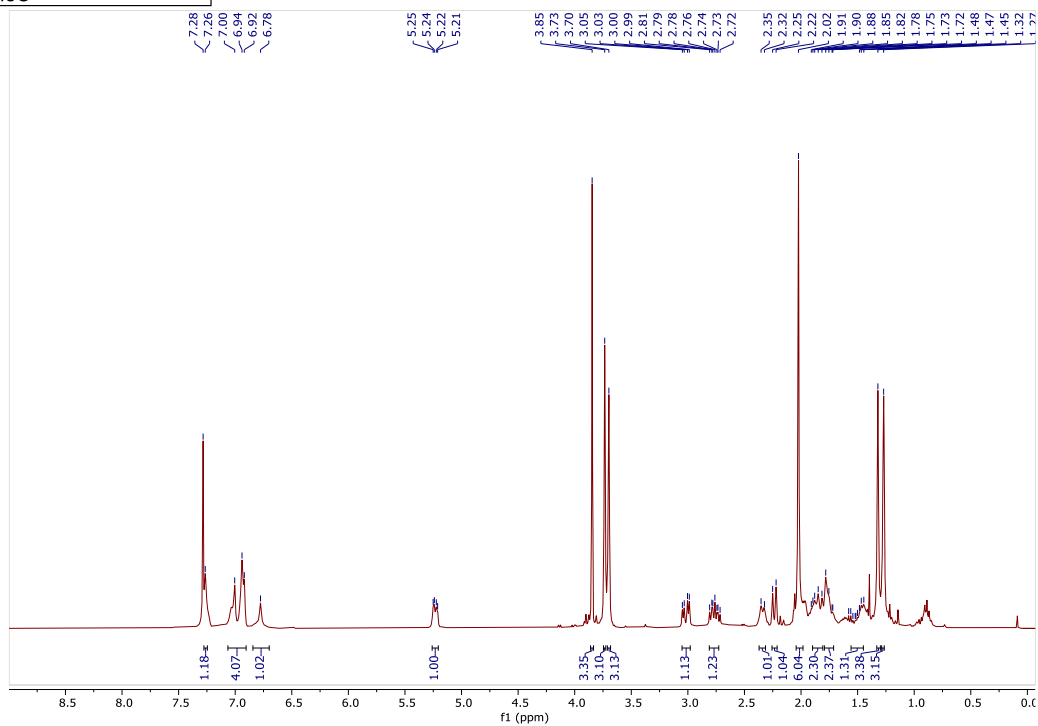 $^1\text{H NMR}$  (400 MHz,  $\text{CDCl}_3$ ) of (+)-**22b**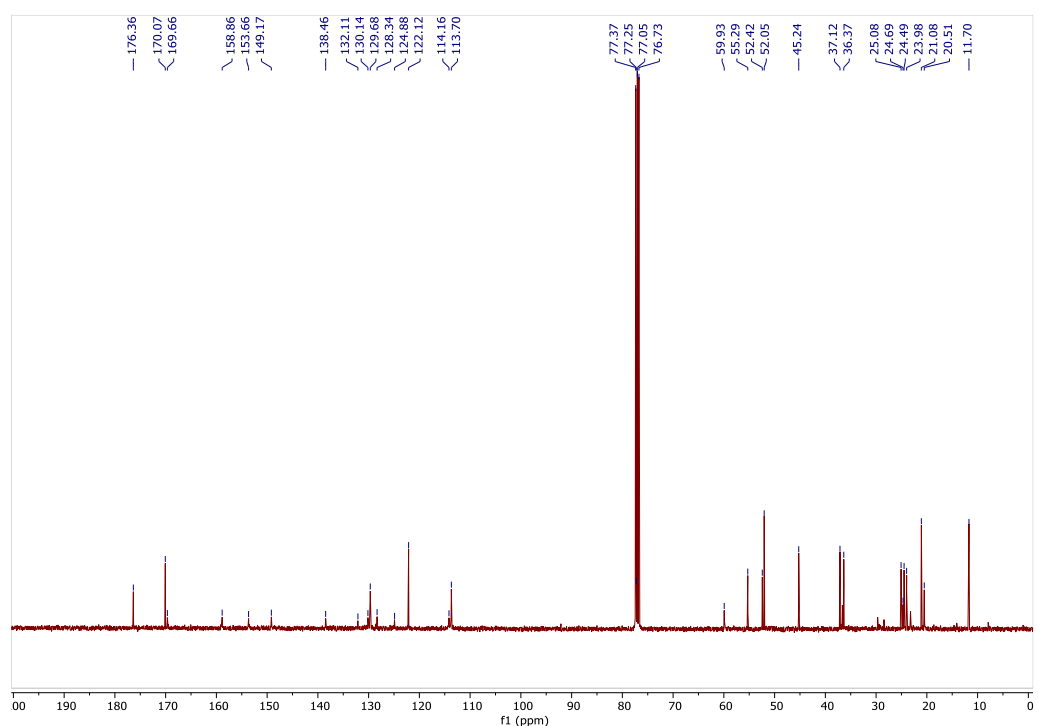 $^{13}\text{C NMR}$  (101 MHz,  $\text{CDCl}_3$ ) of (+)-**22b**

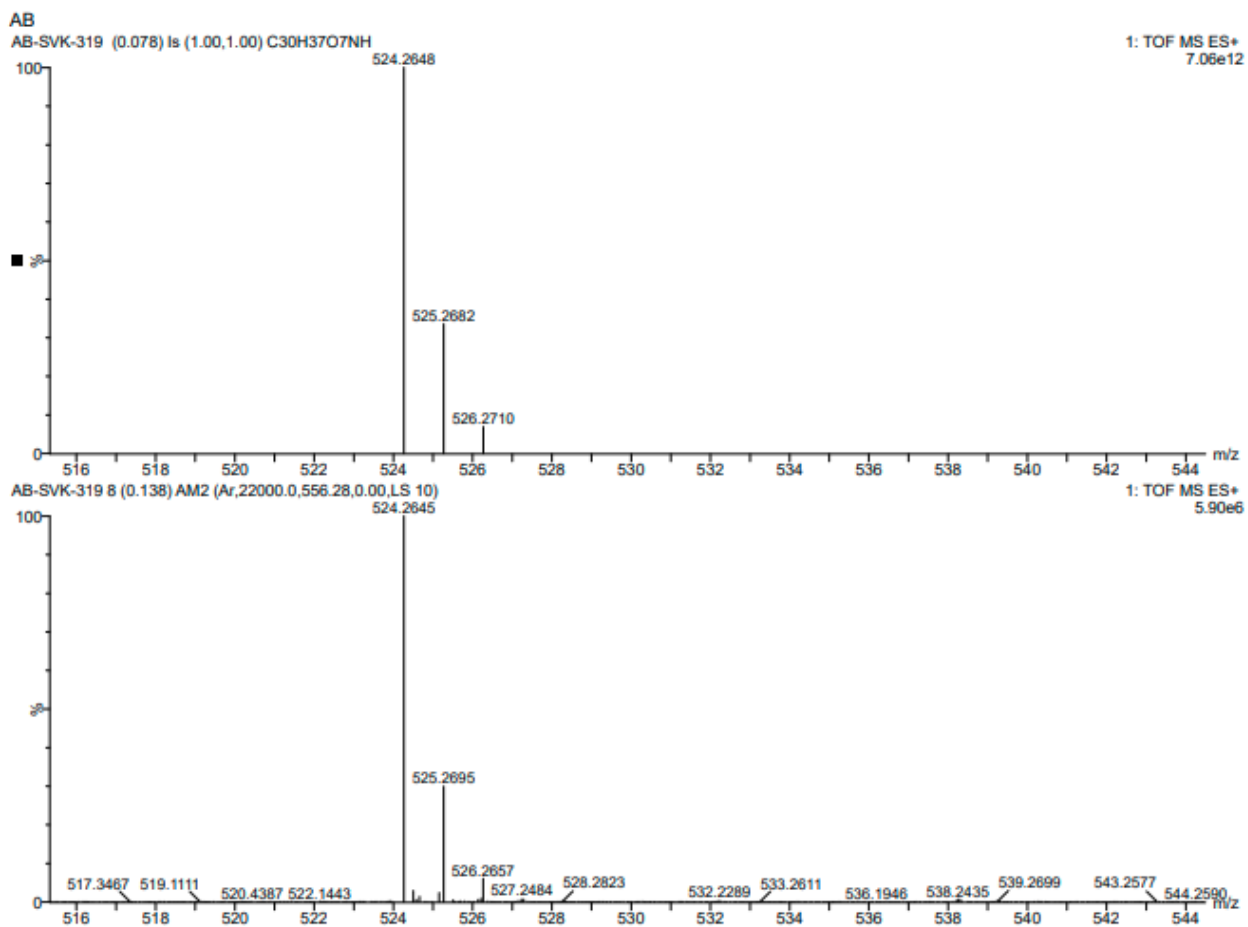HRMS data of (+)-**22b**

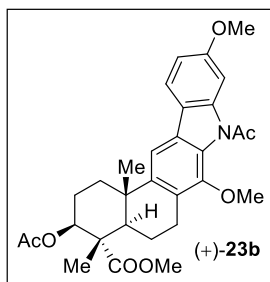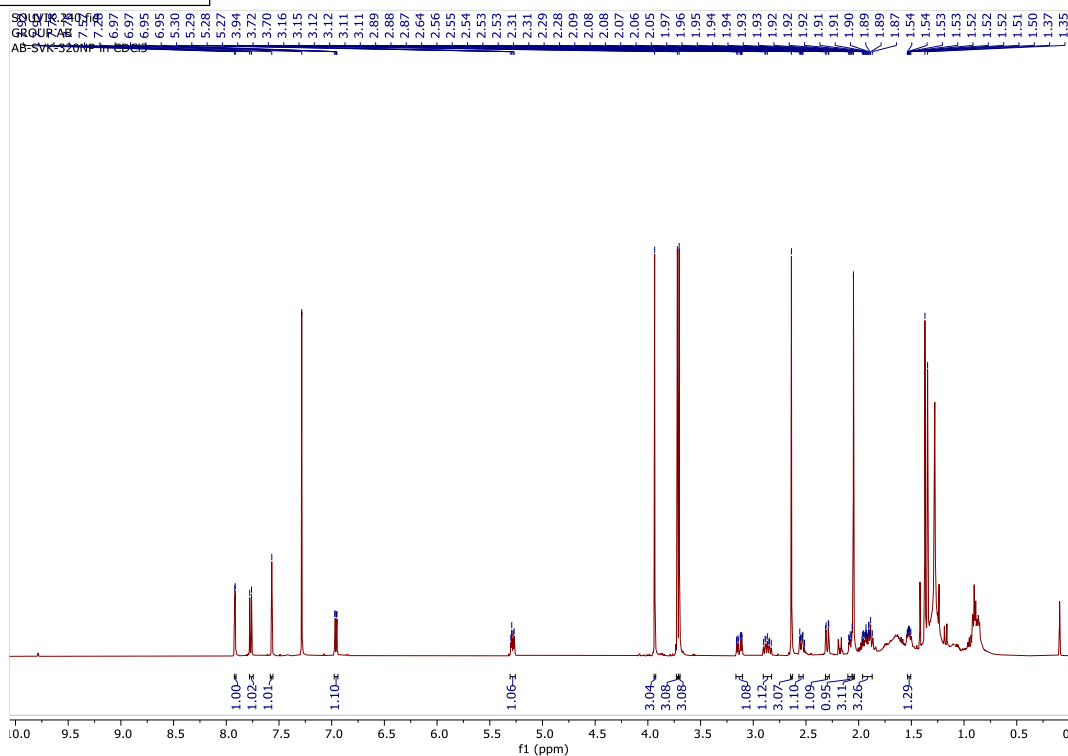 $^1\text{H NMR}$  (400 MHz,  $\text{CDCl}_3$ ) of (+)-23b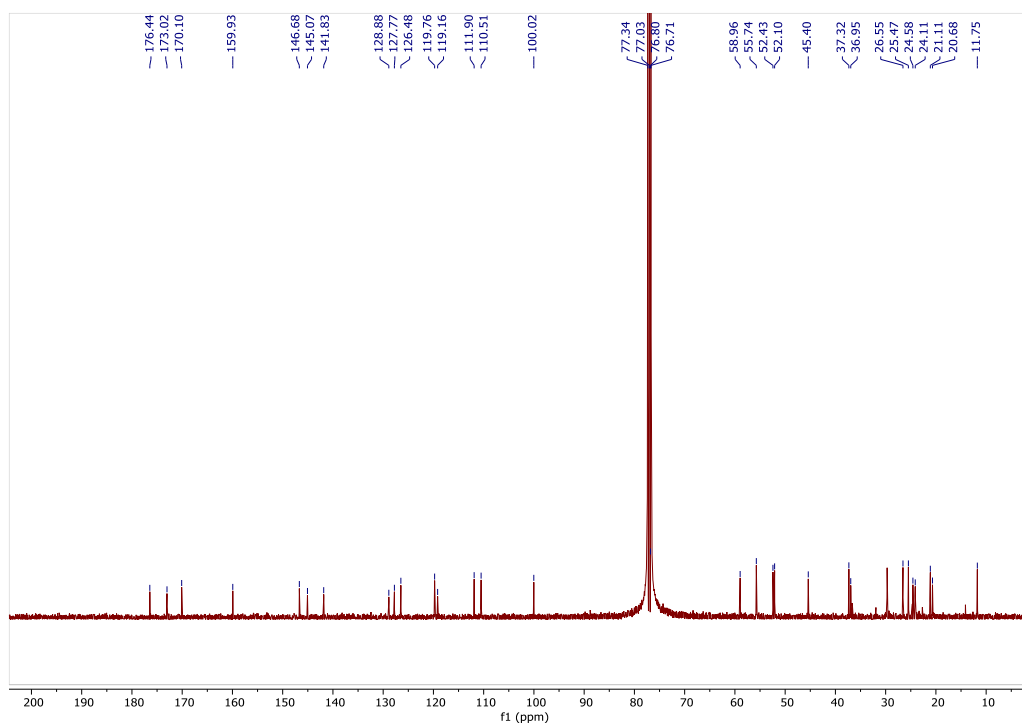 $^{13}\text{C NMR}$  (101 MHz,  $\text{CDCl}_3$ ) of (+)-23b

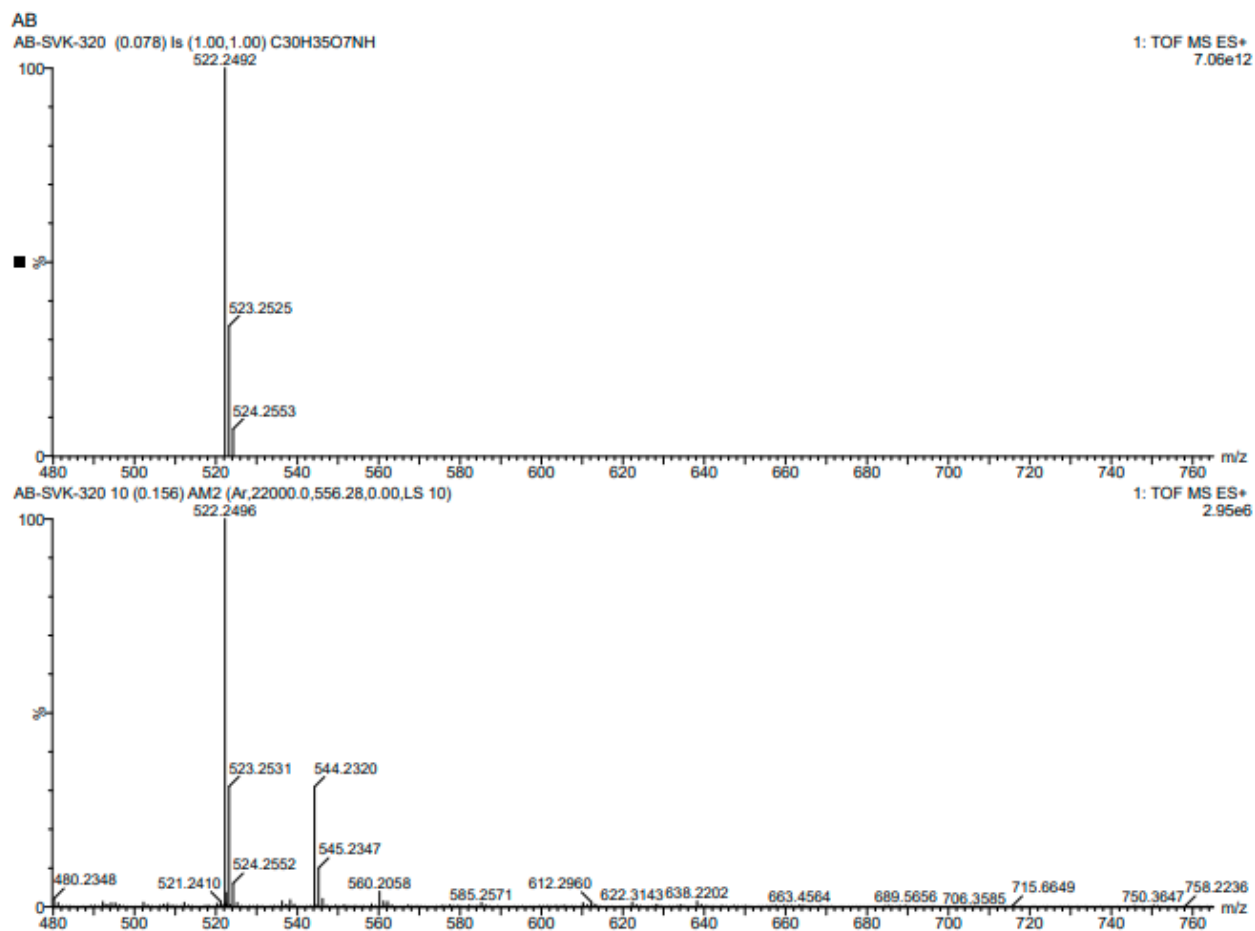HRMS data of (+)-**23b**

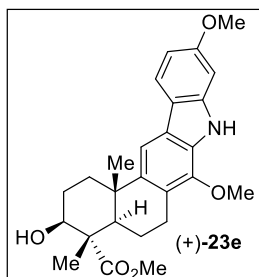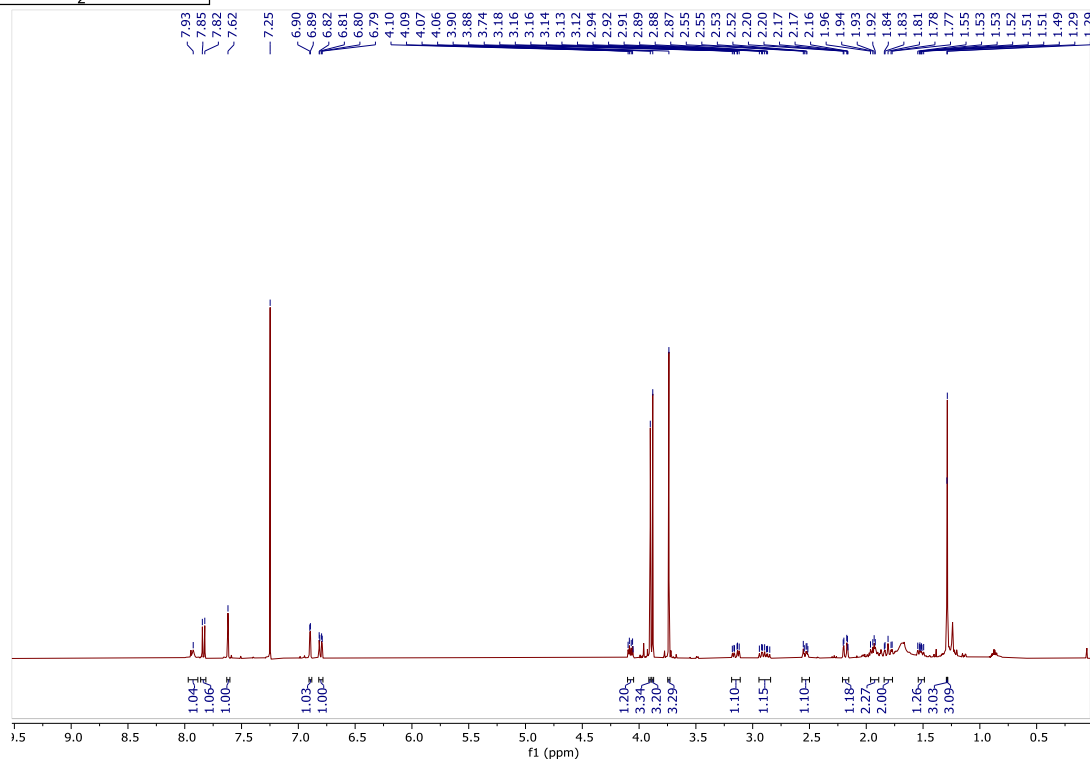<sup>1</sup>H NMR (400 MHz, CDCl<sub>3</sub>) of (+)-23e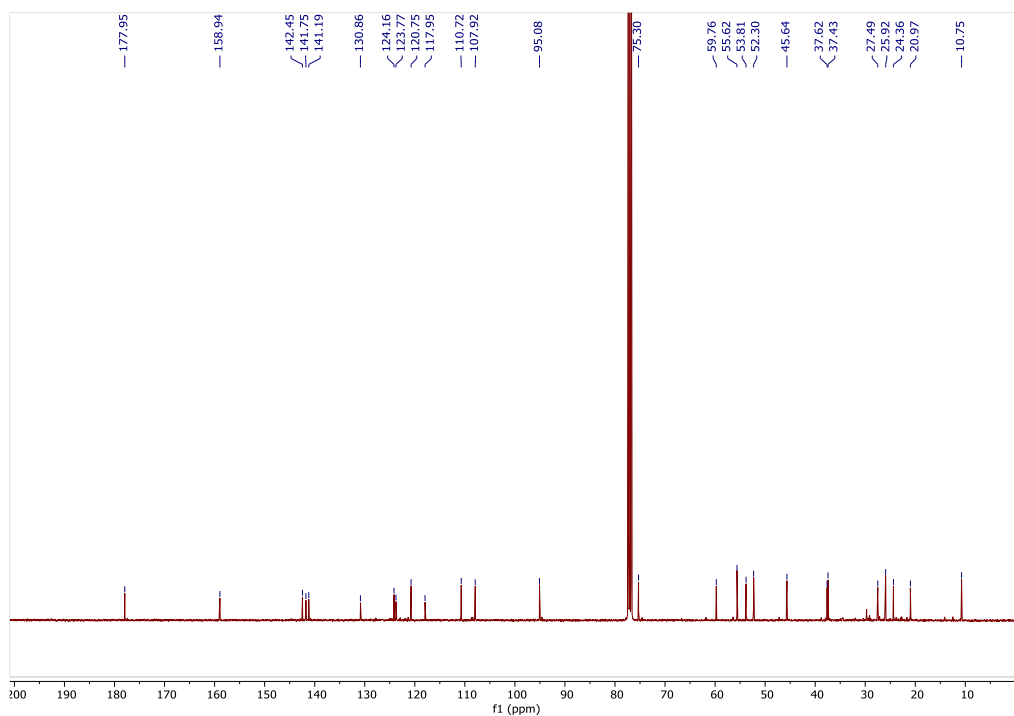<sup>13</sup>C NMR (101 MHz, CDCl<sub>3</sub>) of (+)-23e

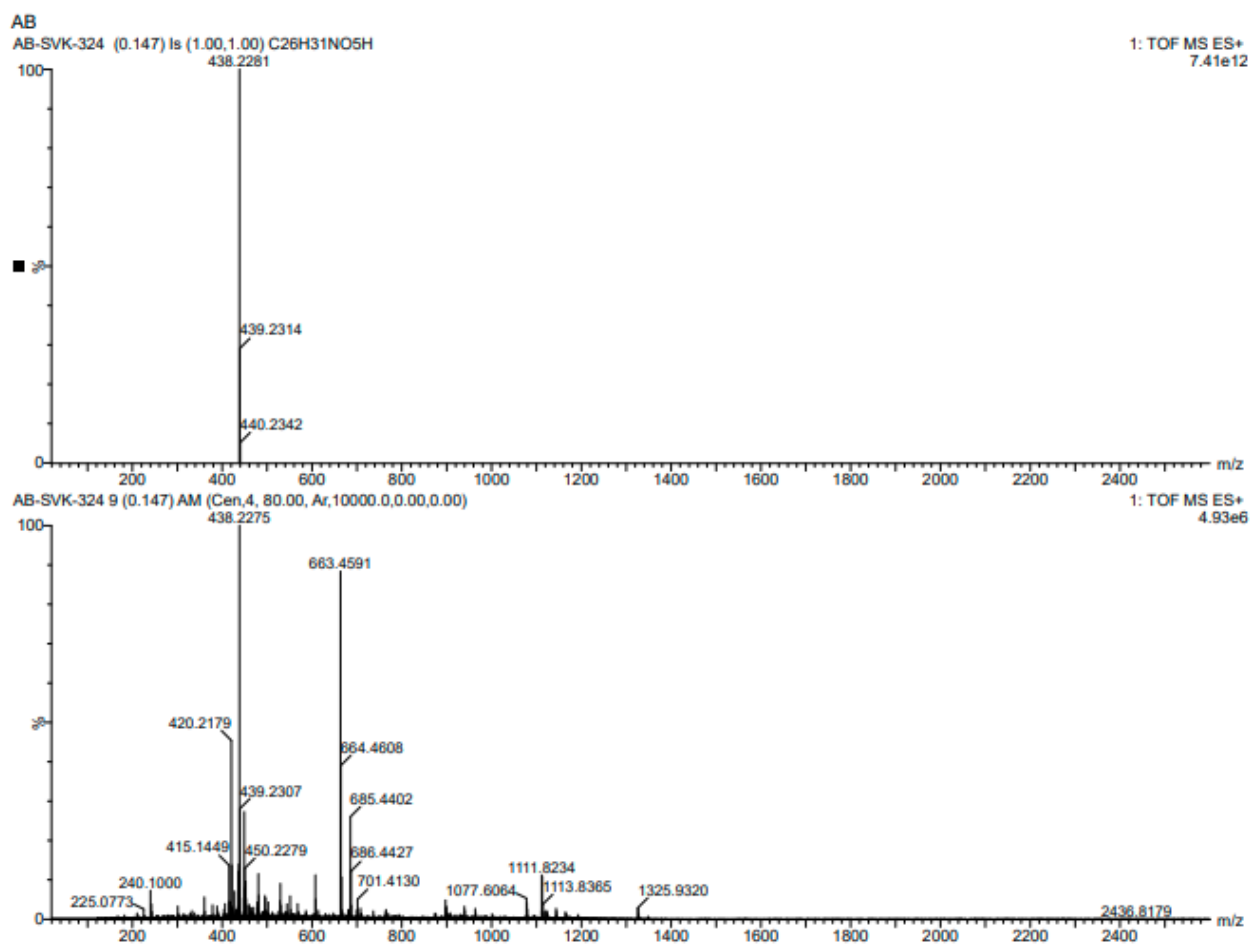HRMS data of (+)-**23e**

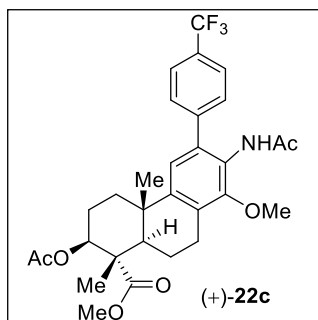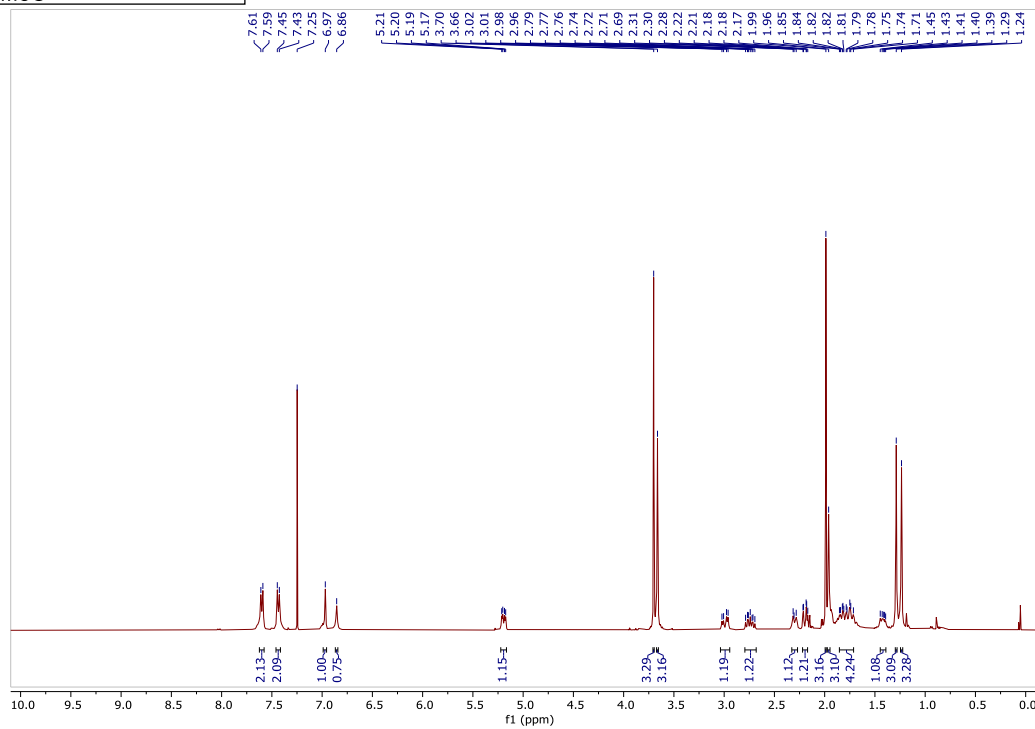 $^1\text{H}$  NMR (400 MHz,  $\text{CDCl}_3$ ) of (+)-22c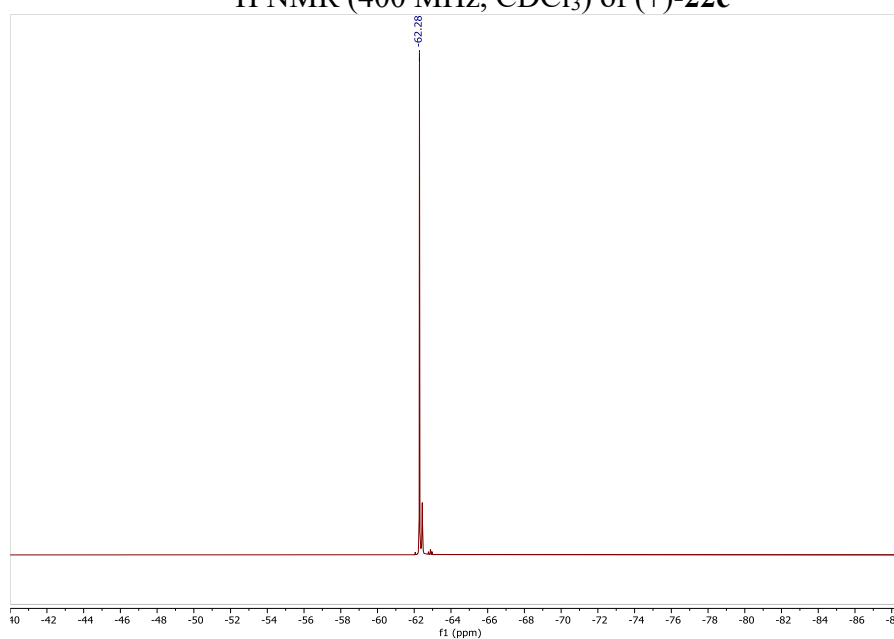 $^{19}\text{F}$  NMR (376 MHz,  $\text{CDCl}_3$ ) of (+)-22c

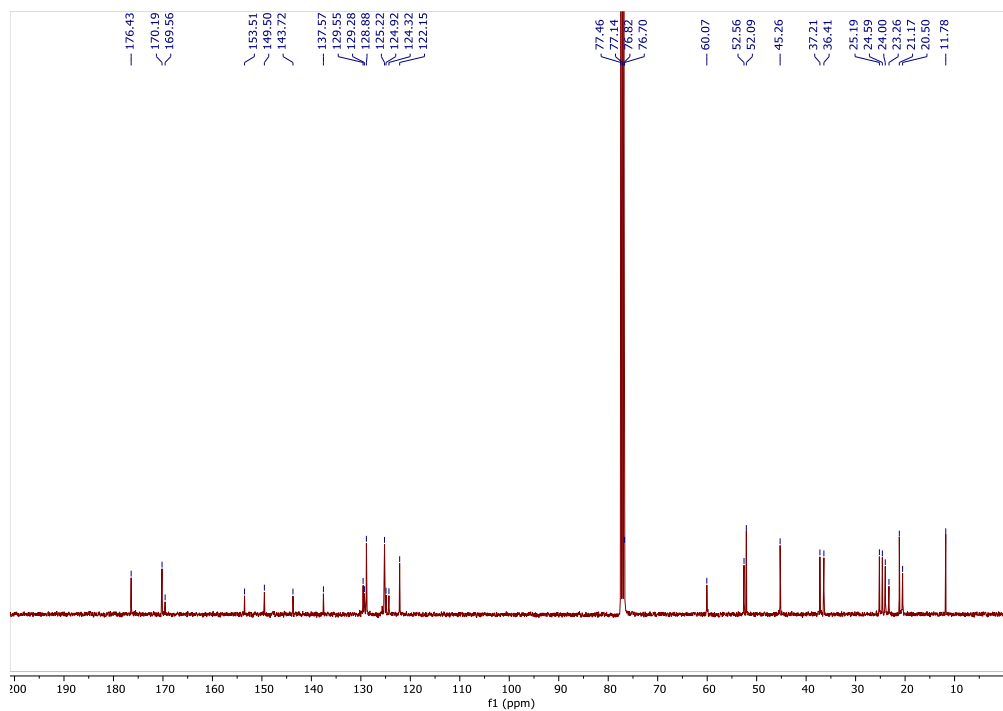
 $^{13}\text{C}\{^{19}\text{F}\}\{^1\text{H}\}$  NMR (101 MHz,  $\text{CDCl}_3$ ) of (+)-**22c**
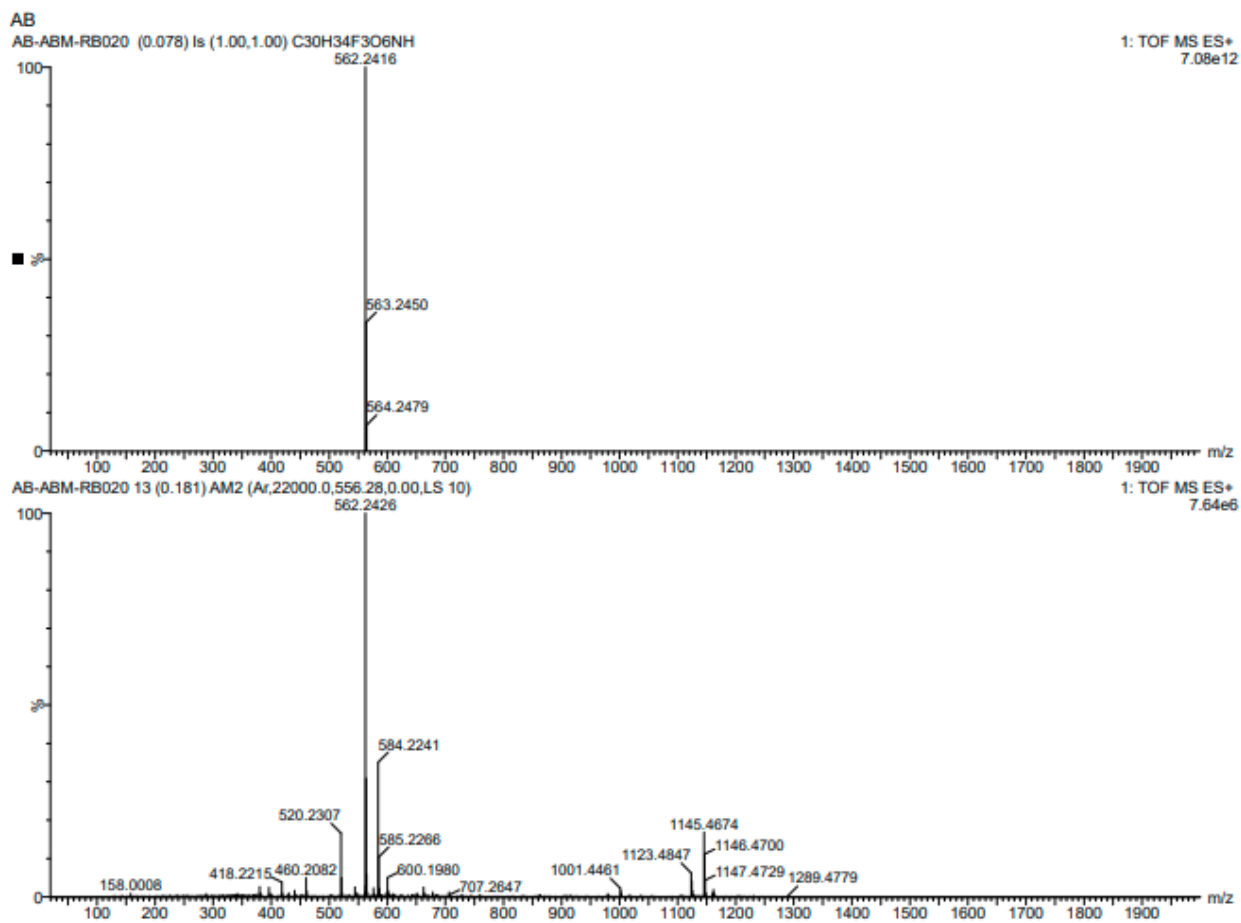HRMS data of (+)-**22c**

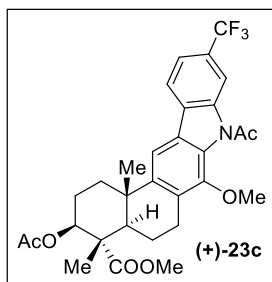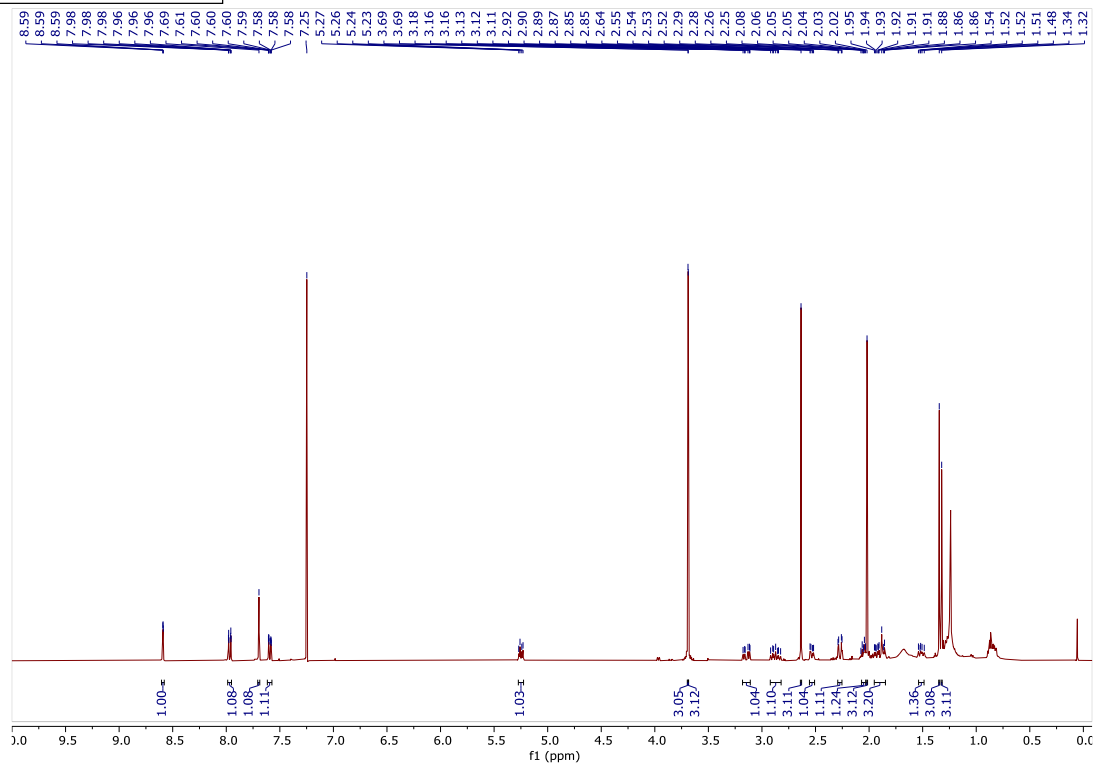

<sup>1</sup>H NMR (400 MHz, CDCl<sub>3</sub>) of (+)-23c

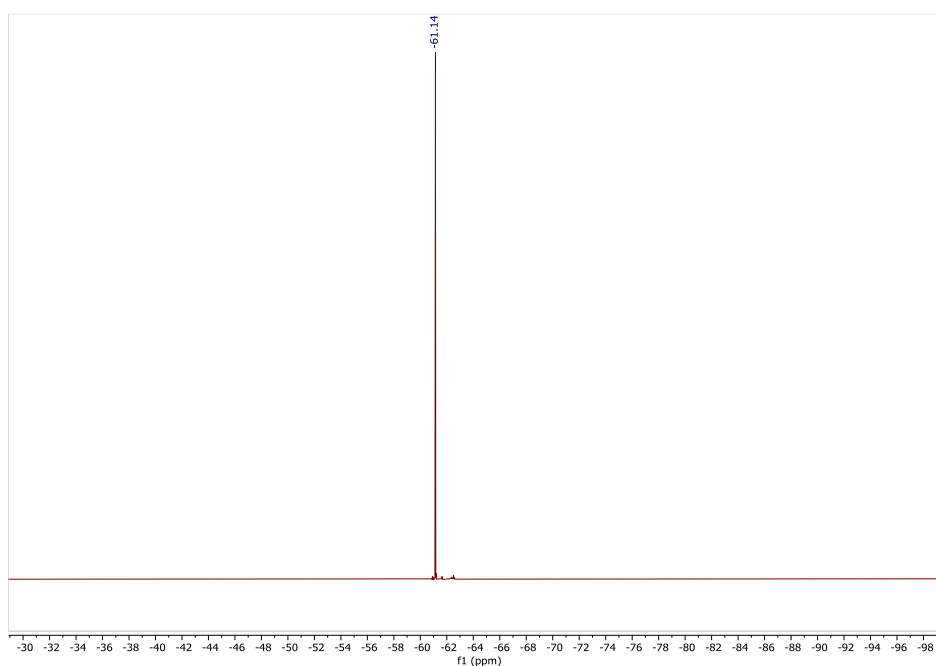

<sup>19</sup>F NMR (376 MHz, CDCl<sub>3</sub>) of (+)-23c

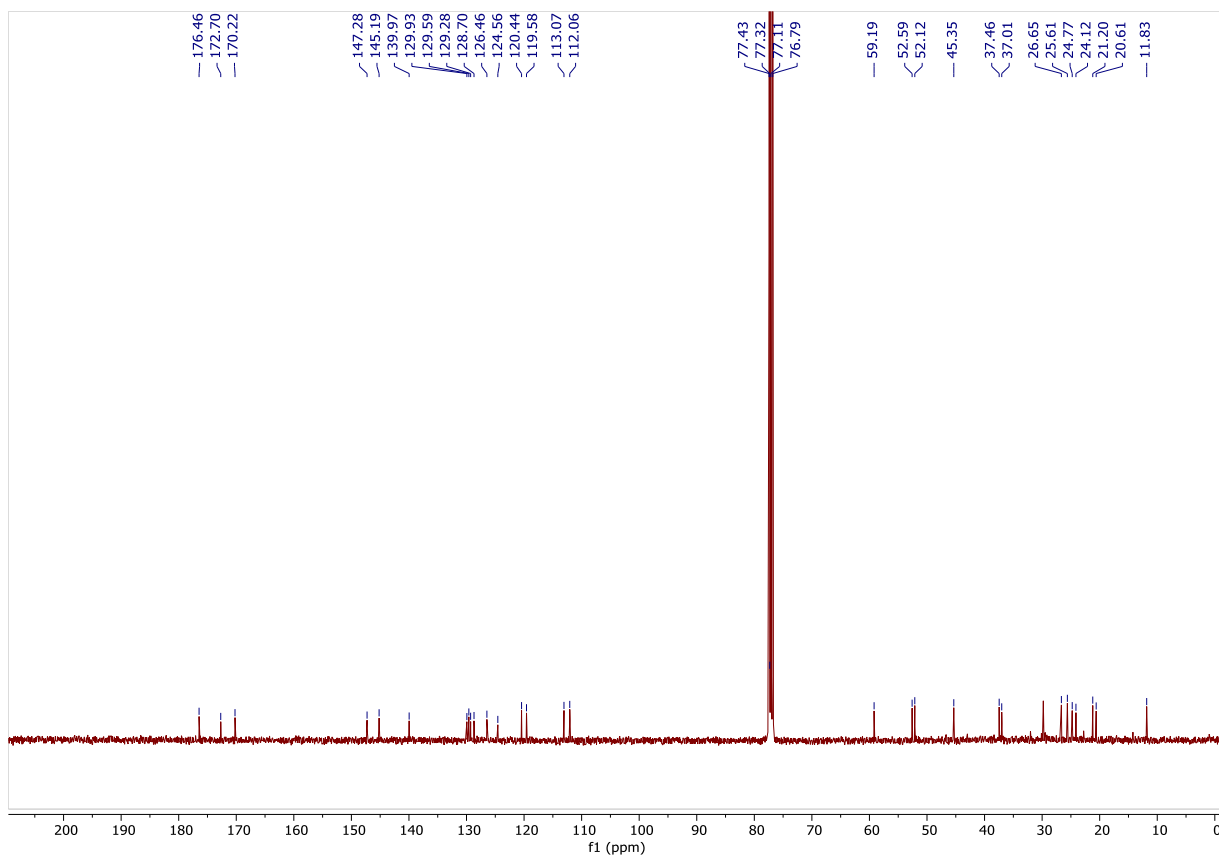
 $^{13}\text{C}\{^{19}\text{F}\}\{^1\text{H}\}$  NMR (101 MHz,  $\text{CDCl}_3$ ) of (+)-**23c**
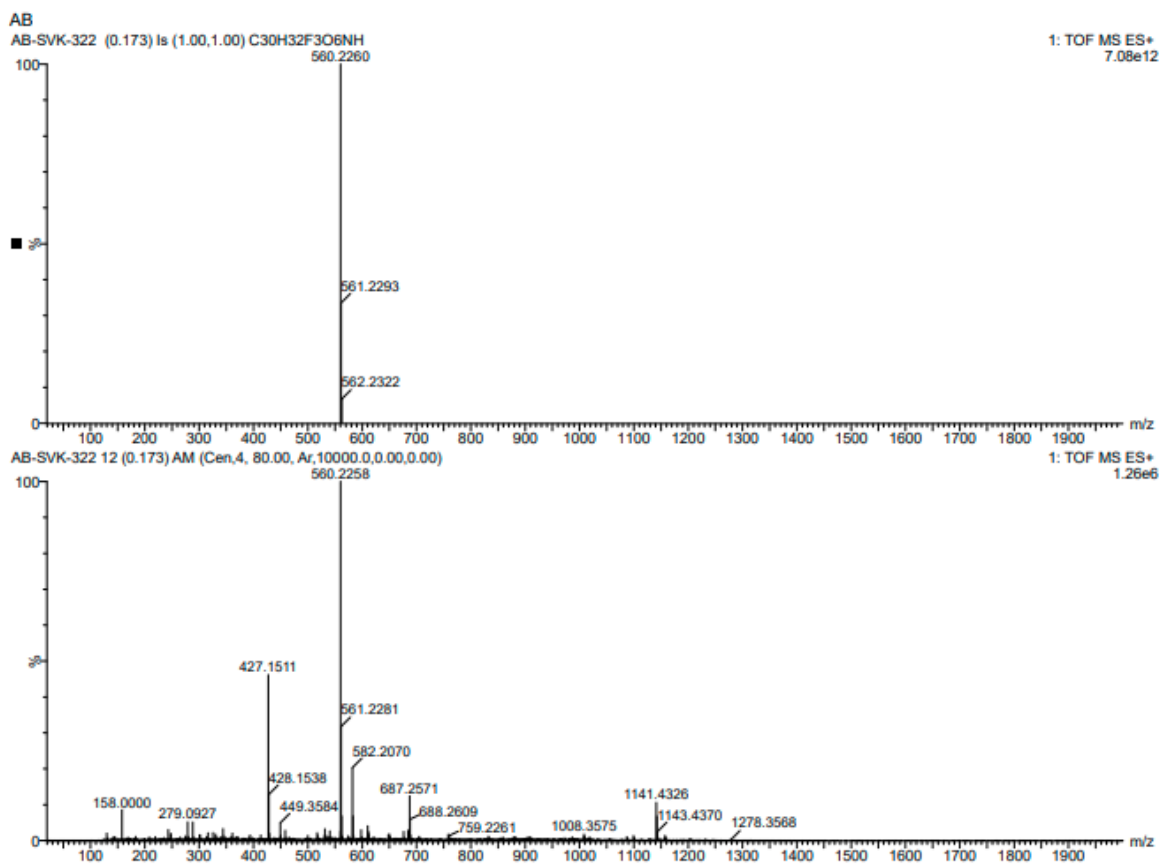HRMS data of (+)-**23c**

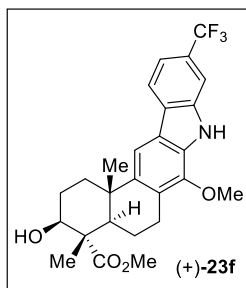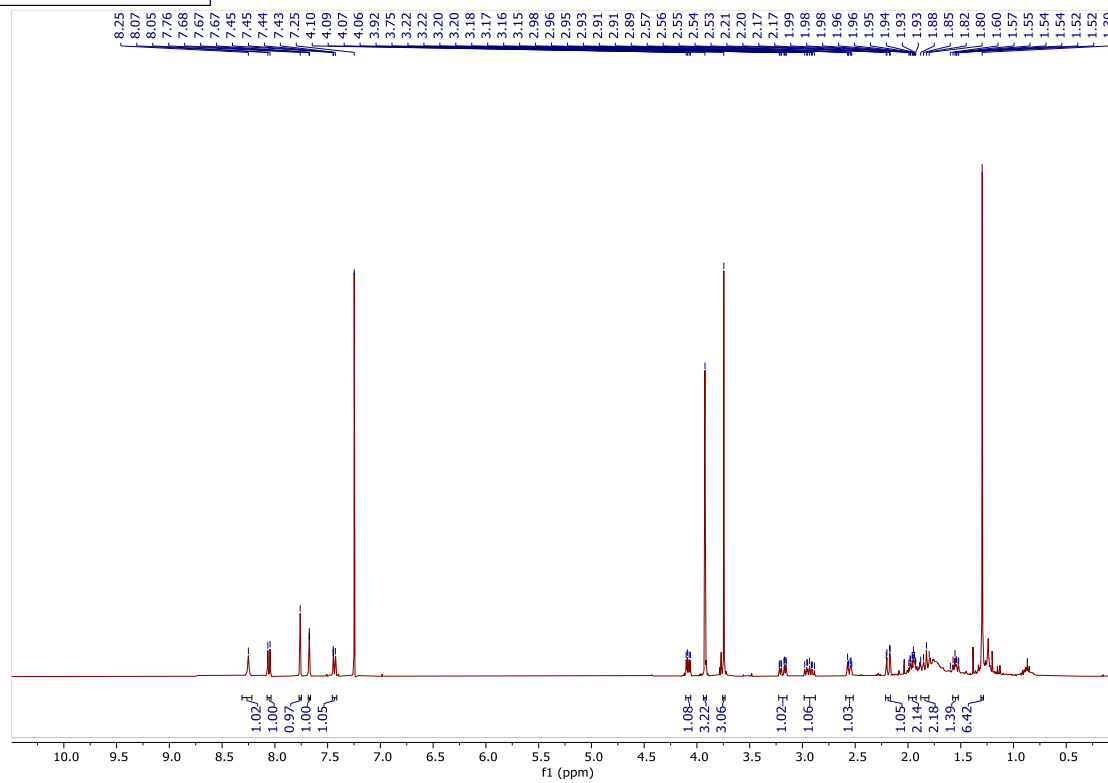

<sup>1</sup>H NMR (400 MHz, CDCl<sub>3</sub>) of (+)-23f

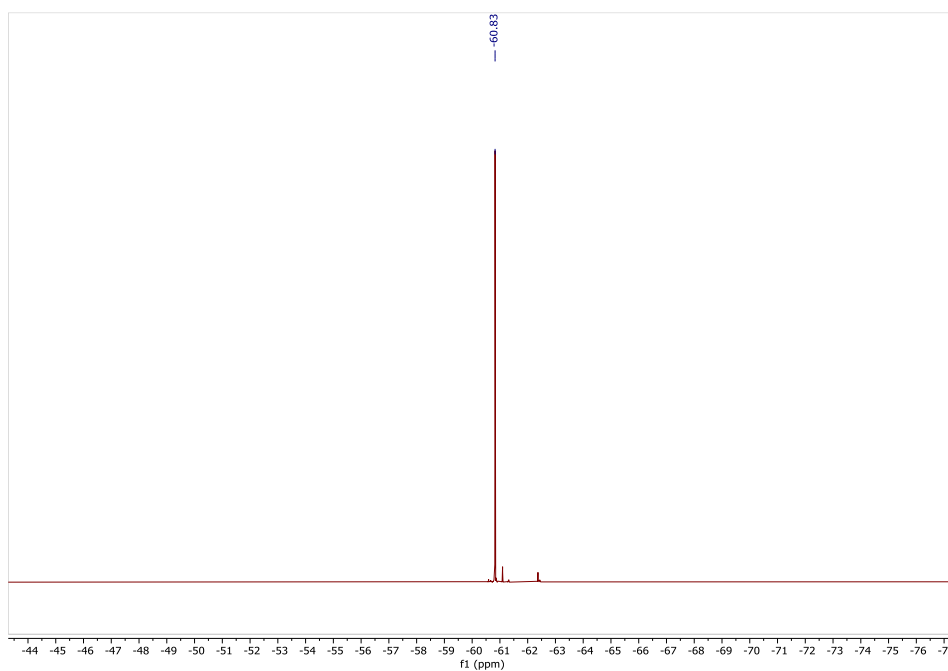

<sup>19</sup>F NMR (376 MHz, CDCl<sub>3</sub>) of (+)-23f

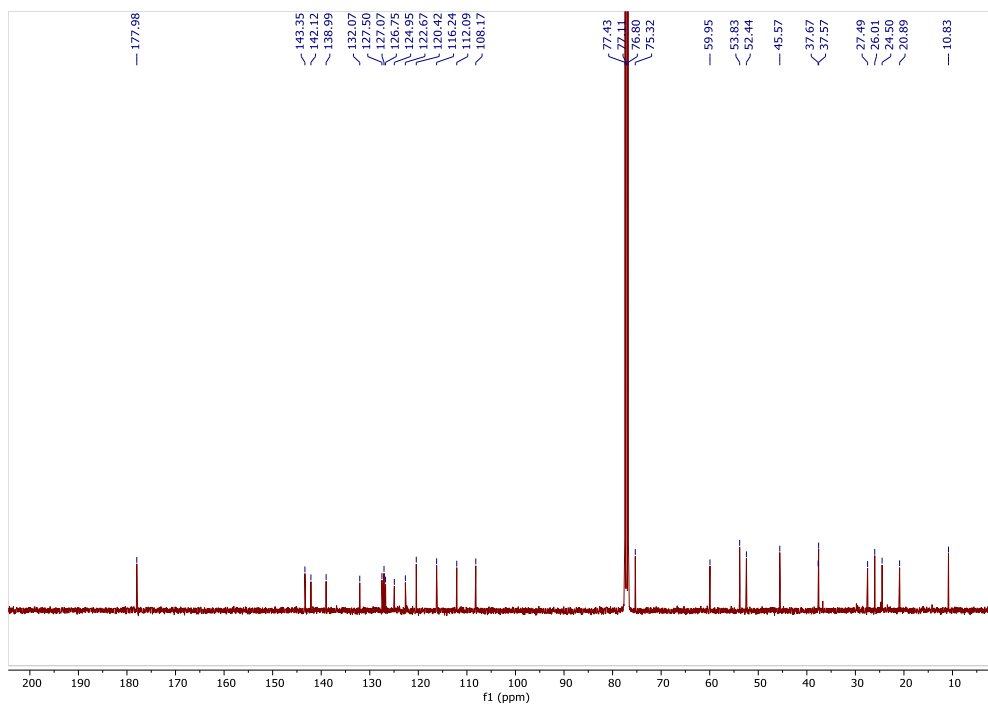
 $^{13}\text{C}\{^{19}\text{F}\} \{^1\text{H}\}$  NMR (101 MHz,  $\text{CDCl}_3$ ) of (+)-**23f**
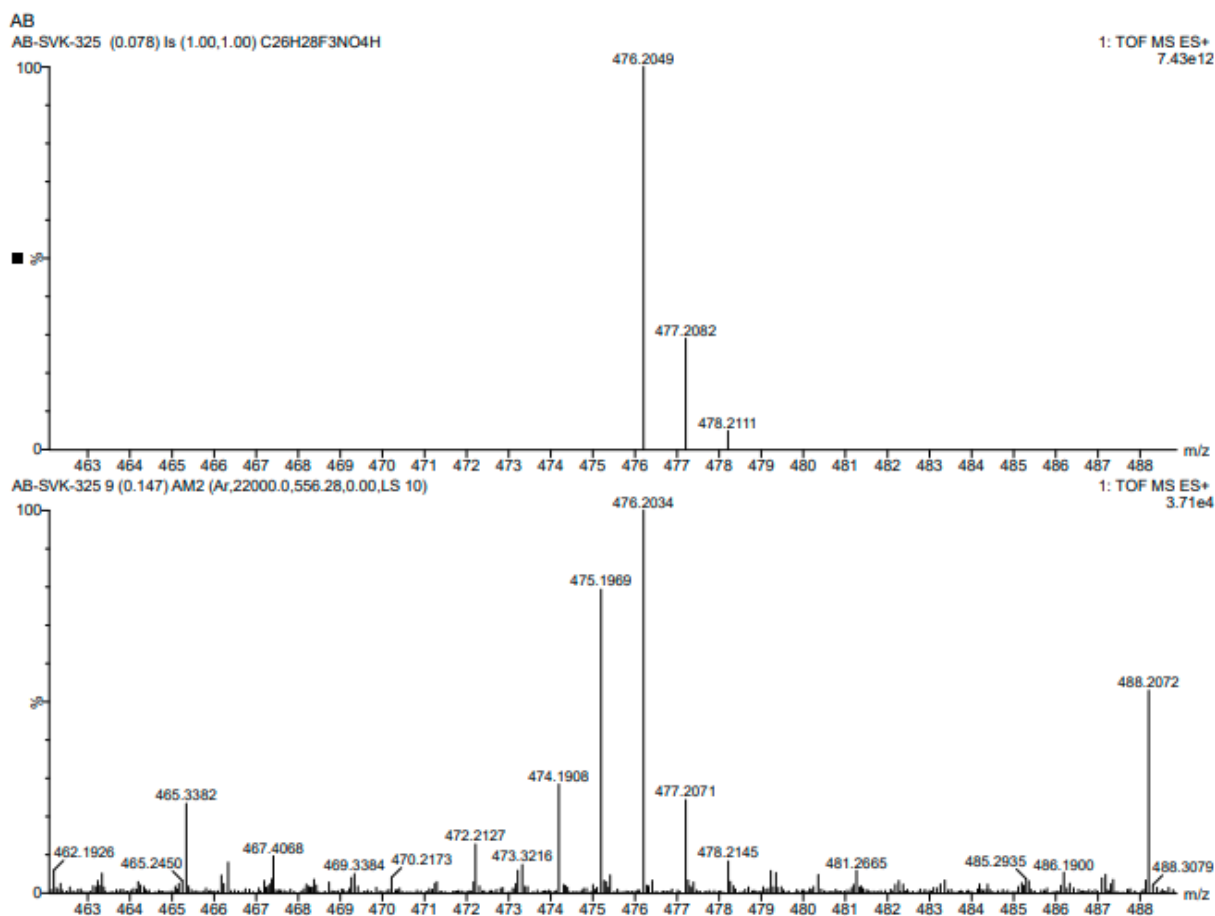HRMS data of (+)-**23f**



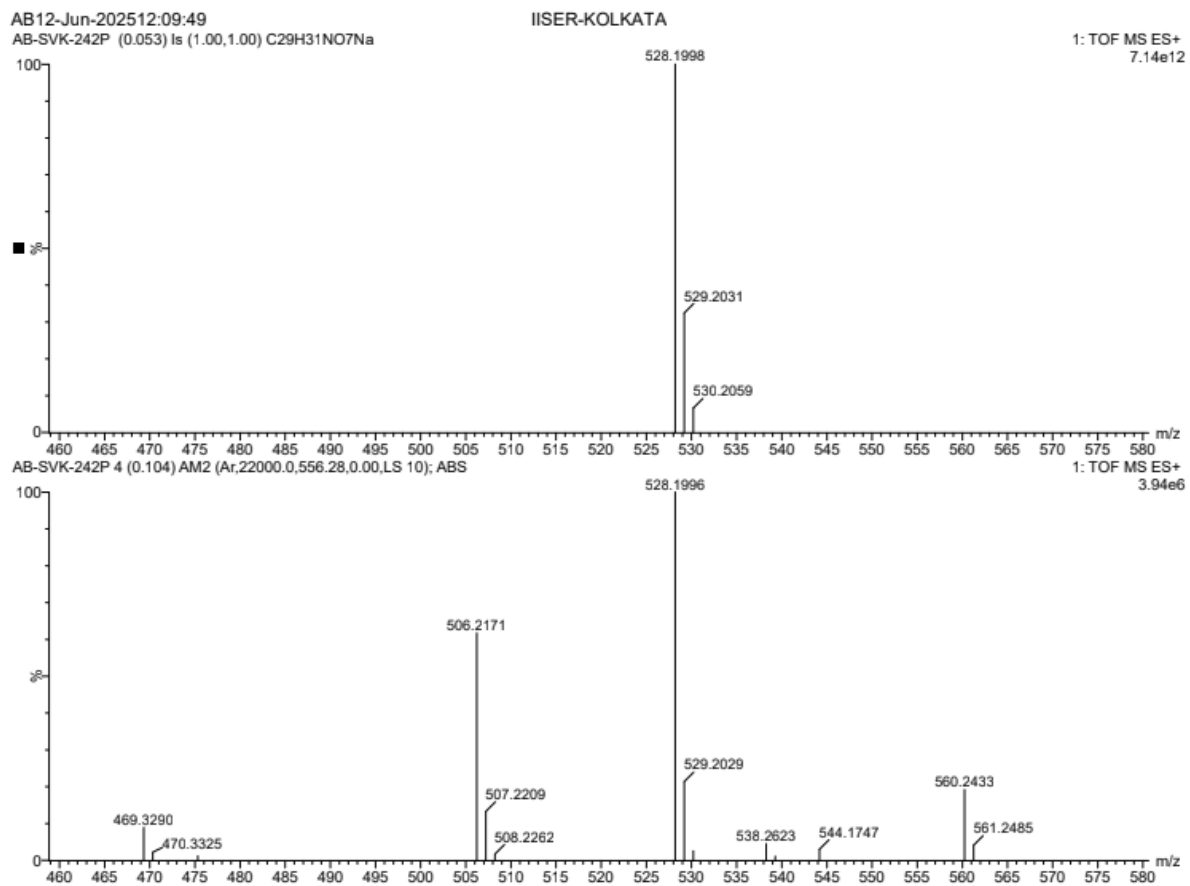

HRMS data of (+)-27

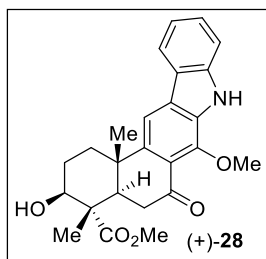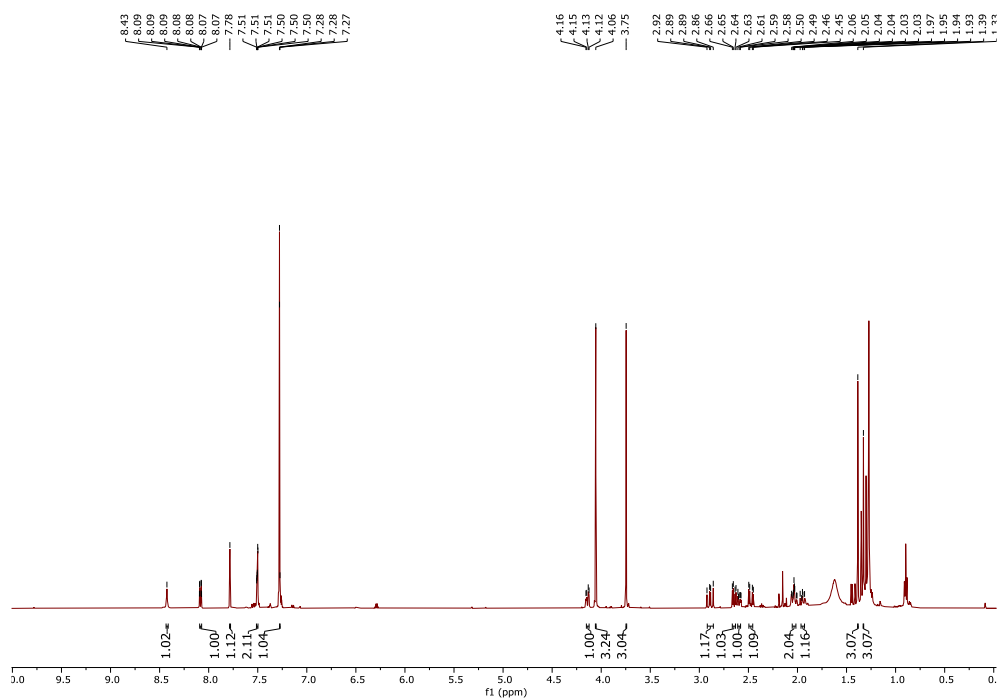

<sup>1</sup>H NMR (500 MHz, CDCl<sub>3</sub>) of (+)-28

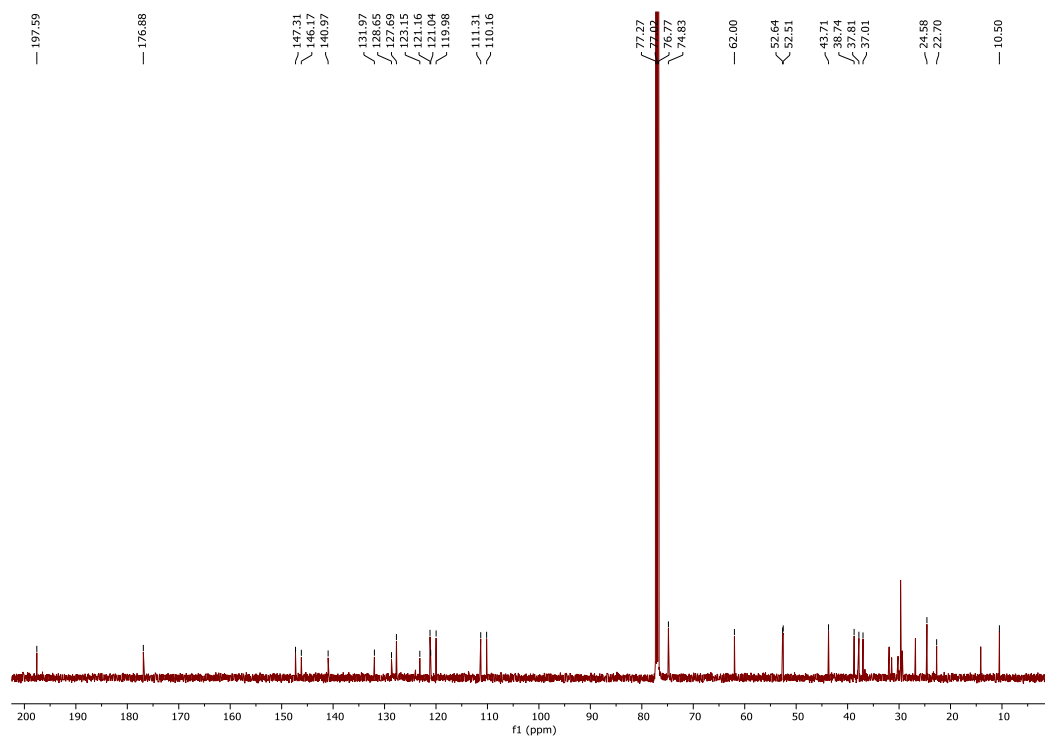

<sup>13</sup>C NMR (126 MHz, CDCl<sub>3</sub>) of (+)-28

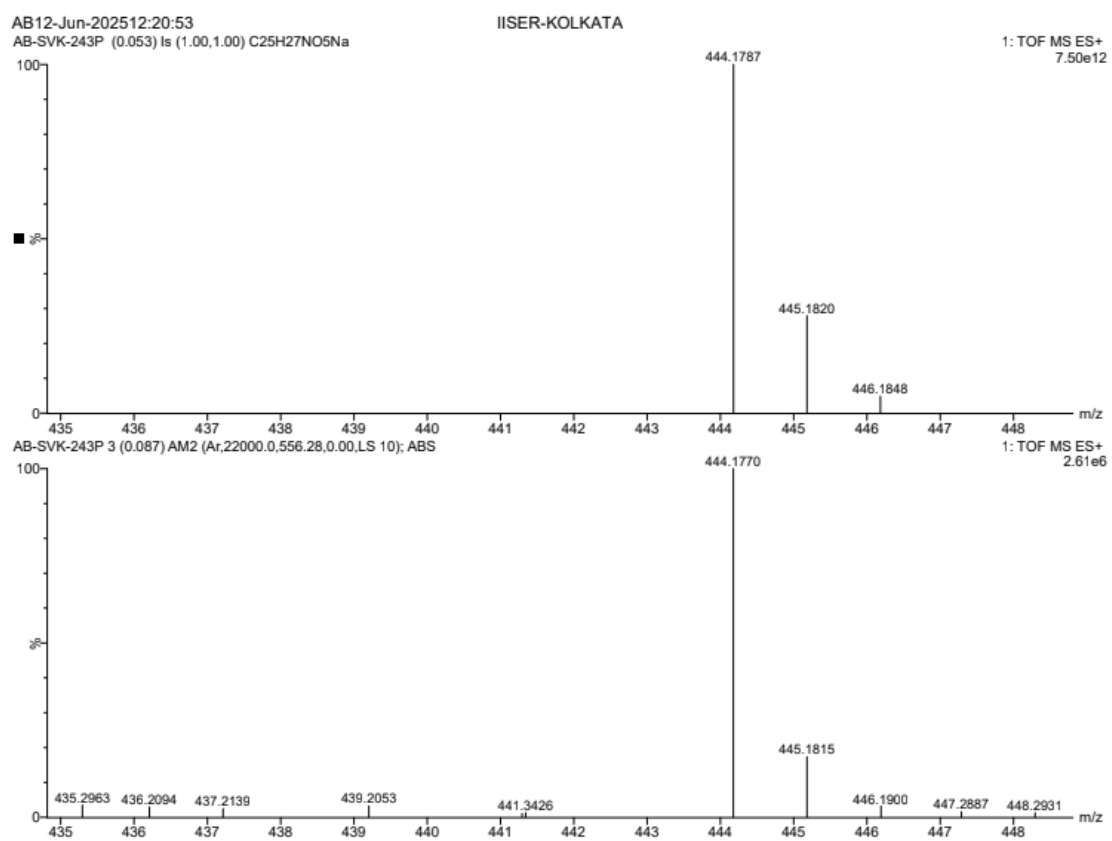

HRMS data of (+)-28

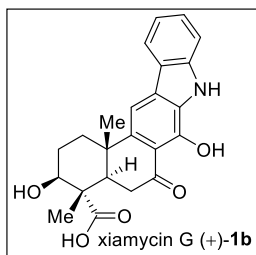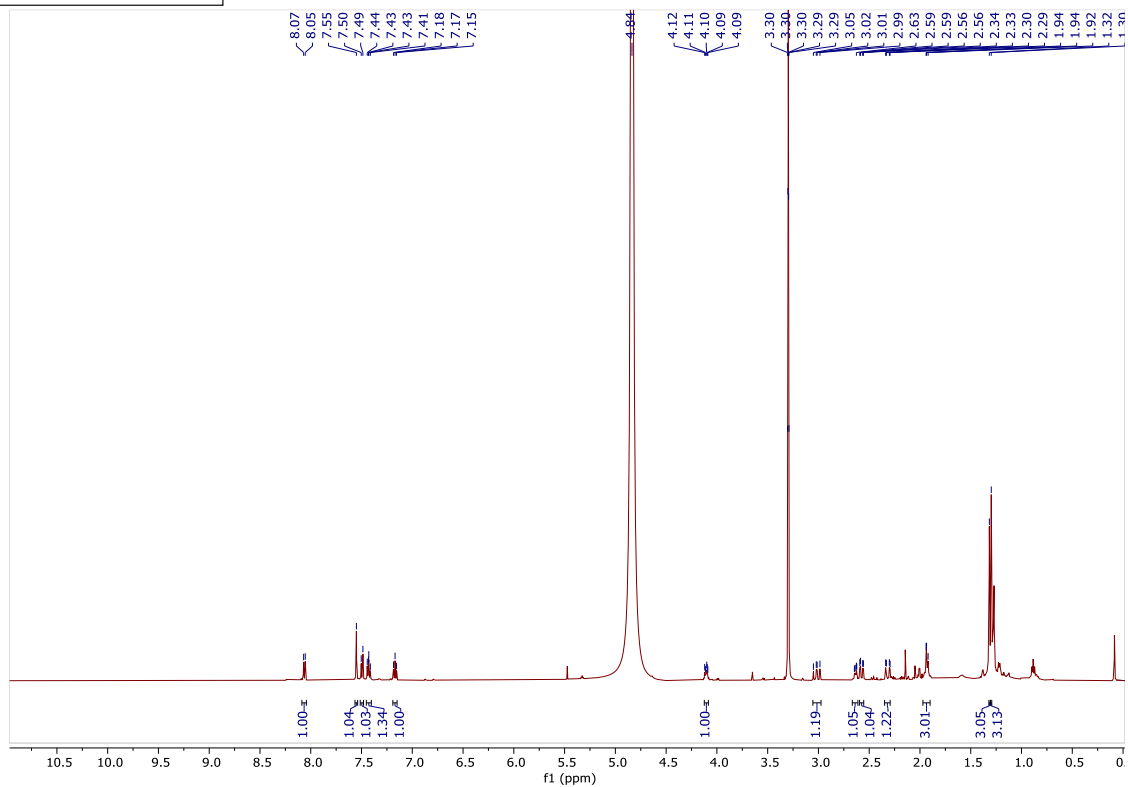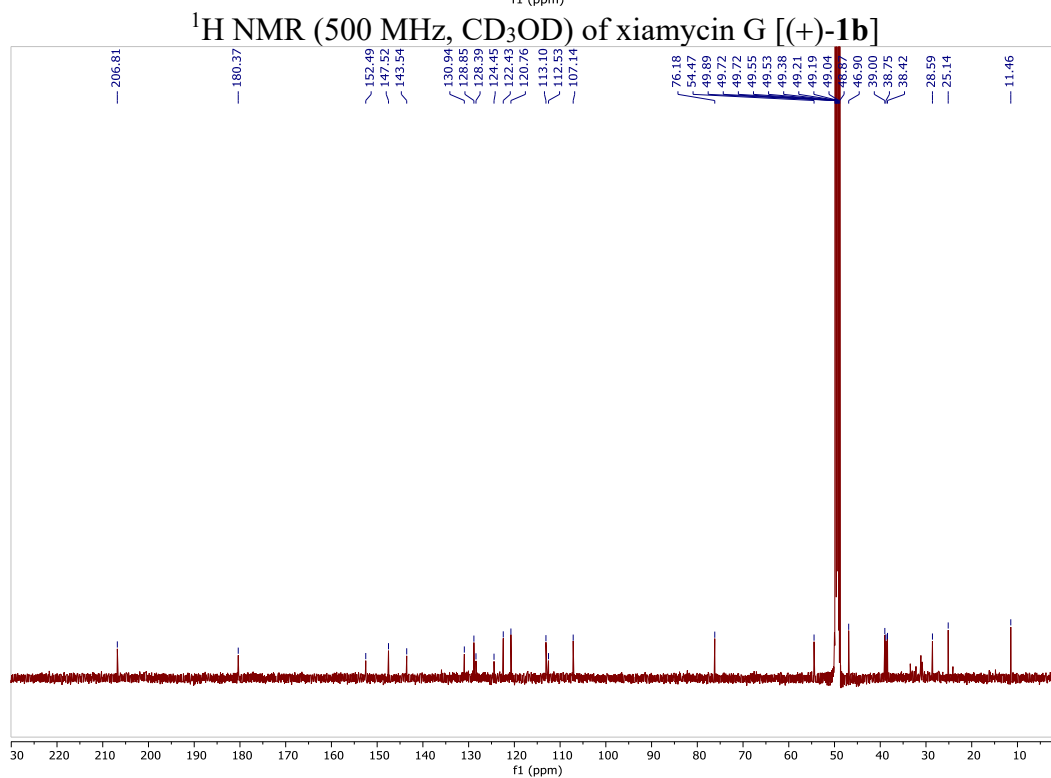

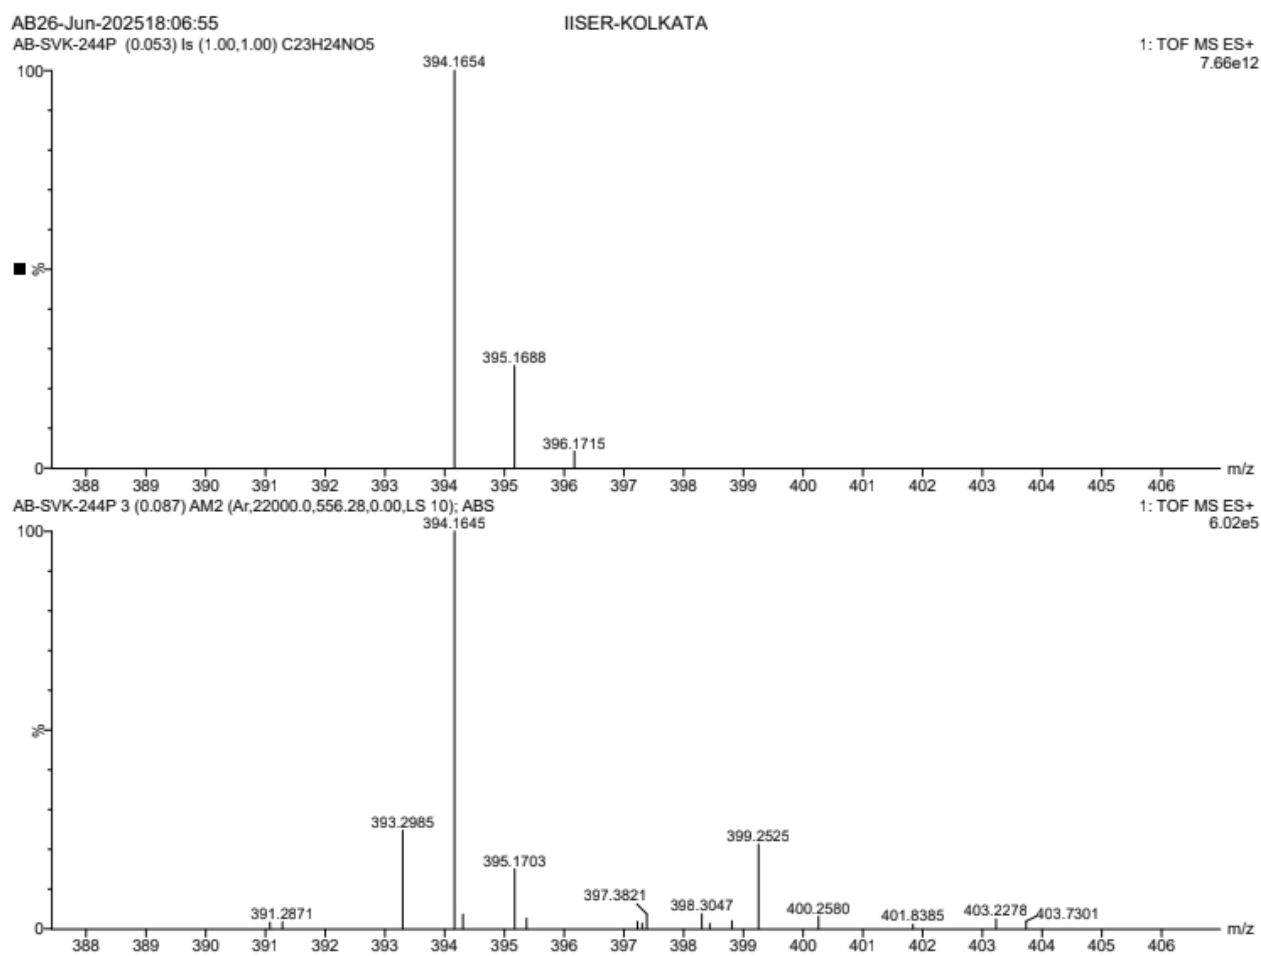HRMS data of xiamycin G [(+)-**1b**]

**Crystal Data and Structure Refinement of (+)-12 (CCDC 2496283):**

A colorless block  $0.04 \times 0.04 \times 0.02$  mm in size was mounted on a Cryoloop with Paratone oil. Data were collected in a nitrogen gas stream at 100.15 K using omega scans. Crystal-to-detector distance was 43.92 mm and exposure time was 0.50 seconds per frame at low angles and 2.00 seconds at high angles, using a scan width of  $0.5^\circ$ . The  $2\theta$  range for data collection  $^\circ$  4.25 to 50.73. A total of 66388 reflections were collected covering the  $-18 \leq h \leq 18$ ,  $-8 \leq k \leq 8$ ,  $-23 \leq l \leq 23$ . 7124 reflections were founded to be symmetry independent, with an  $R_{\text{int}}$  of 0.0561. Indexing and unit cell refinement indicated a primitive, monoclinic lattice. The space group was found to be  $P2_1$ . Empirical absorption correction using spherical harmonics, implemented in SCALE3 ABSPACK scaling algorithm. Solution by intrinsic phasing (SHELXT-2018/2) produced a heavy-atom phasing model consistent with the proposed structure. All non-hydrogen atoms were refined anisotropically by least-squares (SHELXL-2018/3). All hydrogen atoms were placed using a riding model. Their positions were constrained relative to their parent atom using the appropriate HFIX command in SHELXL-2018/3.

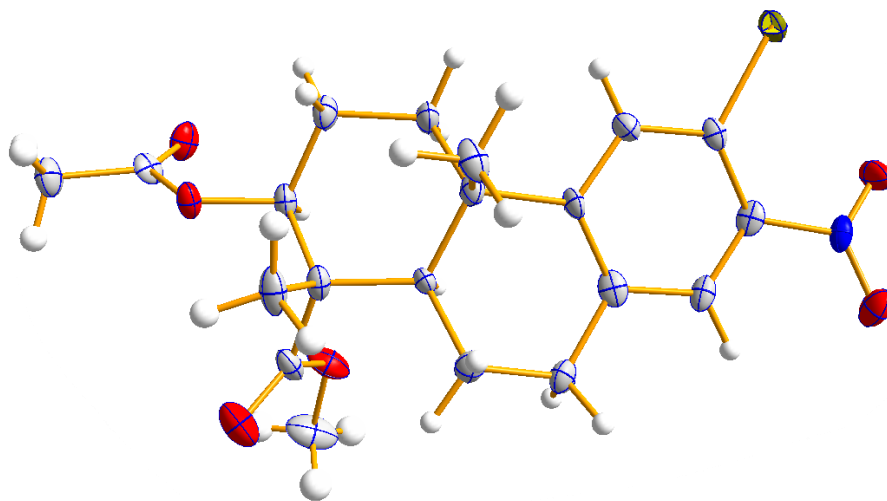

**Figure S1.** Single crystal XRD structure of compound (+)-12.

**Crystal Data and Structure Refinement of (+)-15 (CCDC 2246466):**

A colorless block  $0.45 \times 0.12 \times 0.05$  mm in size was mounted on a Cryoloop with Paratone oil. Data were collected in a nitrogen gas stream at 100.15 K using omega scans. Crystal-to-detector distance was 43.92 mm and exposure time was 0.50 seconds per frame at low angles and 2.00 seconds at high angles, using a scan width of  $0.5^\circ$ . The  $2\theta$  range for data collection  $^\circ$  7.912 to 137.188. A total of 45519 reflections were collected covering the indices  $-10 \leq h \leq 10$ ,  $-18 \leq k \leq 18$ ,  $-19 \leq l \leq 19$ . 4131 reflections were founded to be symmetry independent, with an  $R_{\text{int}}$  of 0.0685. Indexing and unit cell refinement indicated a primitive, orthorhombic lattice. The space group was found to be  $P2_12_12_1$ . CrysAlis<sup>Pro</sup> 1.171.41.115a (Rigaku Oxford Diffraction, 2021) Empirical absorption correction using spherical harmonics, implemented in SCALE3 ABSPACK scaling algorithm. Solution by intrinsic phasing (SHELXT-2018/2) produced a heavy-atom phasing model consistent with the proposed structure. All non-hydrogen atoms were refined anisotropically by least-squares (SHELXL-2018/3). All hydrogen atoms were placed using a riding model. Their positions were constrained relative to their parent atom using the appropriate HFIX command in SHELXL-2018/3.

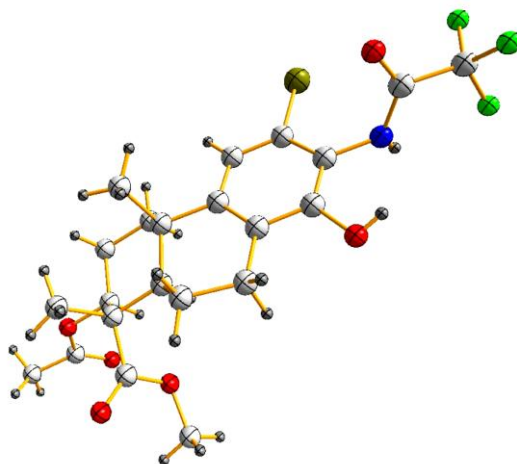

**Figure S2.** Single crystal XRD structure of compound (+)-15.
